# Supplementary material for: In Vitro and In Silico Anti-Picornavirus Triterpene Alkanoic Acid Ester from Saudi Collection of Rhazya stricta Decne
Source: MDPI journal article supplement (doi:10.3390/metabo13060750), 2023-06-13
Supplement: s1 [file s1]

Type of the Paper (Article, Review, Communication, etc.)

# ***In vitro* and *In silico* Anti-Picornavirus Triterpene Alkanoic Acid Ester from Saudi Collection of *Rhazya stricta* Decne.**

Maged S. Abdel-Kader <sup>1,2\*</sup>, Fahad S. Almutib <sup>3</sup>, Abdullah F. Aldosari <sup>3</sup>, Gamal A. Soliman <sup>4,5</sup>, Hisham Y. Elzorba <sup>5</sup>,  
Mohammed H. Alqarni <sup>1</sup>, Reham S. Ibrahim<sup>2</sup> and Hala H. Zaatout <sup>2</sup>

<sup>1</sup> Department of Pharmacognosy, College of Pharmacy, Prince Sattam bin Abdulaziz University, Al kharij11942, Saudi Arabia; m.youssef@psau.edu.sa , m.alqarni@psau.edu.sa

<sup>2</sup> Department of Pharmacognosy, College of Pharmacy, Alexandria University, Alexandria 21521, Egypt, hala.zaatout@alexu.edu.eg , reham.abdelkader@alexu.edu.eg

<sup>3</sup> College of Pharmacy, Prince Sattam bin Abdulaziz University, Al kharij11942, Saudi Arabia; Fahadsmoteb@gmail.com , ph.abdullah77@gmail.com

<sup>4</sup> Department of Pharmacology, College of Pharmacy, Prince Sattam bin Abdulaziz University, Al kharij11942, Saudi Arabia; g.soliman@psau.edu.sa

<sup>5</sup> Department of Pharmacology, College of Veterinary Medicine, Cairo University, Giza, Egypt

\* Correspondence: m.youssef@psau.edu.sa ; Tel.: +966-545-539-145

## Table of Contents

|                                                                           | Page |
|---------------------------------------------------------------------------|------|
| <b>Figure S1.</b> <sup>1</sup> H NMR spectrum of <b>1</b> .....           | 4    |
| <b>Figure S2.</b> <sup>1</sup> H NMR spectrum of <b>1</b> (Exp.).....     | 4    |
| <b>Figure S3.</b> <sup>13</sup> C NMR spectrum of <b>1</b> (Exp.).....    | 5    |
| <b>Figure S4.</b> <sup>13</sup> C NMR spectrum of <b>1</b> (Exp.).....    | 5    |
| <b>Figure S5.</b> DEPT135 spectrum of <b>1</b> (Exp.).....                | 6    |
| <b>Figure S6.</b> DEPT135 spectrum of <b>1</b> (Exp.) .....               | 6    |
| <b>Figure S7.</b> HRESIMS spectrum of <b>1</b> .....                      | 7    |
| <b>Figure S8.</b> <sup>1</sup> H NMR spectrum of <b>1a</b> .....          | 8    |
| <b>Figure S9.</b> <sup>1</sup> H NMR spectrum of <b>1a</b> (Exp.).....    | 8    |
| <b>Figure S10.</b> <sup>1</sup> H NMR spectrum of <b>1a</b> (Exp.).....   | 9    |
| <b>Figure S11.</b> <sup>13</sup> C NMR spectrum of <b>1a</b> (Exp.).....  | 9    |
| <b>Figure S12.</b> <sup>13</sup> C NMR spectrum of <b>1a</b> (Exp.).....  | 10   |
| <b>Figure S13.</b> DEPT135 spectrum of <b>1a</b> .....                    | 10   |
| <b>Figure S14.</b> COSY spectrum of <b>1a</b> .....                       | 11   |
| <b>Figure S15.</b> HSQC spectrum of <b>1a</b> .....                       | 11   |
| <b>Figure S16.</b> HSQC spectrum of <b>1a</b> (Exp.).....                 | 12   |
| <b>Figure S17.</b> HSQC spectrum of <b>1a</b> (Exp.).....                 | 12   |
| <b>Figure S18.</b> HMBC spectrum of <b>1a</b> (Exp.).....                 | 13   |
| <b>Figure S19.</b> HMBC spectrum of <b>1a</b> (Exp.).....                 | 13   |
| <b>Figure S20.</b> HMBC spectrum of <b>1a</b> (Exp.).....                 | 14   |
| <b>Figure S21.</b> HRESIMS spectrum of <b>1a</b> .....                    | 14   |
| <b>Figure S22.</b> <sup>1</sup> H NMR spectrum of <b>1b</b> (Exp.).....   | 15   |
| <b>Figure S23.</b> <sup>1</sup> H NMR spectrum of <b>1b</b> (Exp.).....   | 15   |
| <b>Figure S24.</b> <sup>1</sup> H NMR spectrum of <b>1b</b> (Exp.).....   | 16   |
| <b>Figure S25.</b> <sup>13</sup> C NMR spectrum of <b>1b</b> .....        | 16   |
| <b>Figure S26.</b> <sup>13</sup> C NMR spectrum of <b>1b</b> (Exp.) ..... | 17   |
| <b>Figure S27.</b> DEPT135 spectrum of <b>1b</b> .....                    | 17   |
| <b>Figure S28.</b> HSQC spectrum of <b>1b</b> .....                       | 18   |

|                       |             |                    |                                         |                      |           |           |
|-----------------------|-------------|--------------------|-----------------------------------------|----------------------|-----------|-----------|
| <b>Figure</b>         | <b>S29.</b> | HSQC               | spectrum                                | of                   | <b>1b</b> | <b>18</b> |
| (Exp.) .....          |             |                    |                                         |                      |           |           |
| <b>Figure</b>         | <b>S30.</b> | HSQC               | spectrum                                | of                   | <b>1b</b> | <b>19</b> |
| (Exp.) .....          |             |                    |                                         |                      |           |           |
| <b>Figure</b>         | <b>S31.</b> | H2BC               | spectrum                                | of                   | <b>1b</b> | <b>19</b> |
| .....                 |             |                    |                                         |                      |           |           |
| <b>Figure S32.</b>    |             |                    | H2BC spectrum of <b>1b</b>              | (Exp.) .....         |           | <b>20</b> |
| <b>Figure S33.</b>    |             |                    | HMBC spectrum of <b>1b</b>              | .....                |           | <b>20</b> |
| <b>Figure S34.</b>    |             |                    | HRESIMS spectrum of <b>1b</b>           | (Negative mode)..... |           | <b>21</b> |
| <b>Figure S35.</b>    |             |                    | HRESIMS spectrum of <b>1b Ac</b>        | (Negative mode)..... |           | <b>21</b> |
| <b>Figure S36.</b>    |             |                    | <sup>1</sup> HNMR spectrum of <b>2</b>  | (Exp.).....          |           | <b>22</b> |
| <b>Figure S37.</b>    |             |                    | <sup>1</sup> HNMR spectrum of <b>2</b>  | (Exp.).....          |           | <b>22</b> |
| <b>Figure S38.</b>    |             |                    | <sup>13</sup> CNMR spectrum of <b>2</b> | (Exp.).....          |           | <b>23</b> |
| <b>Figure S39.</b>    |             |                    | <sup>13</sup> CNMR spectrum of <b>2</b> | (Exp.).....          |           | <b>23</b> |
| <b>Figure</b>         | <b>S40.</b> | DEPT135            | spectrum                                | of                   | <b>2</b>  | <b>24</b> |
| (Exp.) .....          |             |                    |                                         |                      |           |           |
| <b>Figure</b>         | <b>S41.</b> | DEPT135            | spectrum                                | of                   | <b>2</b>  | <b>24</b> |
| (Exp.) .....          |             |                    |                                         |                      |           |           |
| <b>Figure</b>         | <b>S42.</b> | HSQC               | spectrum                                | of                   | <b>2</b>  | <b>25</b> |
| (Exp.) .....          |             |                    |                                         |                      |           |           |
| <b>Figure S43.</b>    |             |                    | H2BC spectrum of <b>2</b>               | (Exp.) .....         |           | <b>25</b> |
| <b>Figure S44.</b>    |             |                    | HMBC spectrum of <b>2</b>               | .....                |           | <b>26</b> |
| <b>Figure</b>         | <b>S45.</b> | HRESIMS            | spectrum                                | of                   | <b>2</b>  | <b>26</b> |
| (Positive mode) ..... |             |                    |                                         |                      |           |           |
| <b>Figure S46.</b>    |             |                    | <sup>1</sup> HNMR spectrum of <b>2a</b> | .....                |           | <b>27</b> |
| <b>Figure S47.</b>    |             |                    | <sup>1</sup> HNMR spectrum of <b>2a</b> | .....                |           | <b>27</b> |
| <b>Figure</b>         | <b>S48.</b> | <sup>13</sup> CNMR | spectrum                                | of                   | <b>2a</b> | <b>28</b> |
| (Exp.).....           |             |                    |                                         |                      |           |           |
| <b>Figure</b>         | <b>S49.</b> | <sup>13</sup> CNMR | spectrum                                | of                   | <b>2a</b> | <b>28</b> |
| (Exp.).....           |             |                    |                                         |                      |           |           |
| <b>Figure</b>         | <b>S50.</b> | DEPT135            | spectrum                                | of                   | <b>2a</b> | <b>29</b> |
| (Exp.).....           |             |                    |                                         |                      |           |           |
| <b>Figure</b>         | <b>S51.</b> | DEPT135            | spectrum                                | of                   | <b>2a</b> | <b>29</b> |
| (Exp.).....           |             |                    |                                         |                      |           |           |
| <b>Figure</b>         | <b>S52.</b> | COSY               | spectrum                                | of                   | <b>2a</b> | <b>30</b> |
| .....                 |             |                    |                                         |                      |           |           |
| <b>Figure</b>         | <b>S53.</b> | HSQC               | spectrum                                | of                   | <b>2a</b> | <b>30</b> |
| (Exp.).....           |             |                    |                                         |                      |           |           |
| <b>Figure</b>         | <b>S54.</b> | HSQC               | spectrum                                | of                   | <b>2a</b> | <b>31</b> |
| (Exp.).....           |             |                    |                                         |                      |           |           |
| <b>Figure</b>         | <b>S55.</b> | H2BC               | spectrum                                | of                   | <b>2a</b> | <b>31</b> |
| (Exp.).....           |             |                    |                                         |                      |           |           |

|                    |                                                                                                                     |          |    |           |           |
|--------------------|---------------------------------------------------------------------------------------------------------------------|----------|----|-----------|-----------|
| <b>Figure S56.</b> | H2BC                                                                                                                | spectrum | of | <b>2a</b> | <b>32</b> |
| (Exp.).....        |                                                                                                                     |          |    |           |           |
| <b>Figure S57.</b> | HMBC                                                                                                                | spectrum | of | <b>2a</b> | <b>32</b> |
| (Exp.).....        |                                                                                                                     |          |    |           |           |
| <b>Figure S58.</b> | HMBC                                                                                                                | spectrum | of | <b>2a</b> | <b>33</b> |
| (Exp.).....        |                                                                                                                     |          |    |           |           |
| <b>Figure S59.</b> | HRESIMS spectrum of <b>2a</b> (Positive mode) .....                                                                 |          |    |           | <b>33</b> |
| <b>Figure S60.</b> | 3D and 2D interaction diagrams of FMDV 3C <sup>pro</sup> with glycyrrhizic acid in 2D representation (lower panel). |          |    |           | <b>34</b> |
| <b>Figure S61.</b> | 3D and 2D interaction diagrams of FMDV 3C <sup>pro</sup> with ribavirin in 2D representation (lower panel).         |          |    |           | <b>35</b> |
| <b>Table S1.</b>   | Determination of total extract and fractions of <i>R. stricta</i> cytotoxicity on BHK cell.                         |          |    |           | <b>36</b> |
| <b>Table S2.</b>   | Determination of compounds <b>1-9</b> cytotoxicity on BHK cell.                                                     |          |    |           | <b>38</b> |



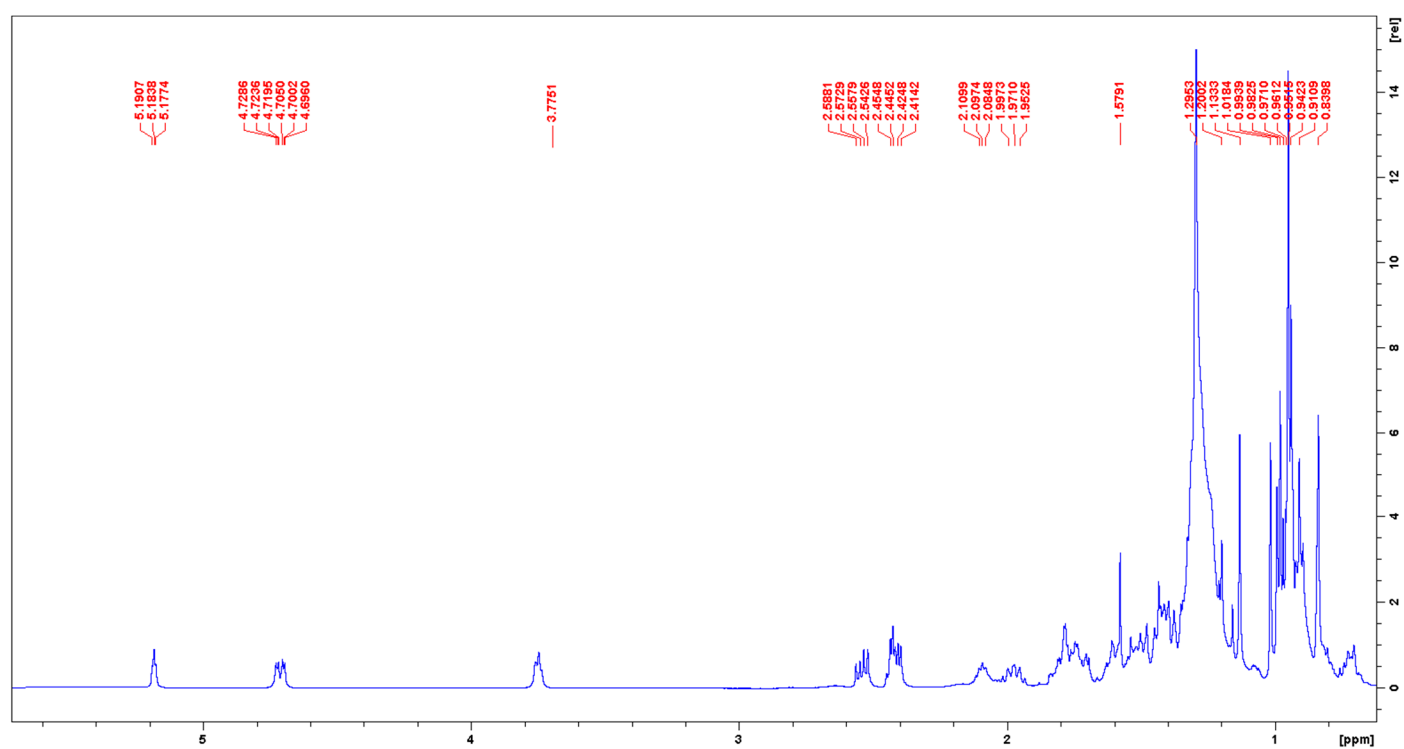Figure S1. <sup>1</sup>H NMR spectrum of 1.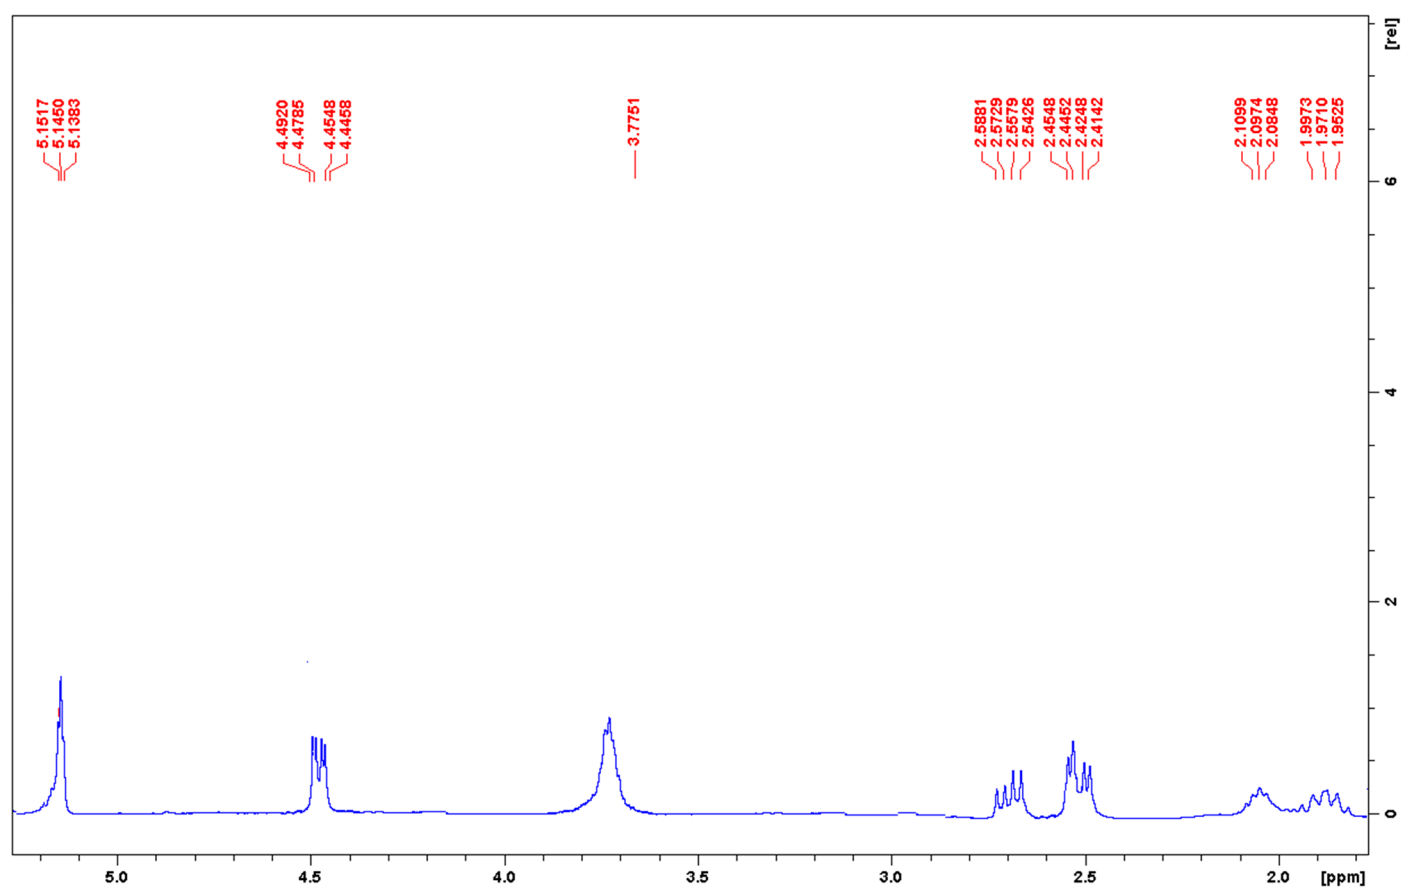Figure S2. <sup>1</sup>H NMR spectrum of 1(Exp.).

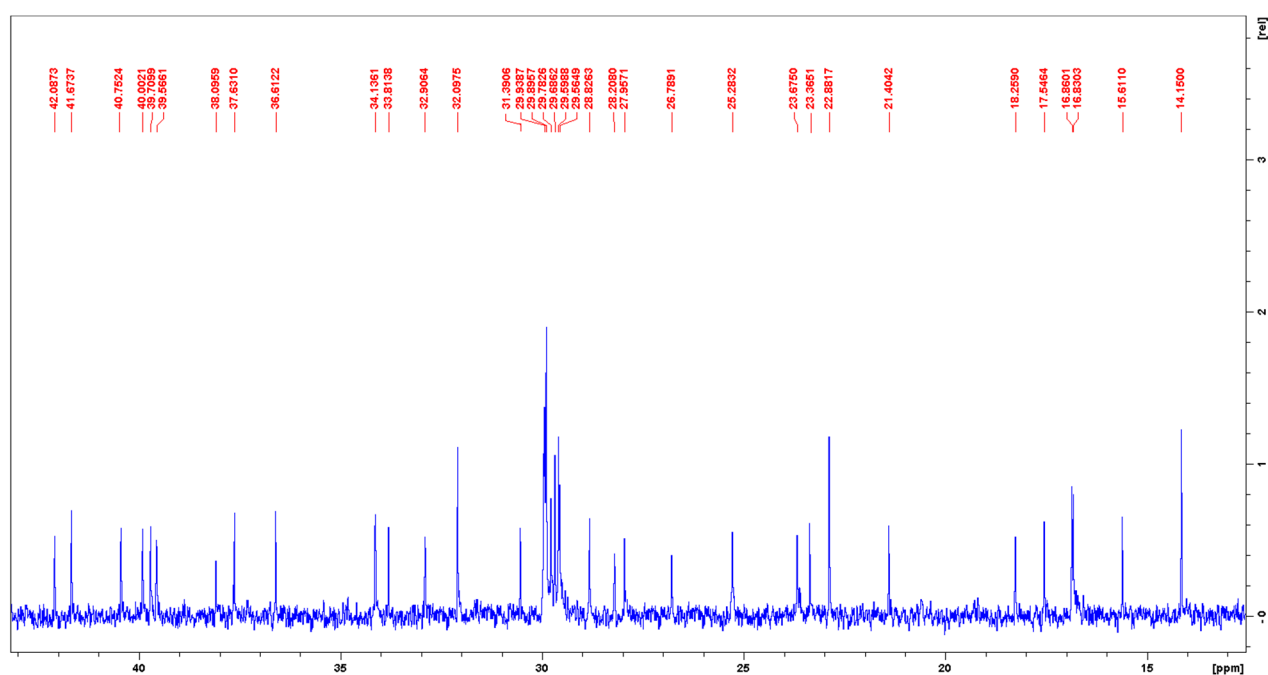Figure S3. <sup>13</sup>CNMR spectrum of 1 (Exp.).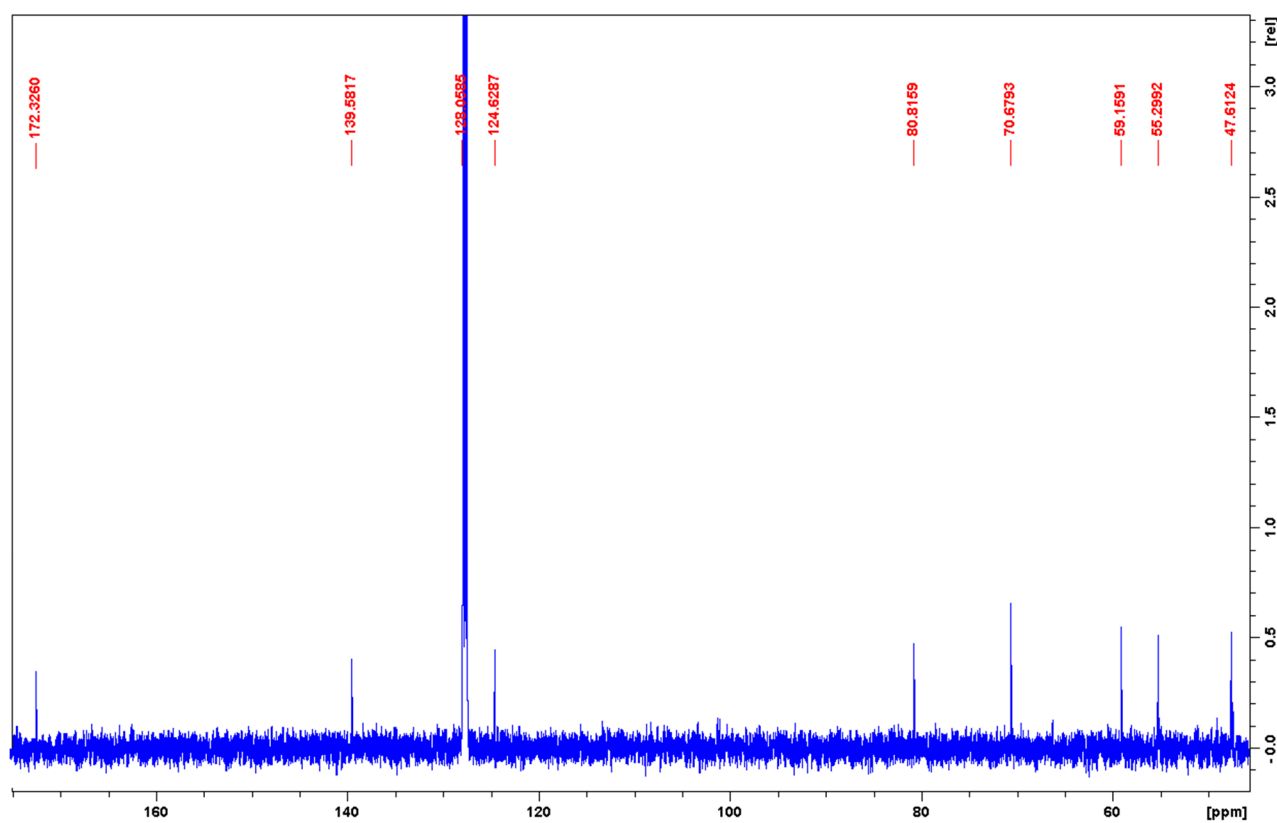Figure S4. <sup>13</sup>CNMR spectrum of 1 (Exp.).

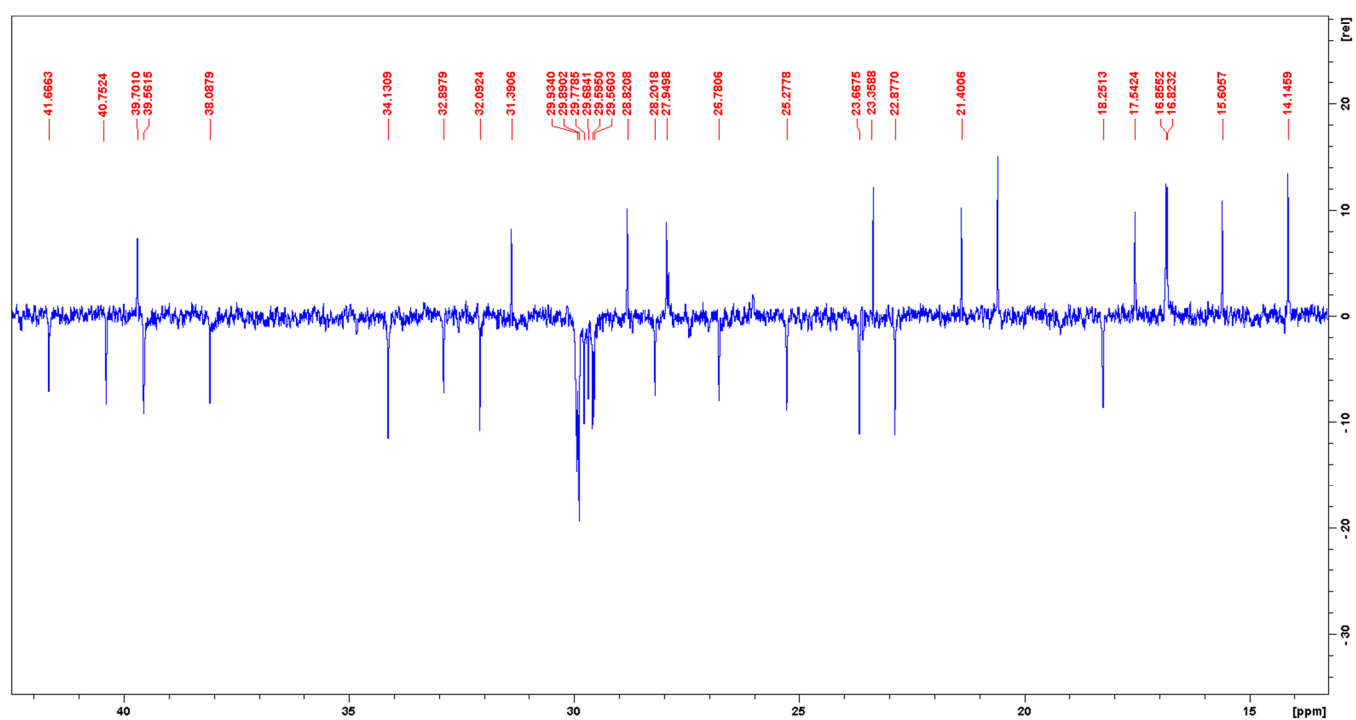

Figure S5. DEPT135 spectrum of 1 (Exp.).

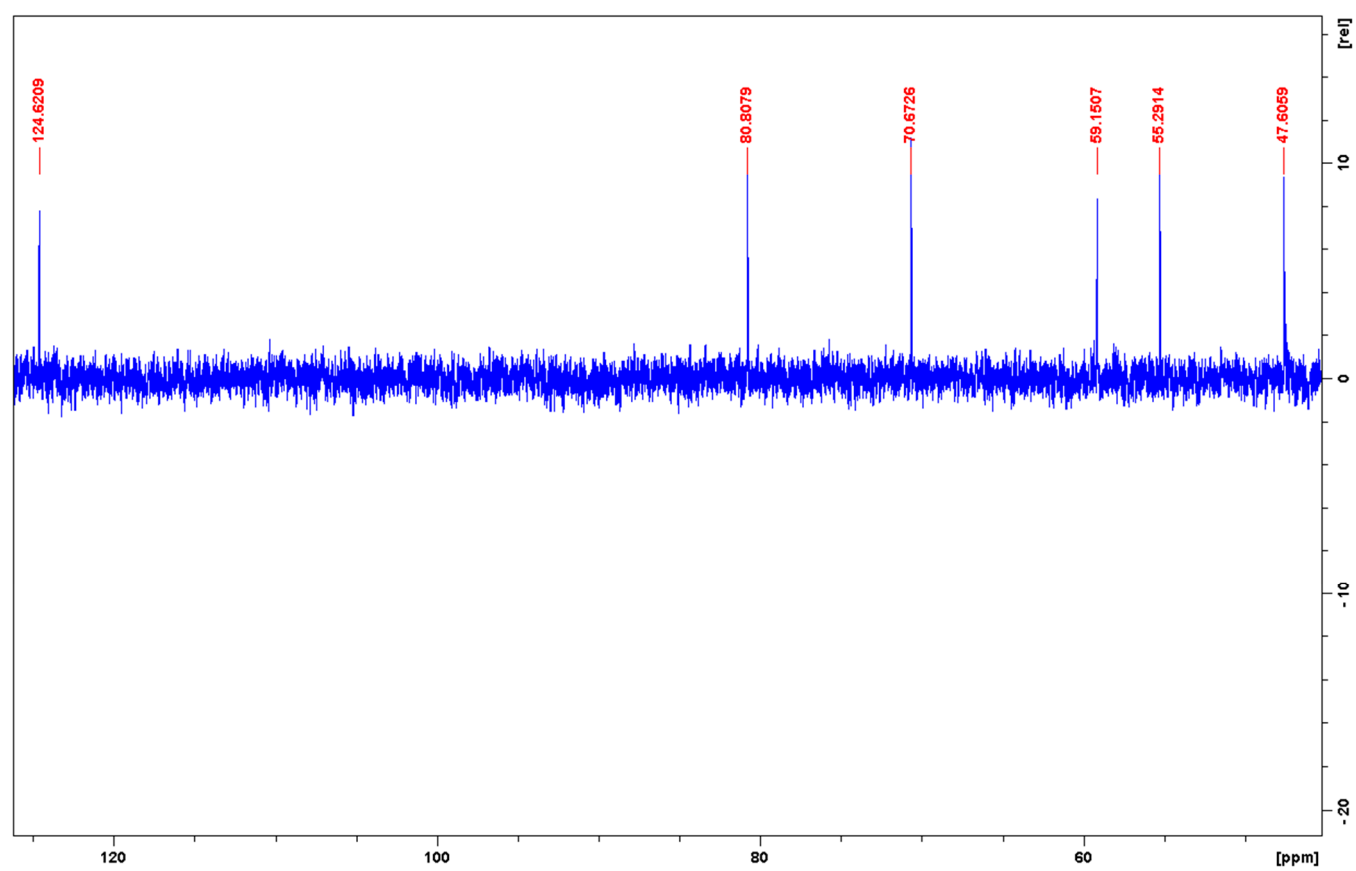

Figure S6. DEPT135 spectrum of 1 (Exp.).

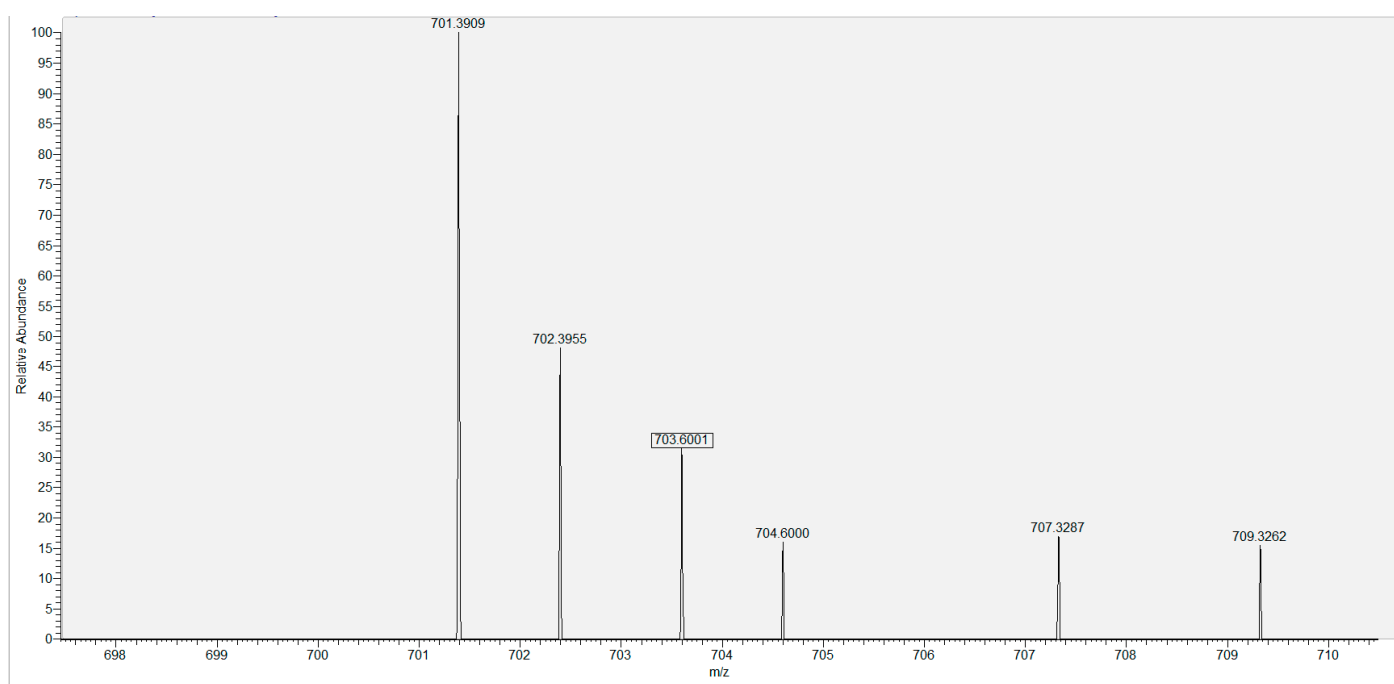

**Figure S7.** HRESIMS spectrum of **1** (Positive mode).

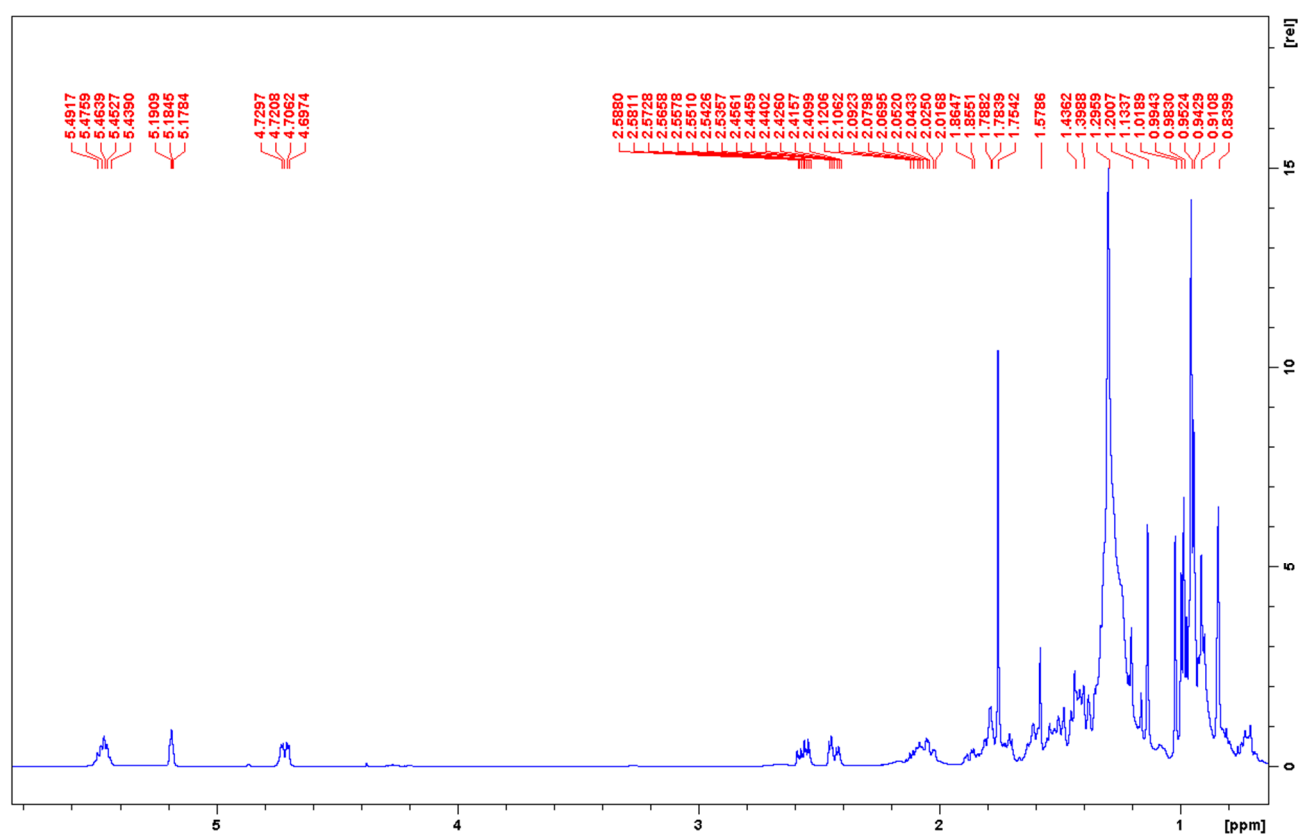Figure S8.  $^1\text{H}$ NMR spectrum of **1a**.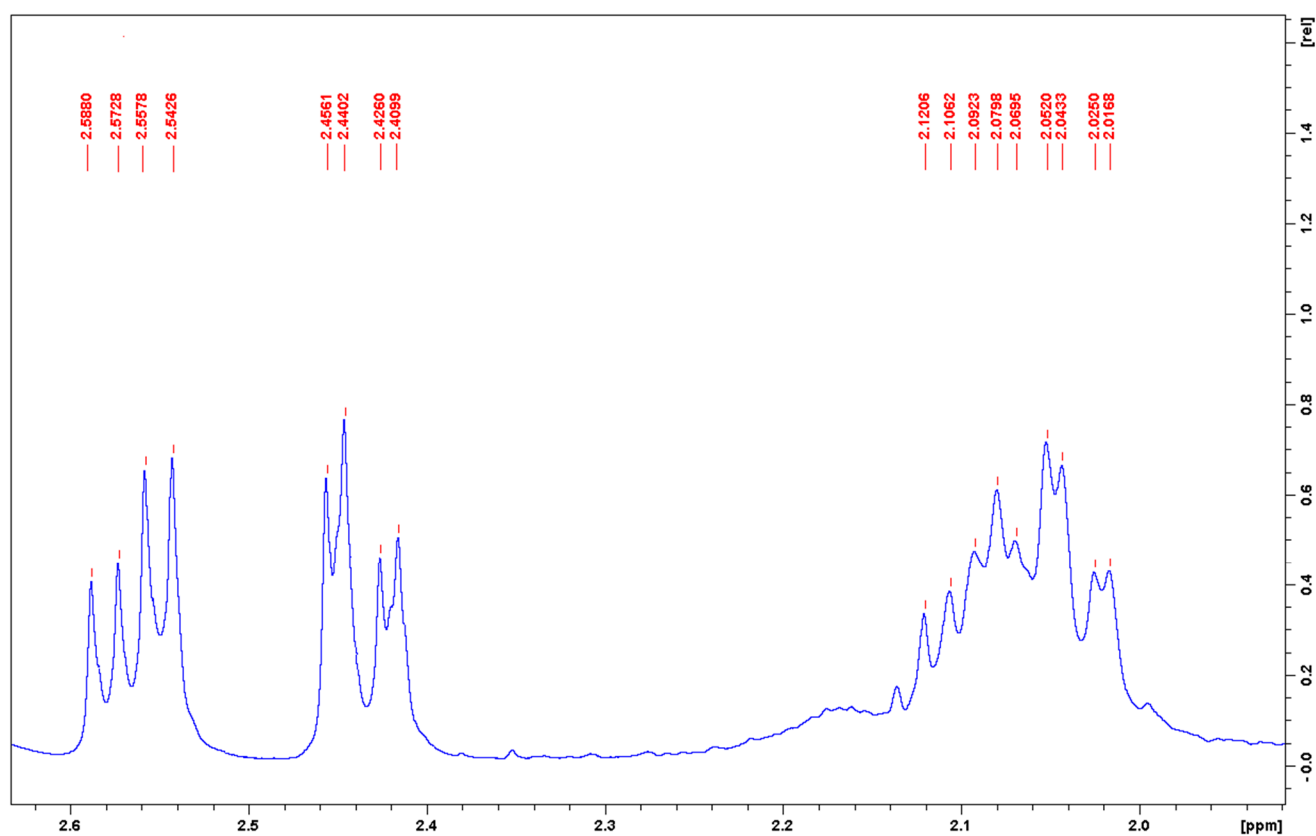Figure S9.  $^1\text{H}$ NMR spectrum of **1a** (Exp.).

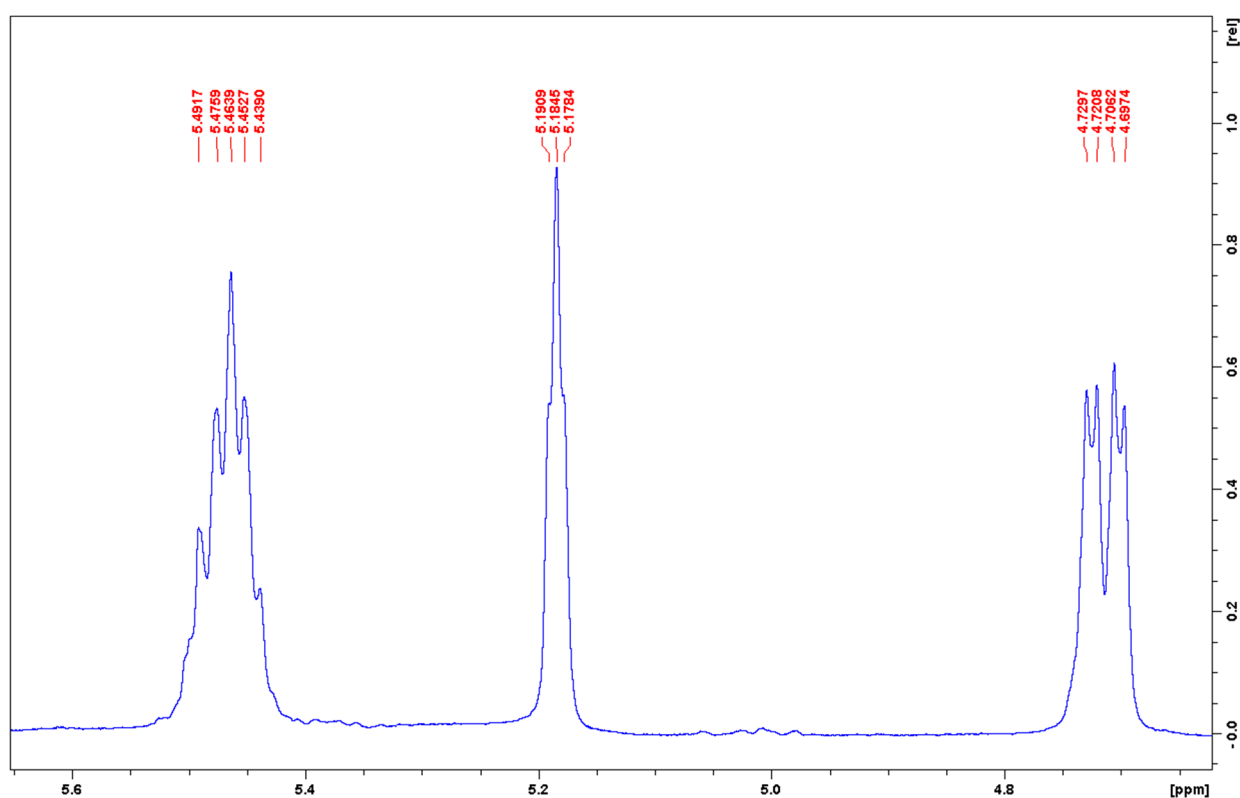Figure S10. <sup>1</sup>H NMR spectrum of 1a (Exp.).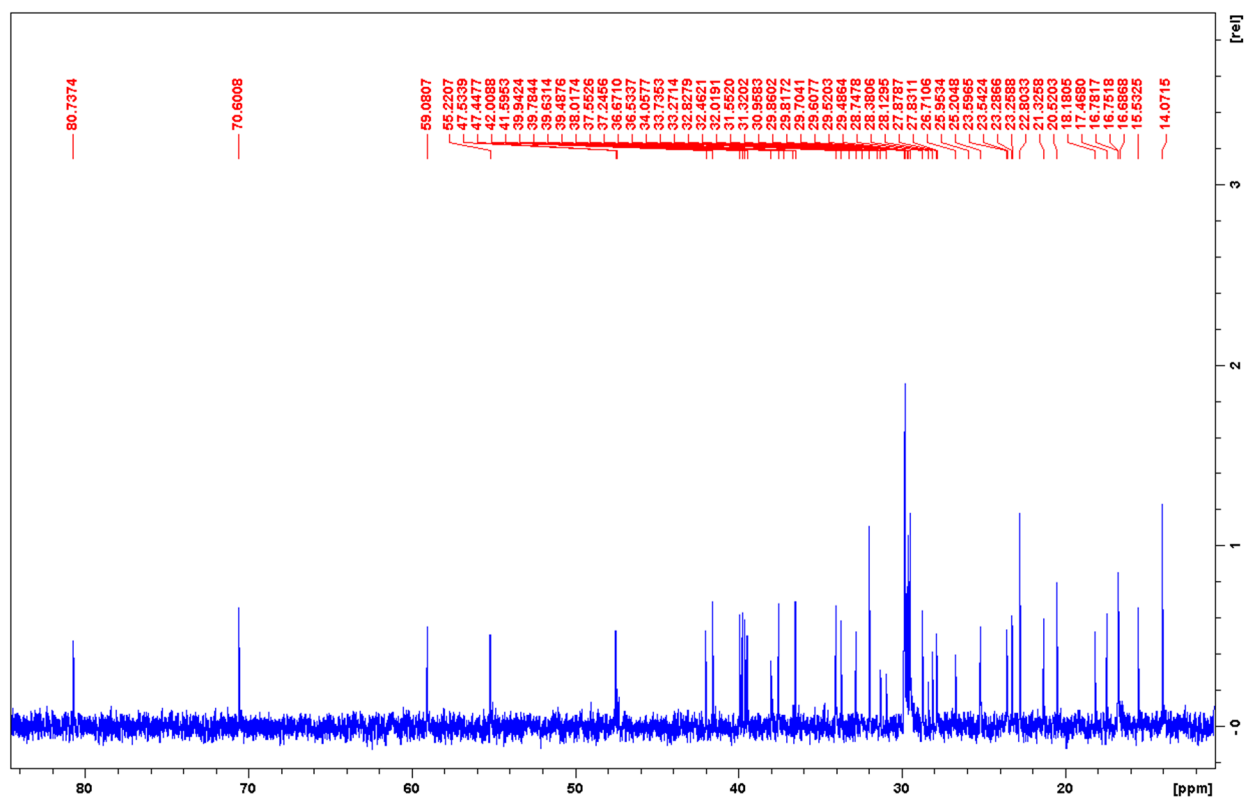Figure S11. <sup>13</sup>C NMR spectrum of 1a (Exp.).

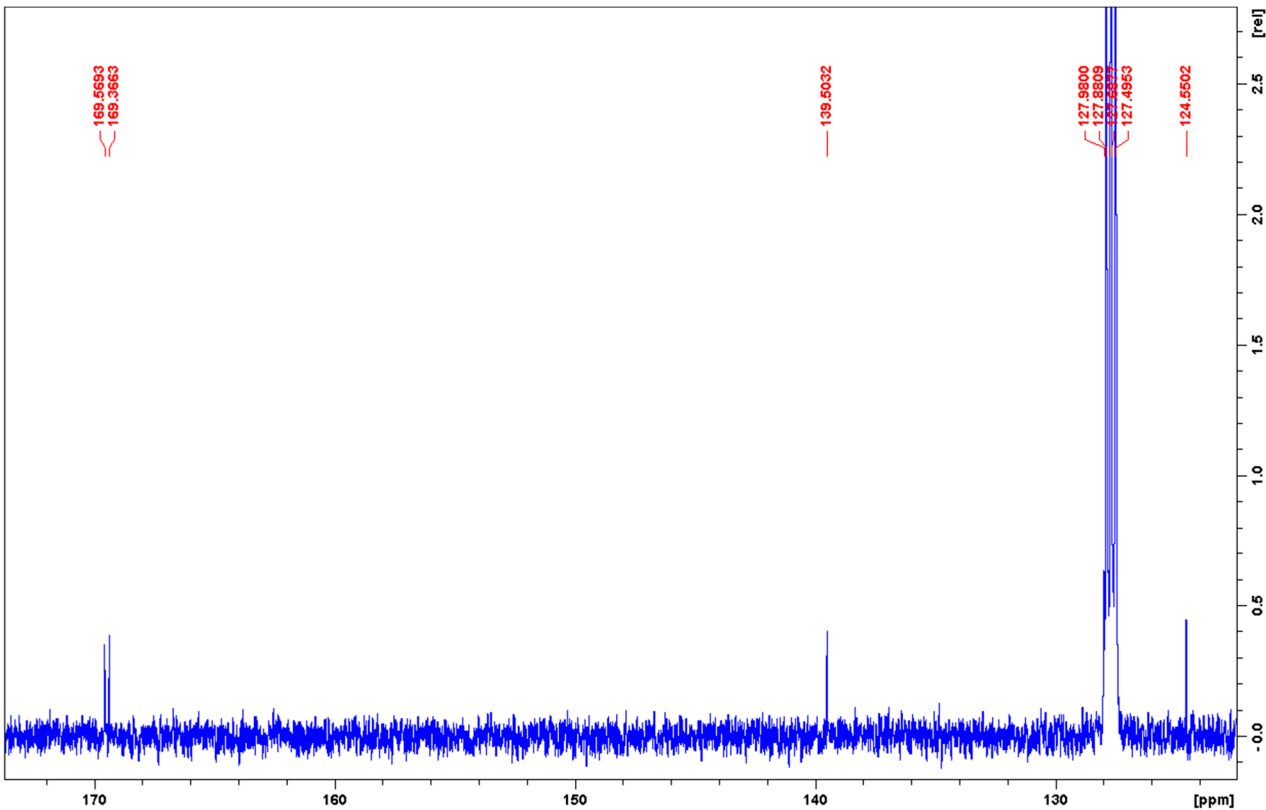

**Figure S12.**  $^{13}\text{C}$ NMR spectrum of **1a** (Exp.).

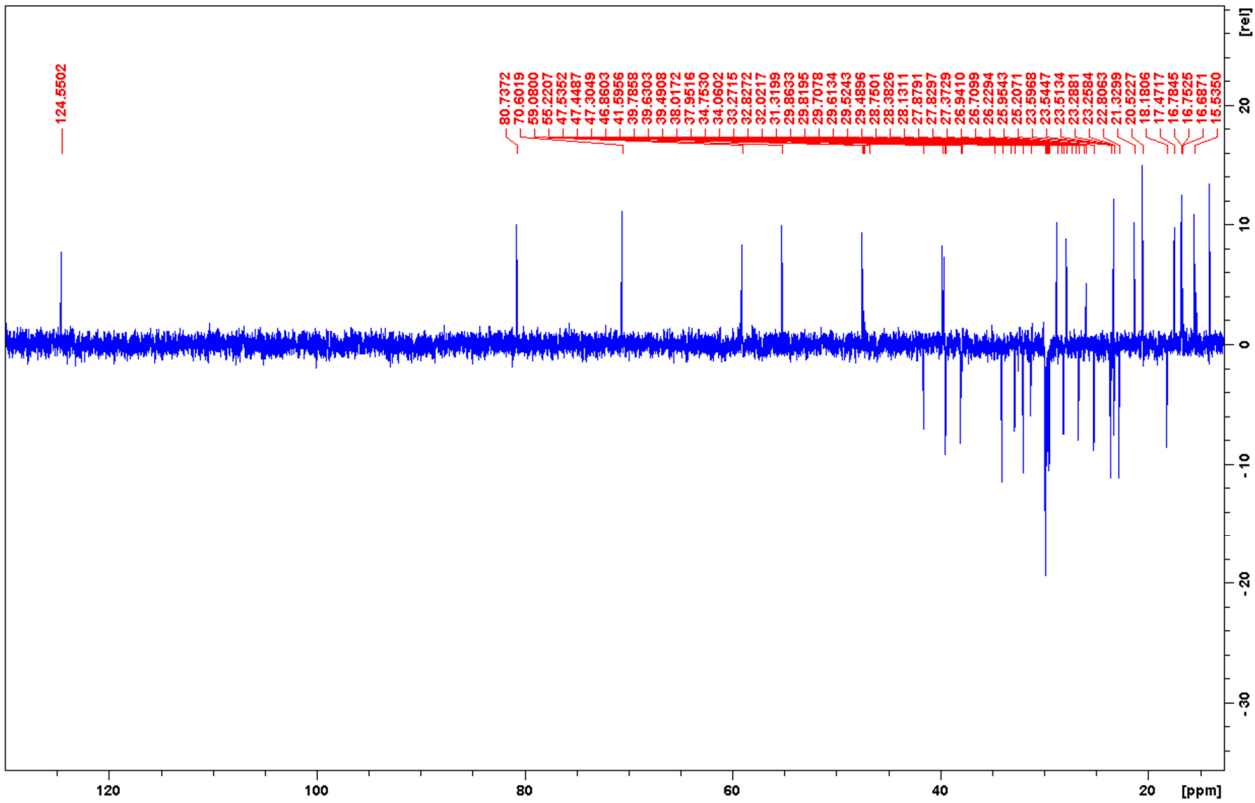

**Figure S13.** DEPT135 spectrum of **1a**.

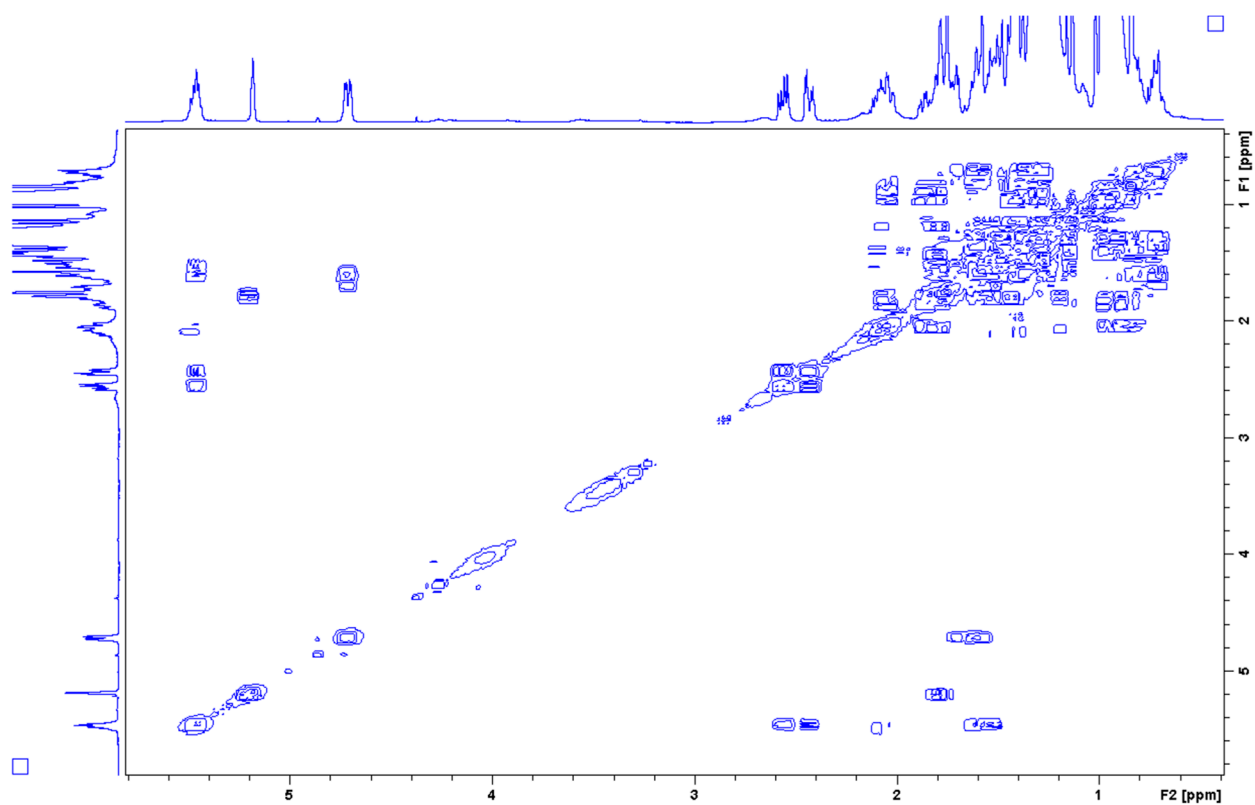

Figure S14. COSY spectrum of 1a.

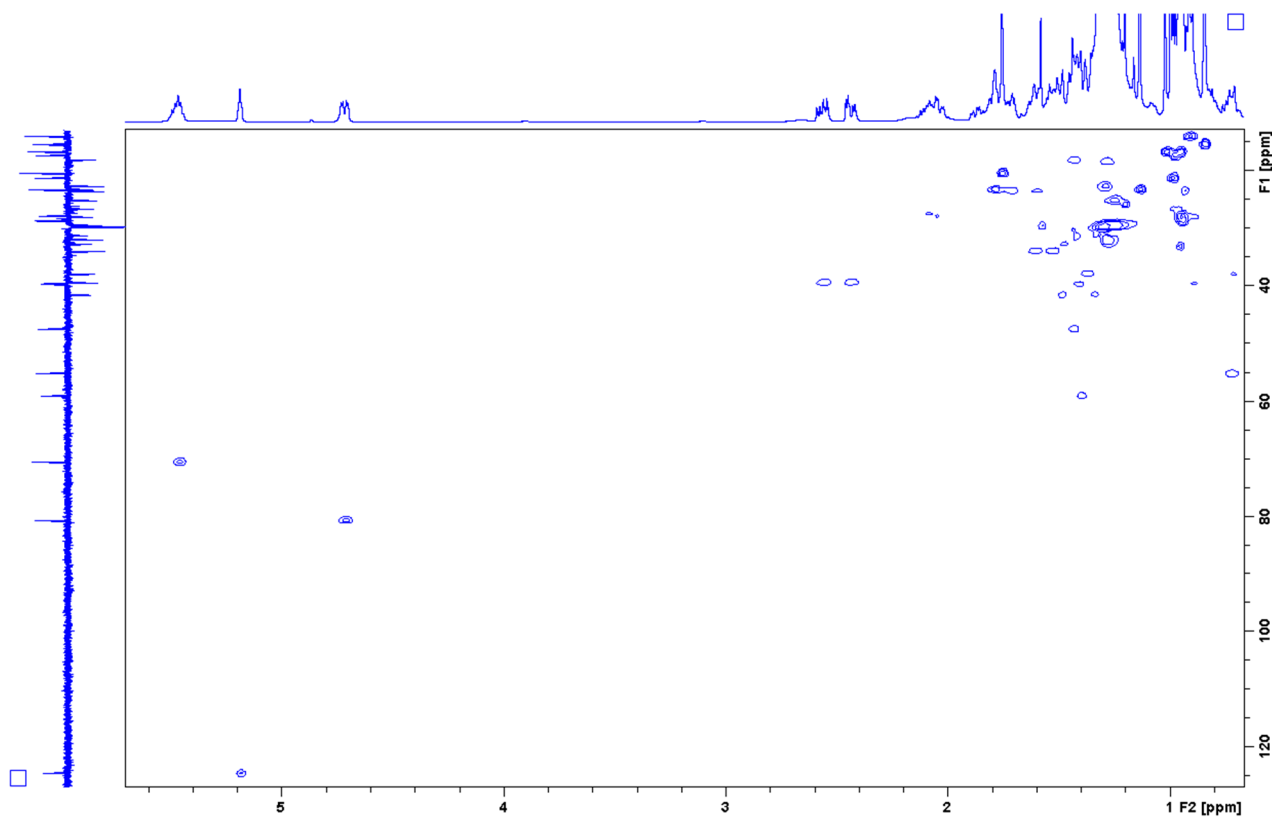

Figure S15. HSQC spectrum of 1a.



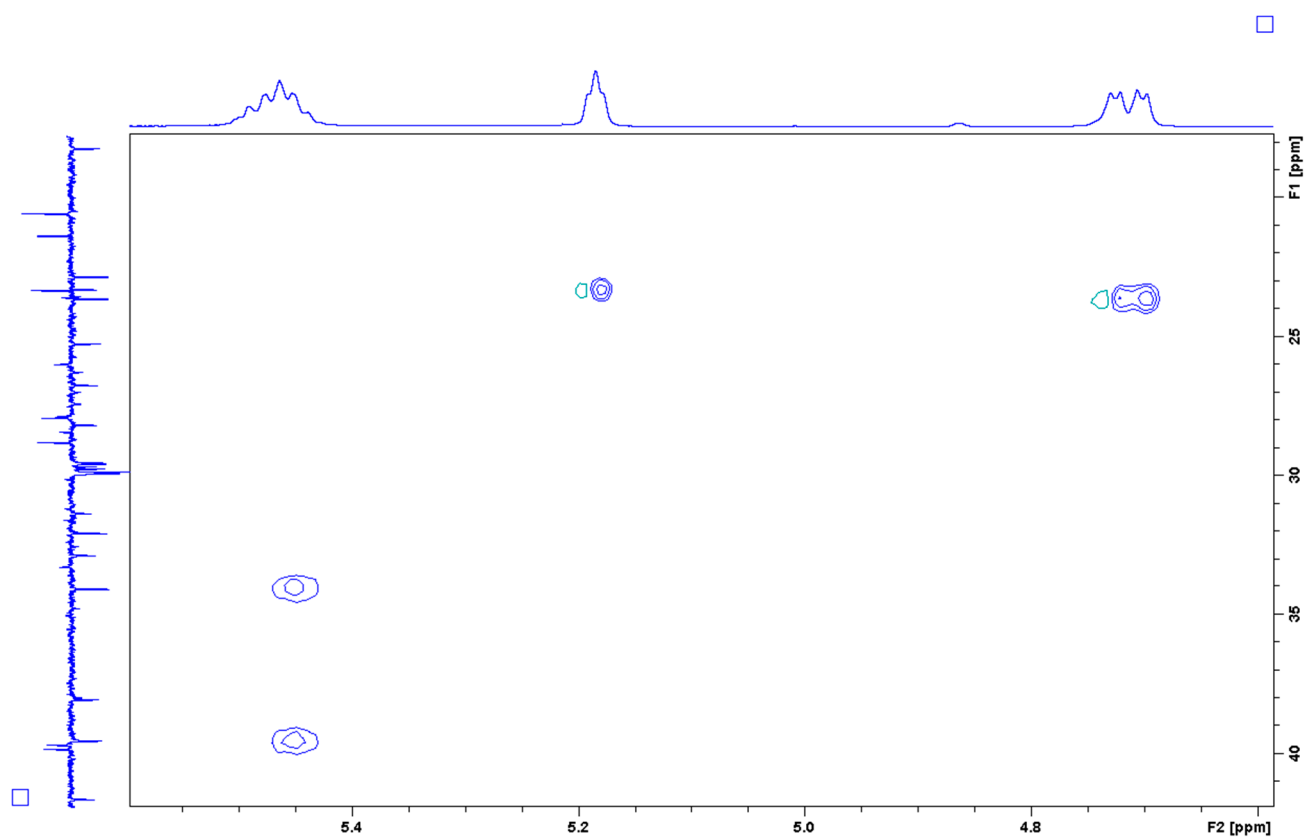Figure S16. H2BC spectrum of **1a** (Exp.).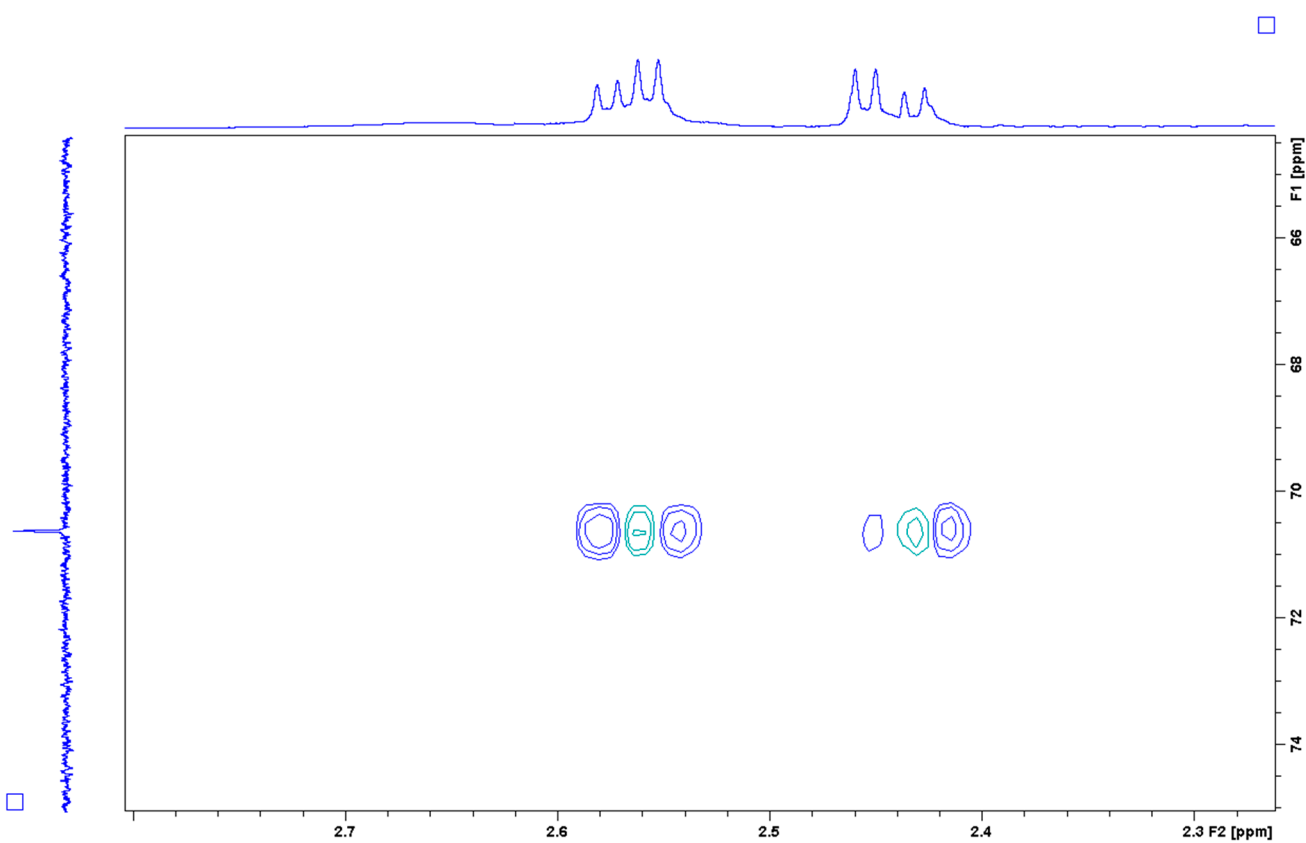Figure S17. H2BC spectrum of **1a** (Exp.).

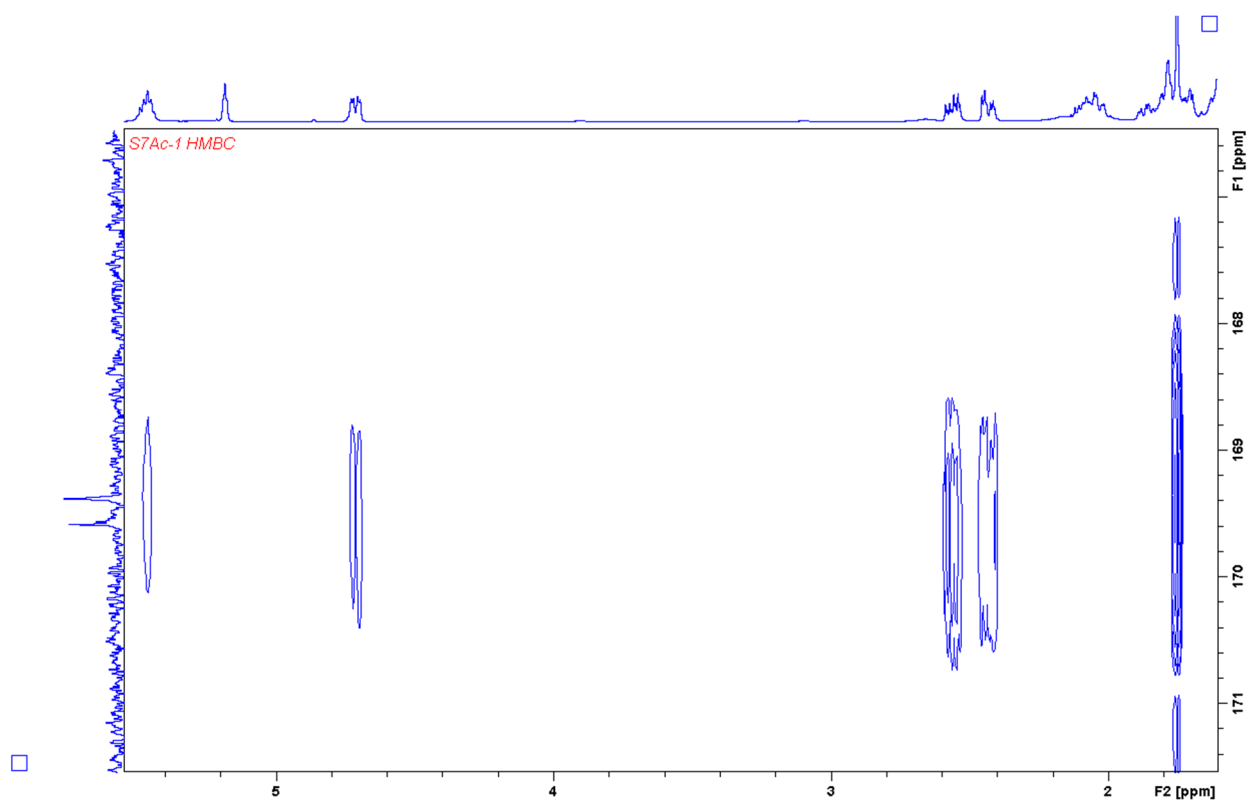

Figure S18. HMBC spectrum of 1a (Exp.).

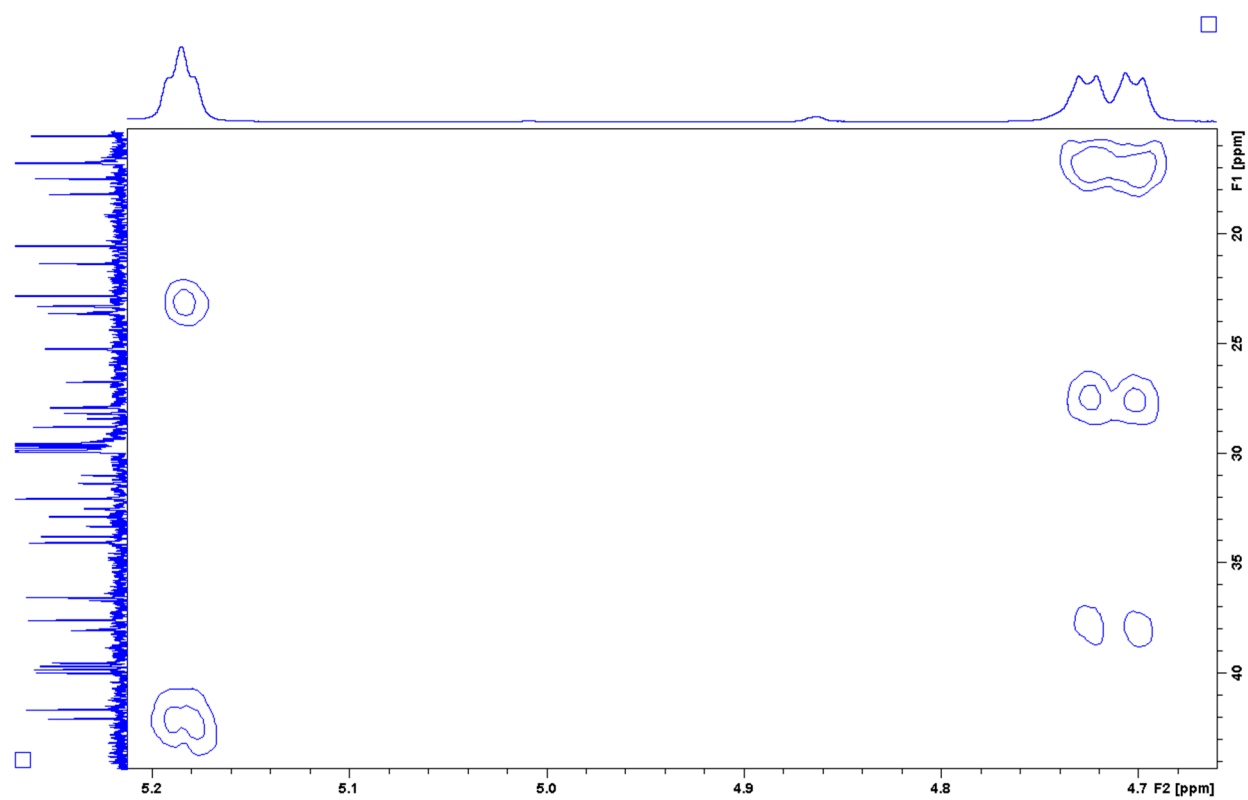

Figure S19. HMBC spectrum of 1a (Exp.).

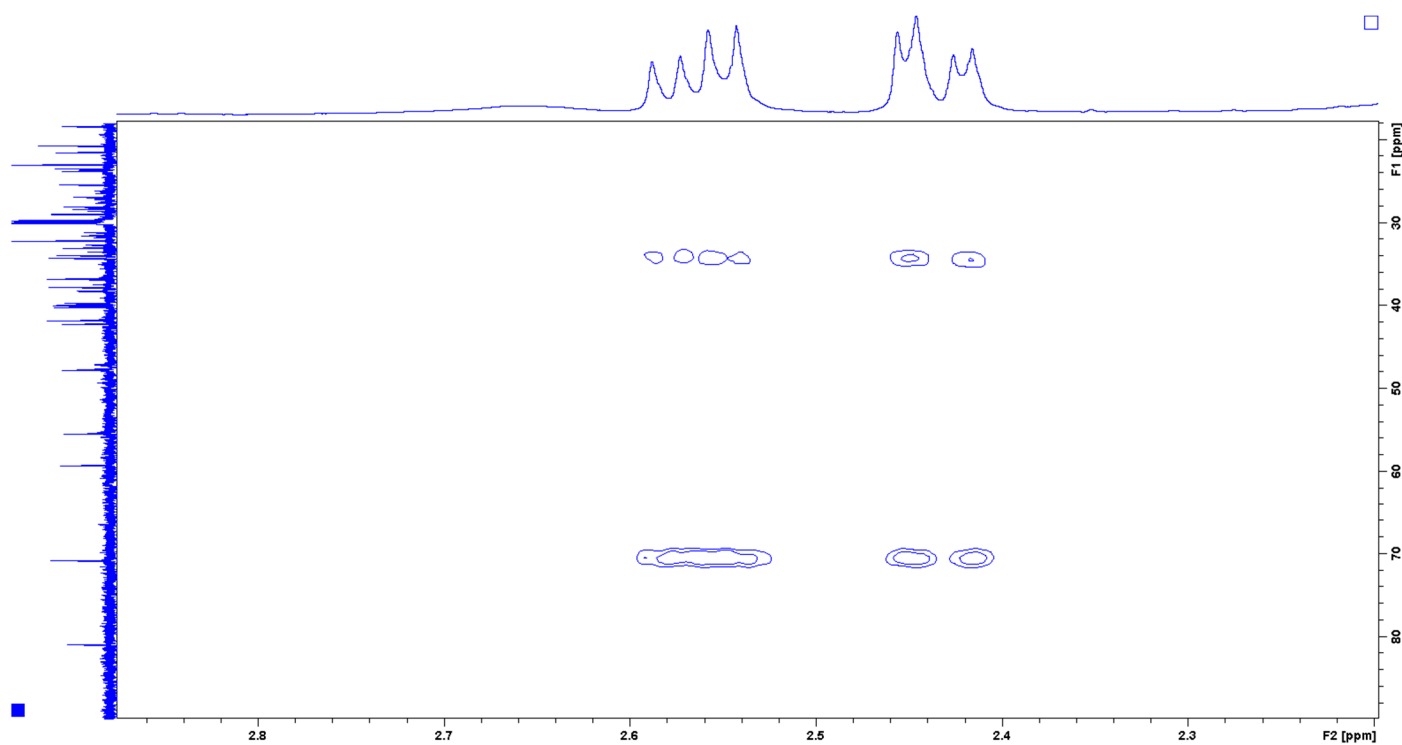

Figure S20. HMBC spectrum of 1a (Exp.).

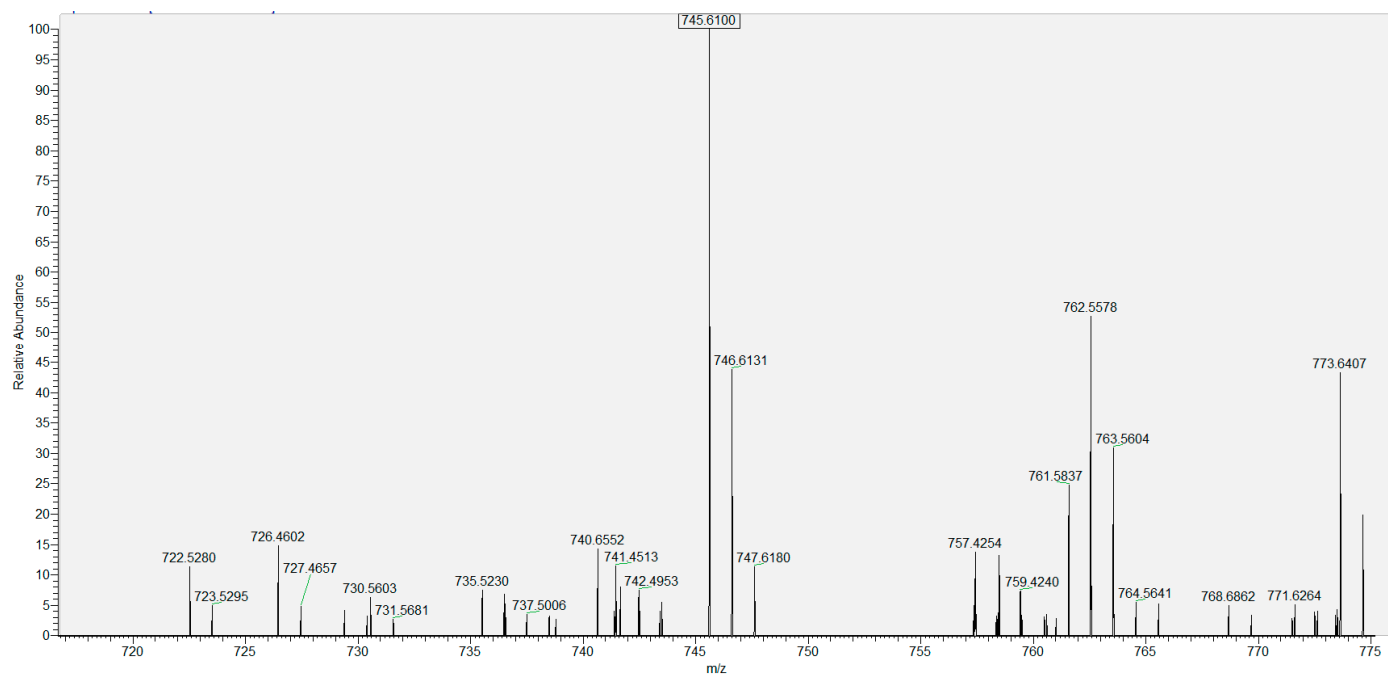

Figure S21. HRESIMS spectrum of 1a (Positive mode).

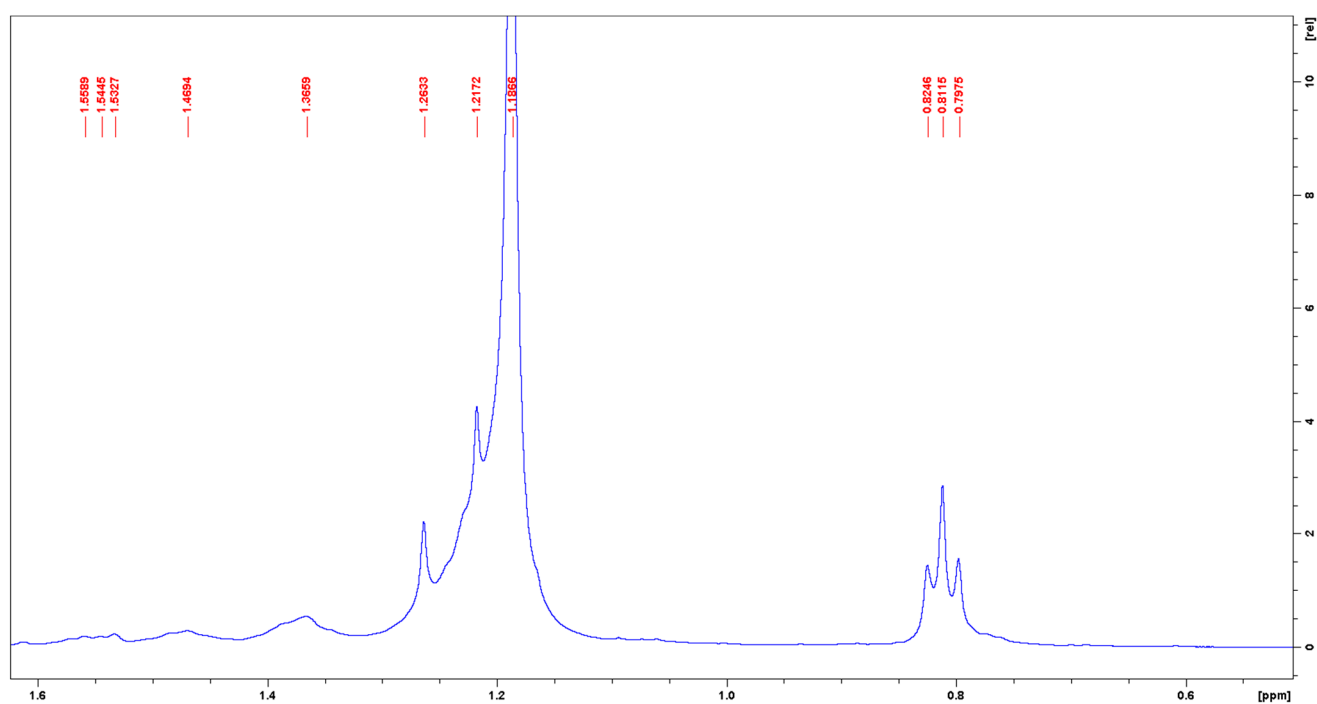Figure S22. <sup>1</sup>H NMR spectrum of **1b** (Exp.).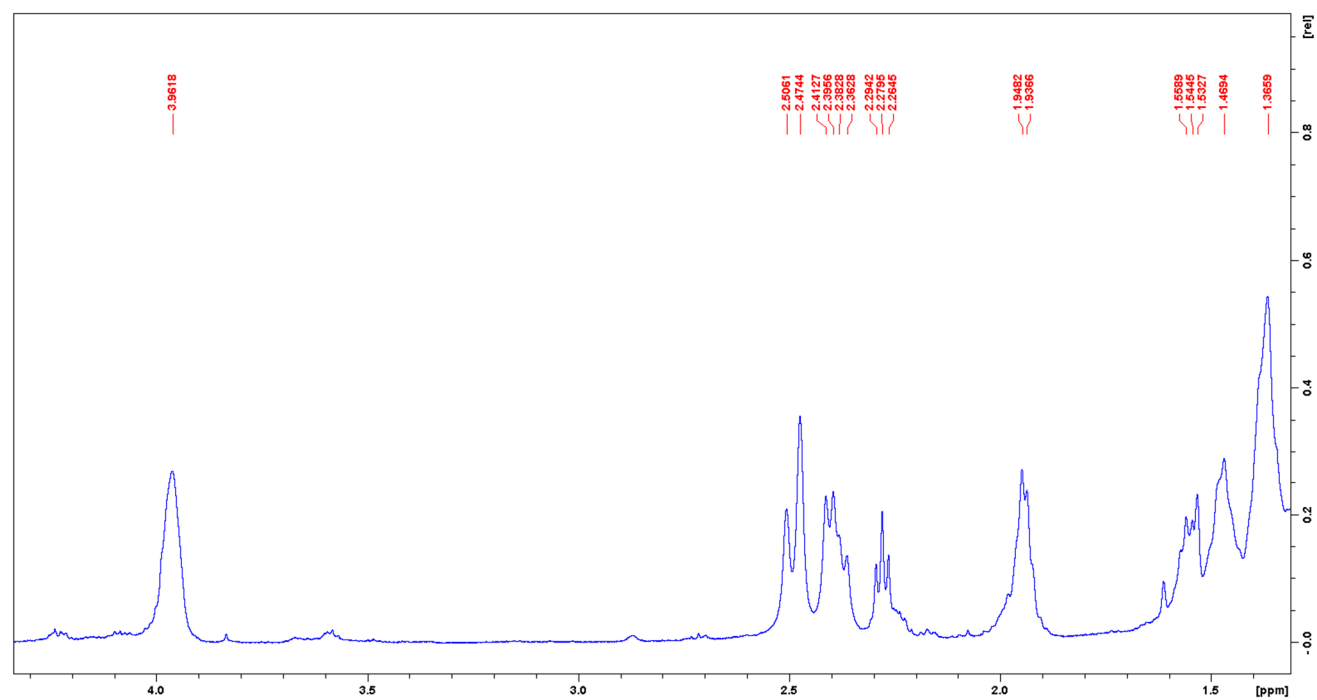Figure S23. <sup>1</sup>H NMR spectrum of **1b** (Exp.).

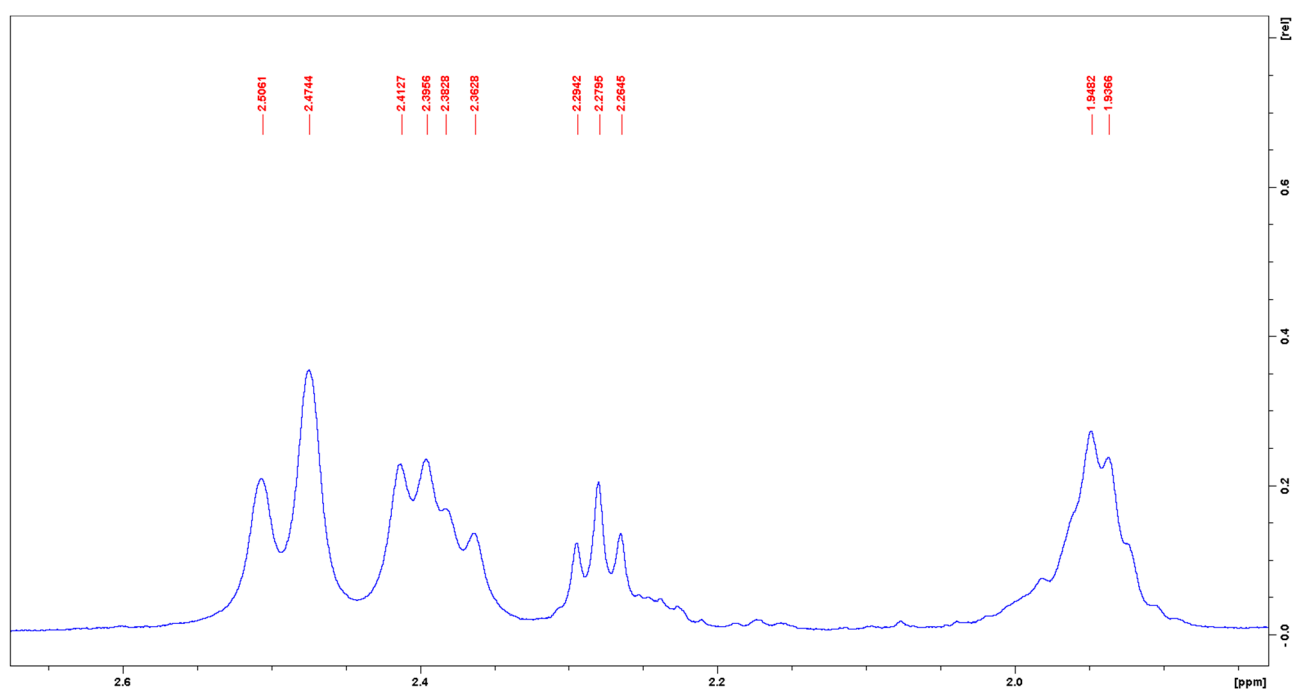Figure S24.  $^1\text{H}$ NMR spectrum of **1b** (Exp.).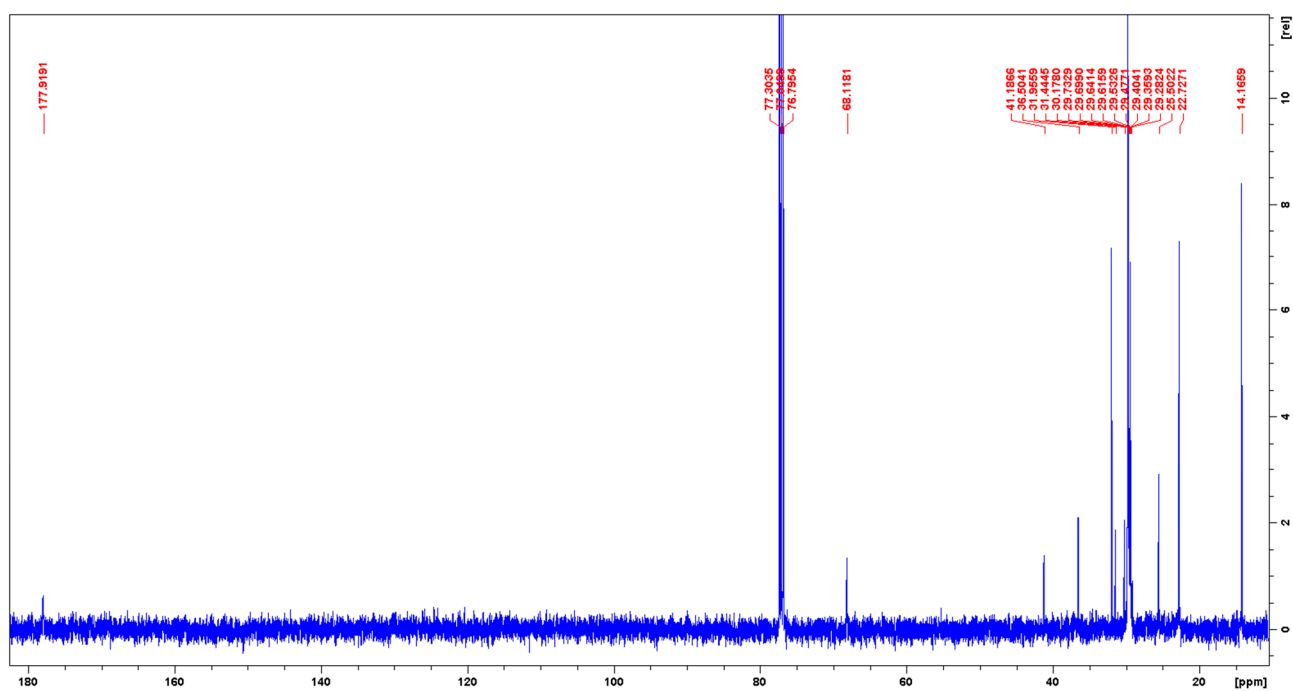Figure S25.  $^{13}\text{C}$ NMR spectrum of **1b**.

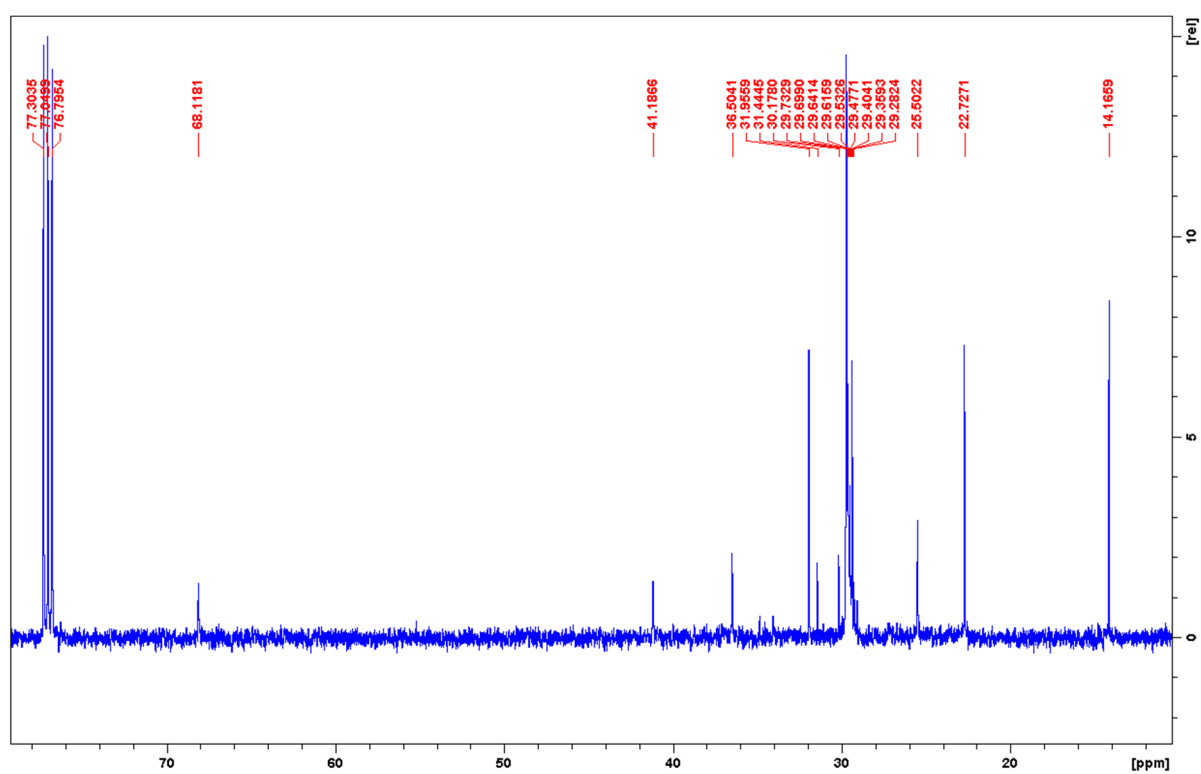Figure S26. <sup>13</sup>C NMR spectrum of **1b** (Exp.).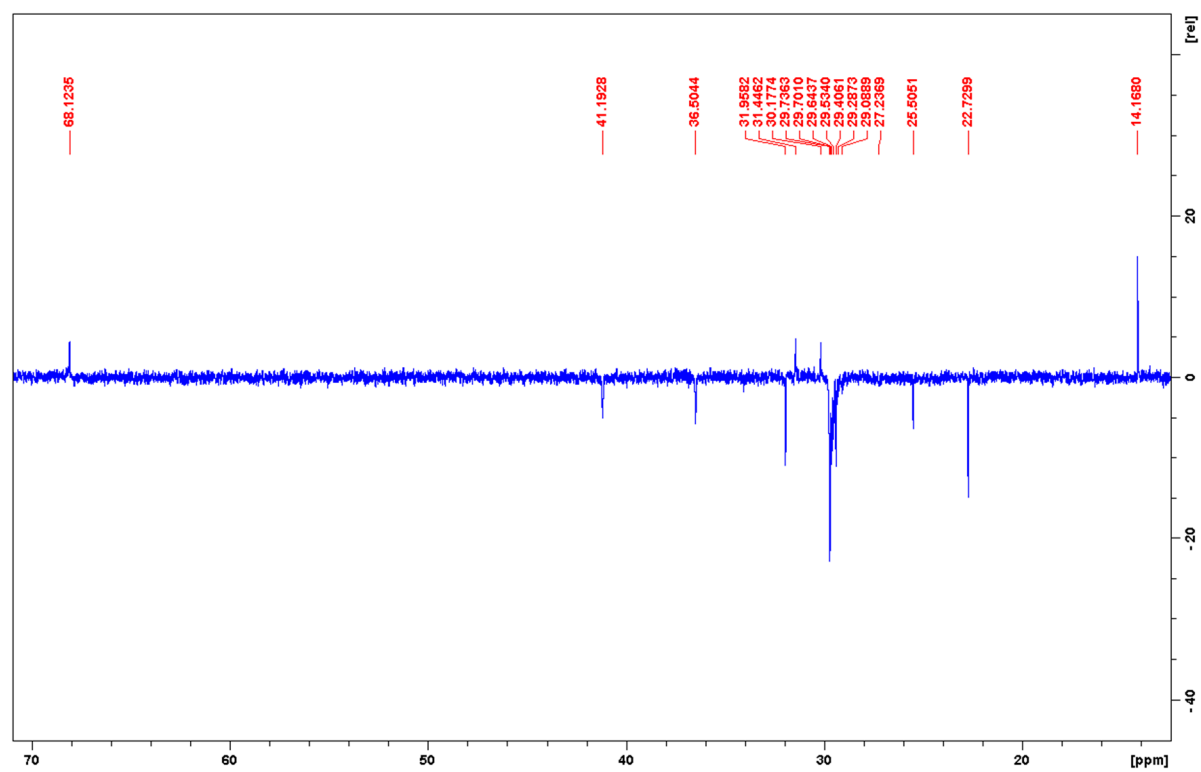Figure S27. DEPT135 spectrum of **1b**.

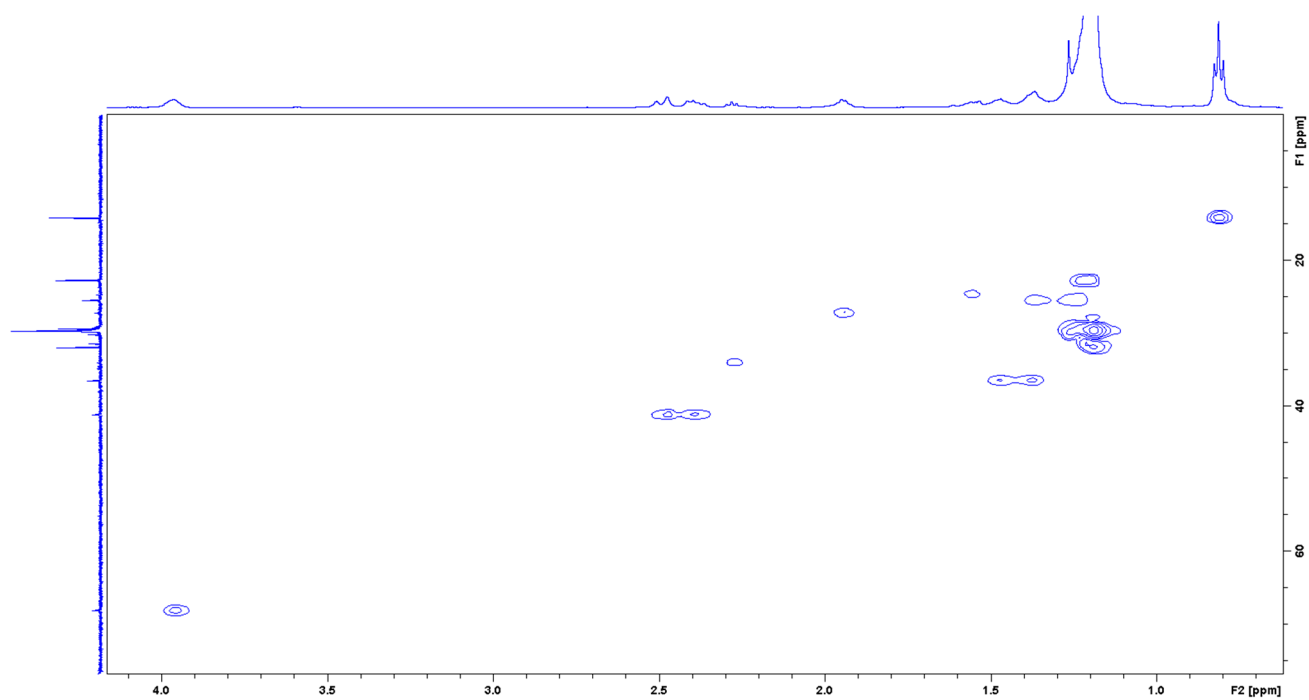

Figure S28. HSQC spectrum of **1b**.

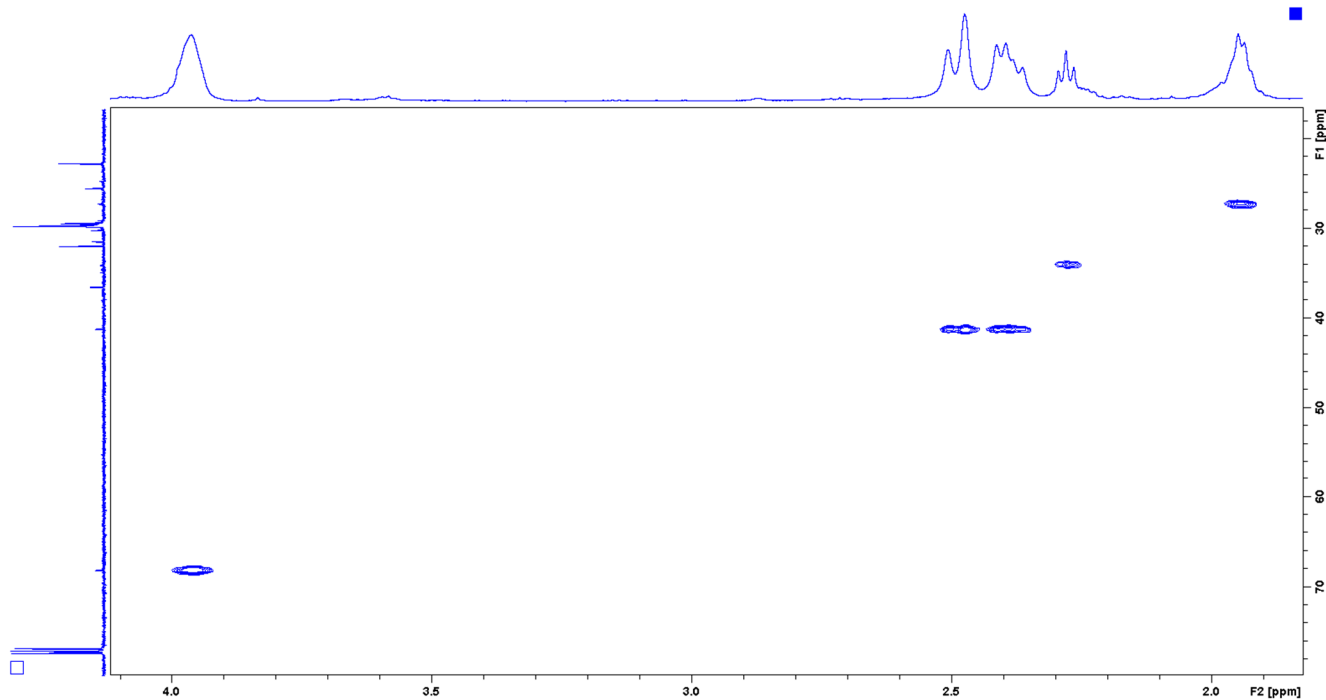

Figure S29. HSQC spectrum of **1b** (Exp.).

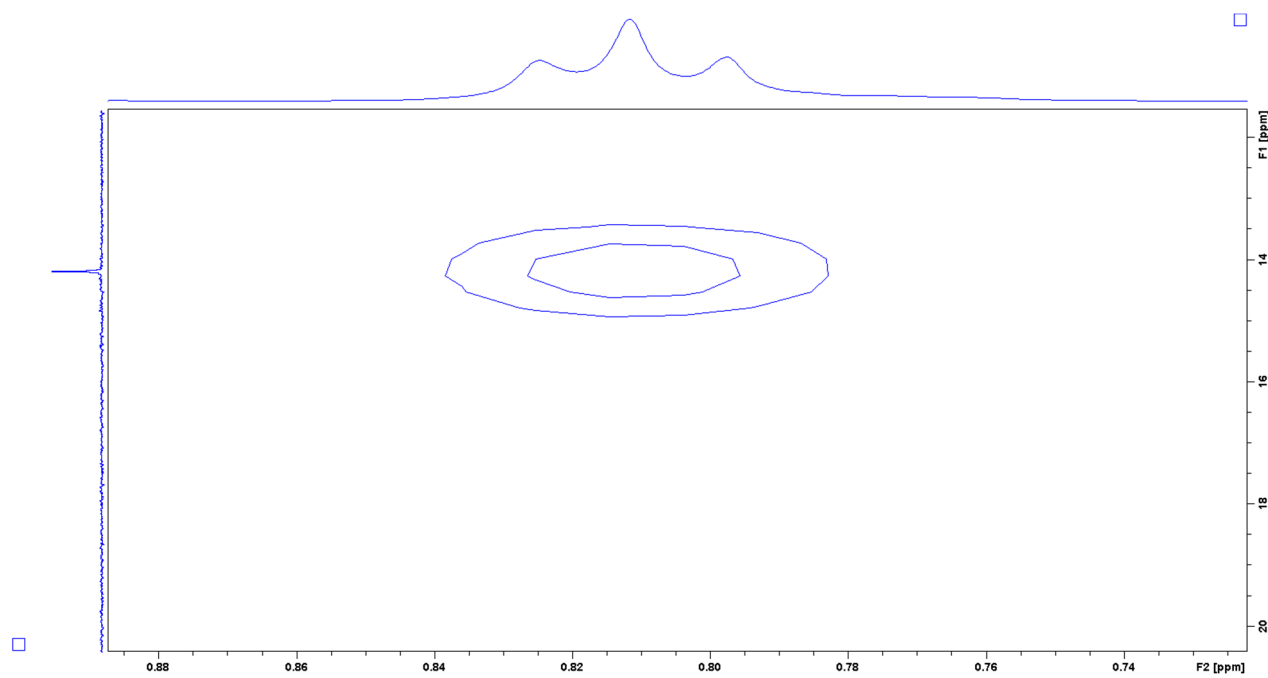

Figure S30. HSQC spectrum of **1b** (Exp.).

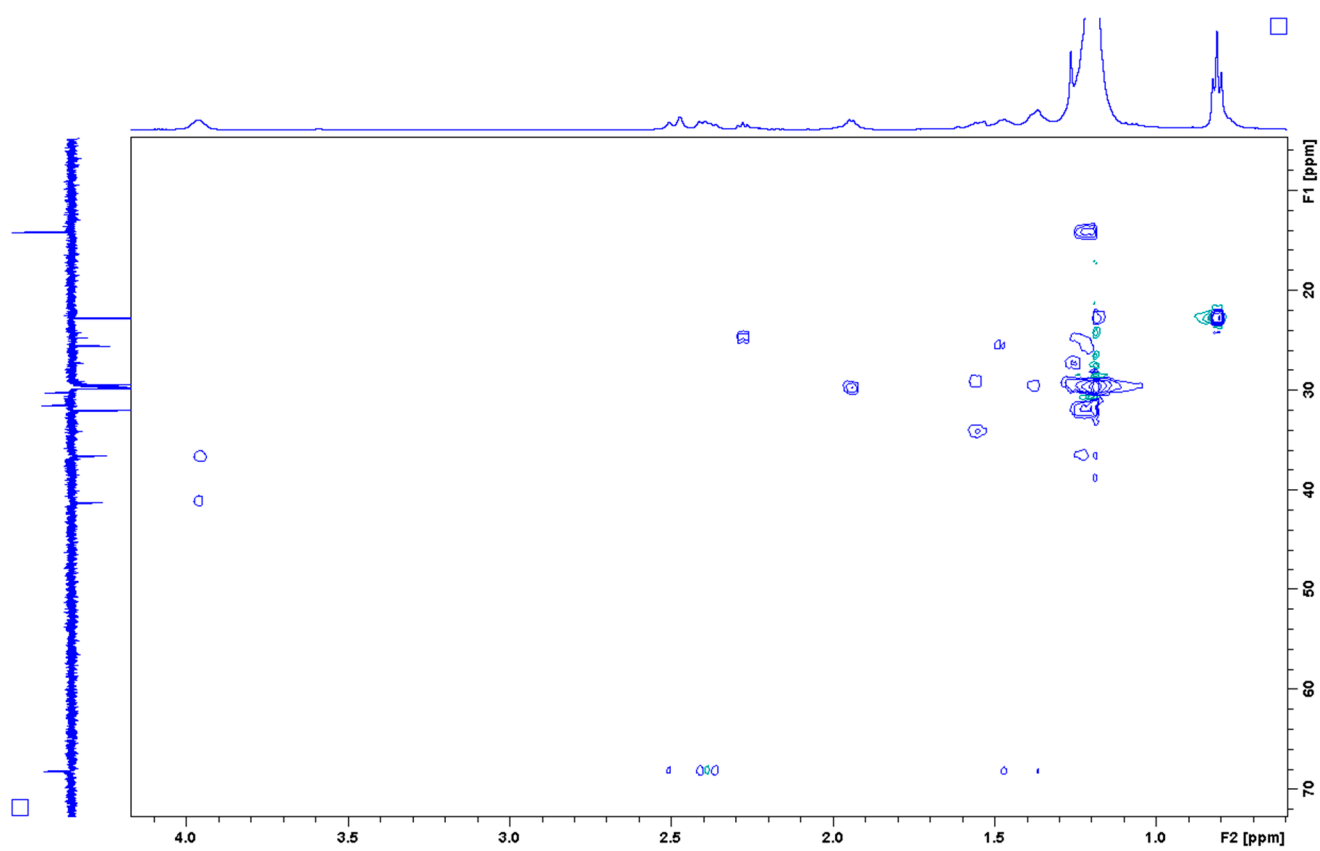

Figure S31. H2BC spectrum of **1b**.



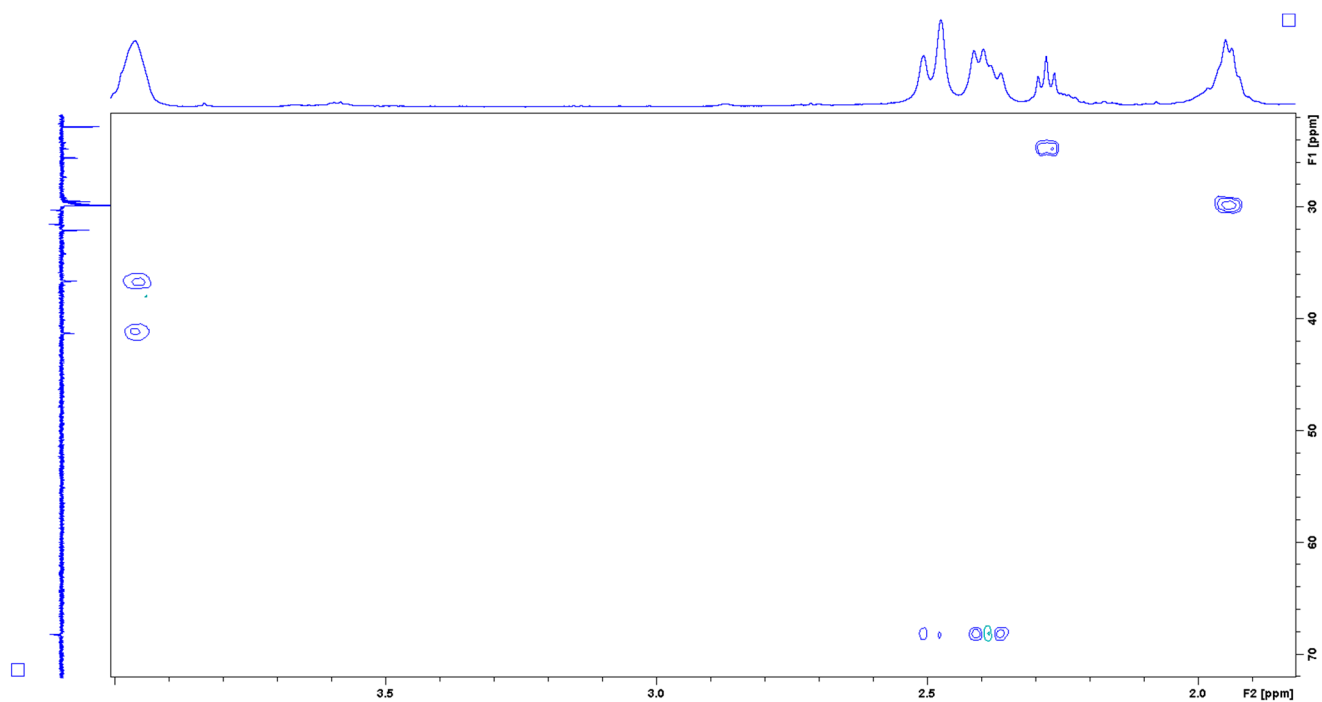

Figure S32. H2BC spectrum of **1b** (Exp.).

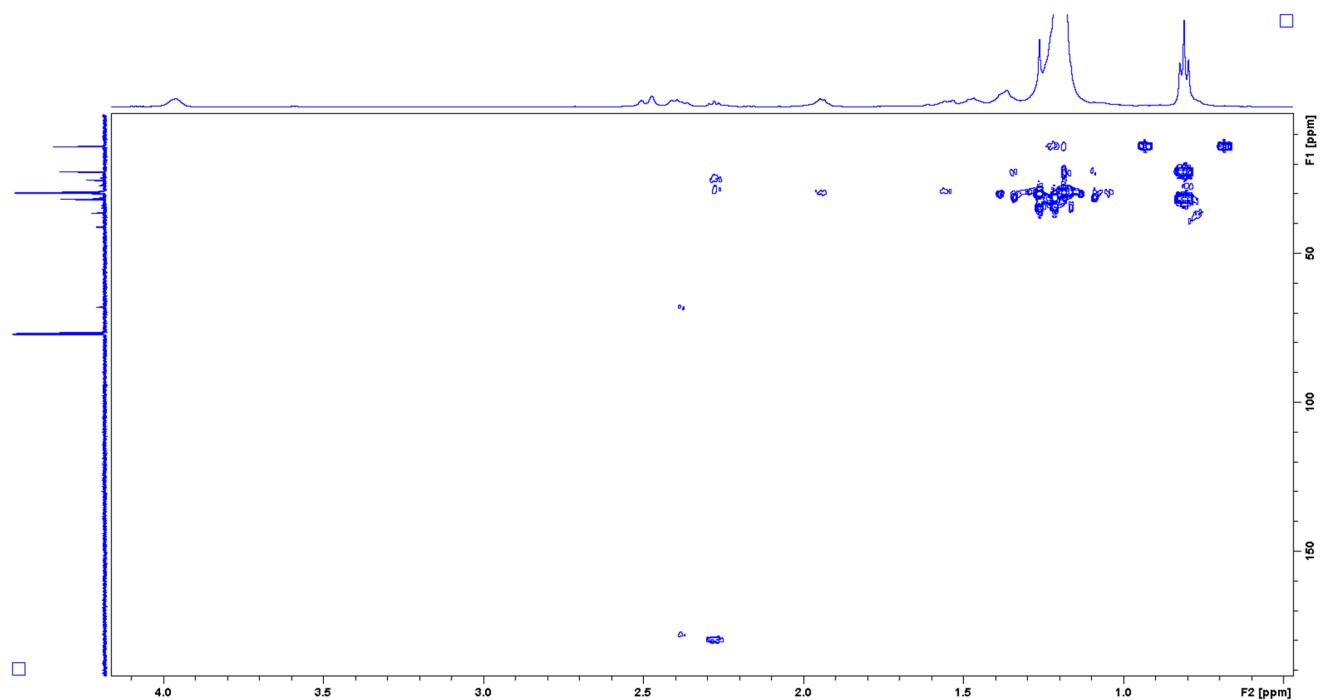

Figure S33. HMBC spectrum of **1b**.

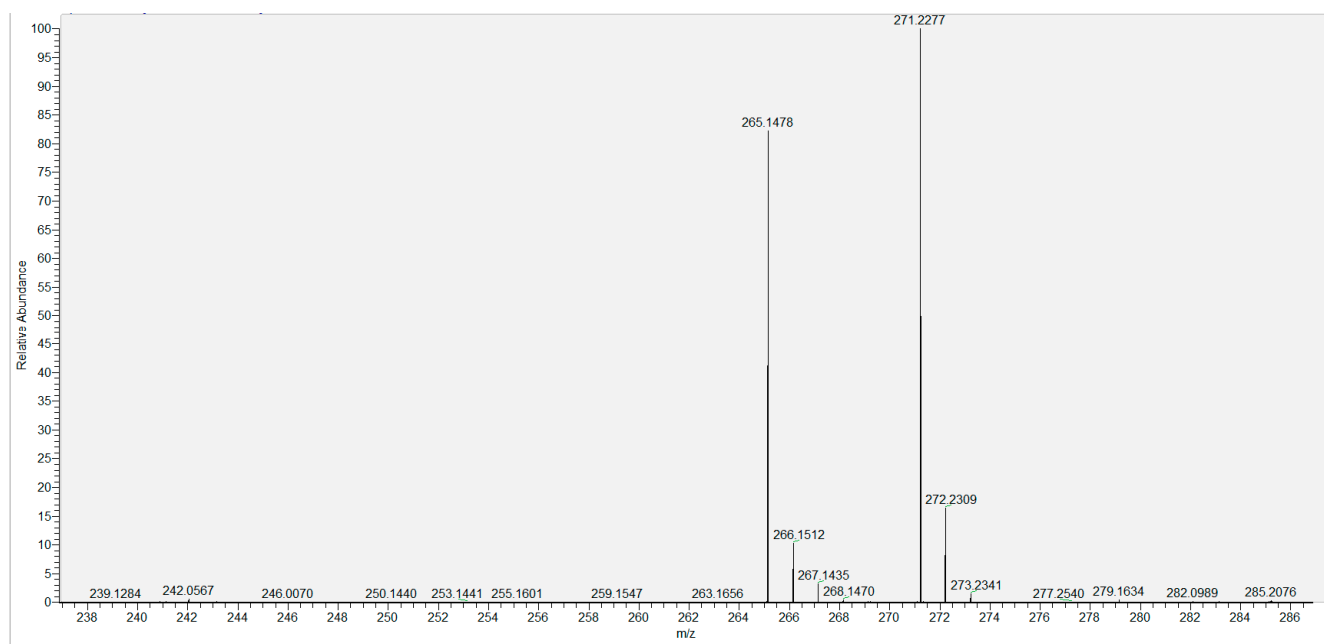

Figure S34. HRESIMS spectrum of **1b** (Negative mode).

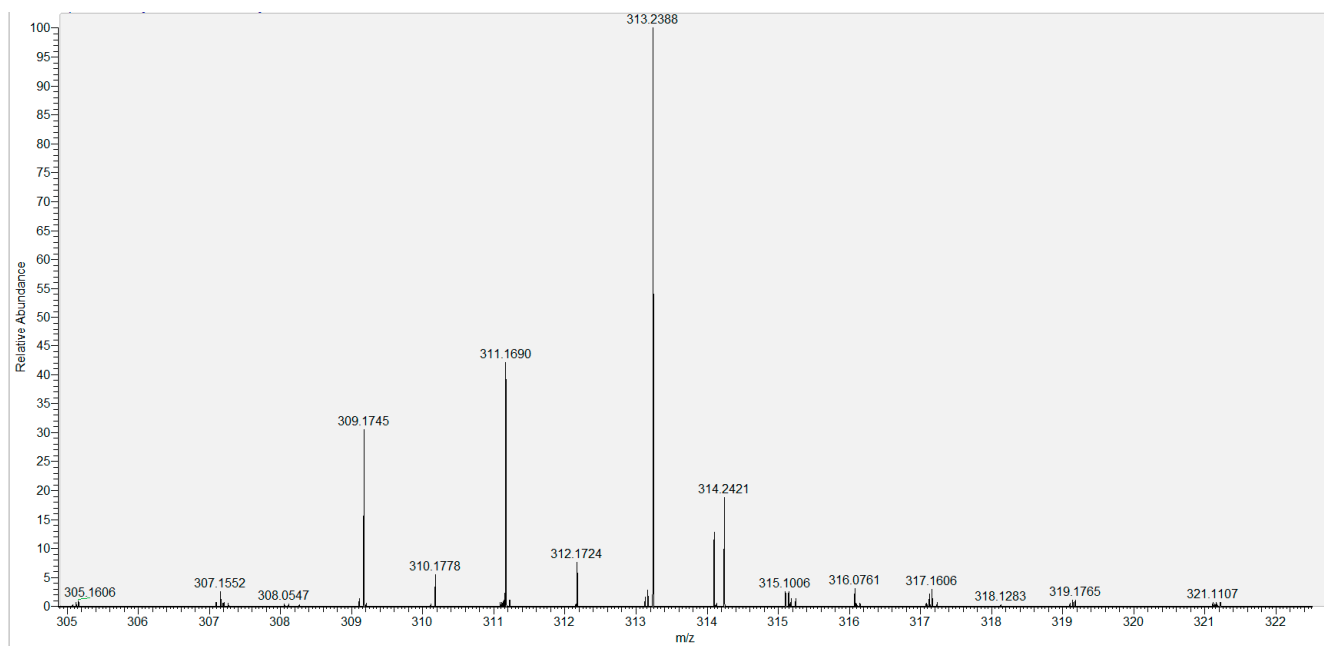

Figure S35. HRESIMS spectrum of **1b Ac** (Negative mode).

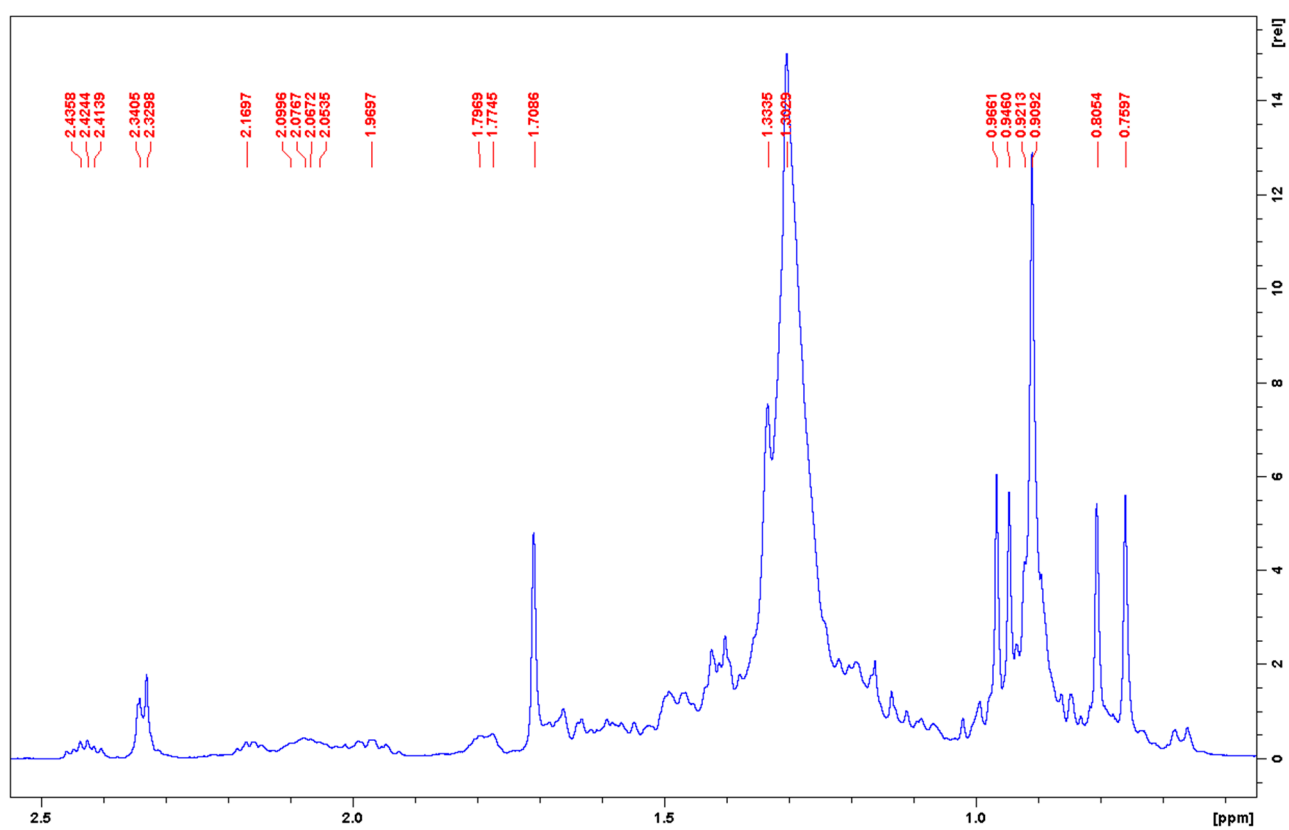

Figure S36.  $^1\text{H}$ NMR spectrum of 2 (Exp.).

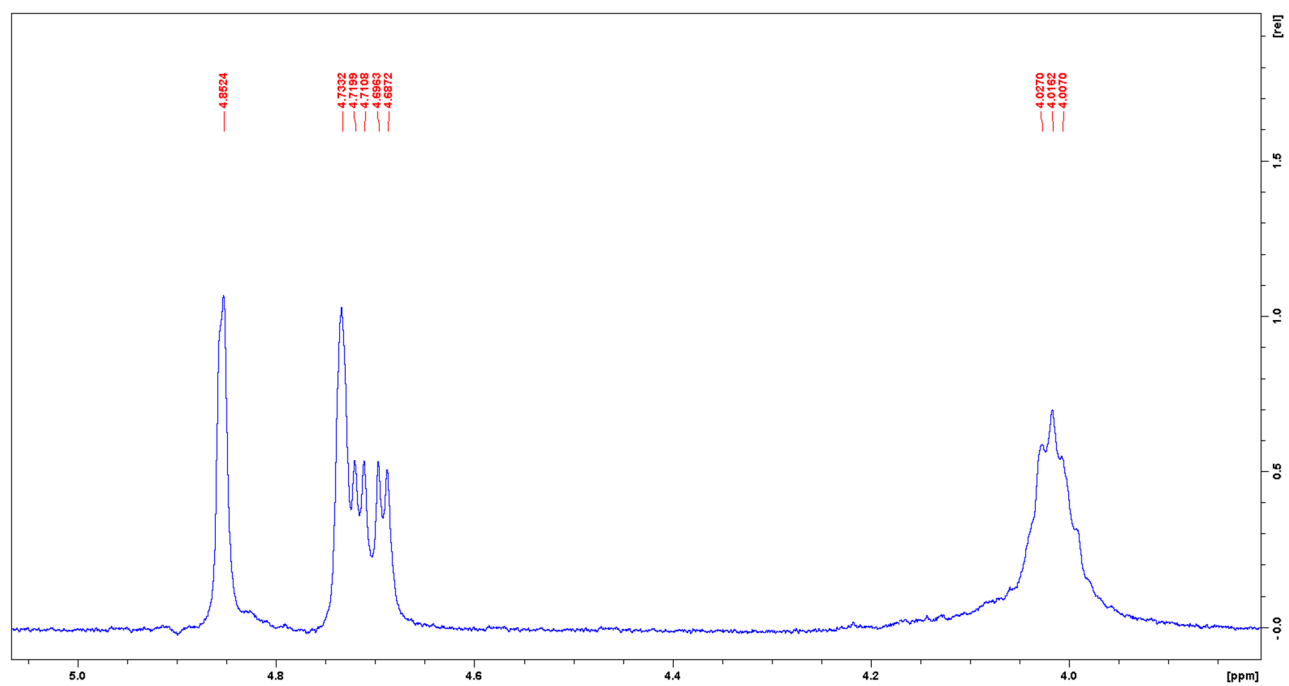

Figure S37.  $^1\text{H}$ NMR spectrum of 2 (Exp.).

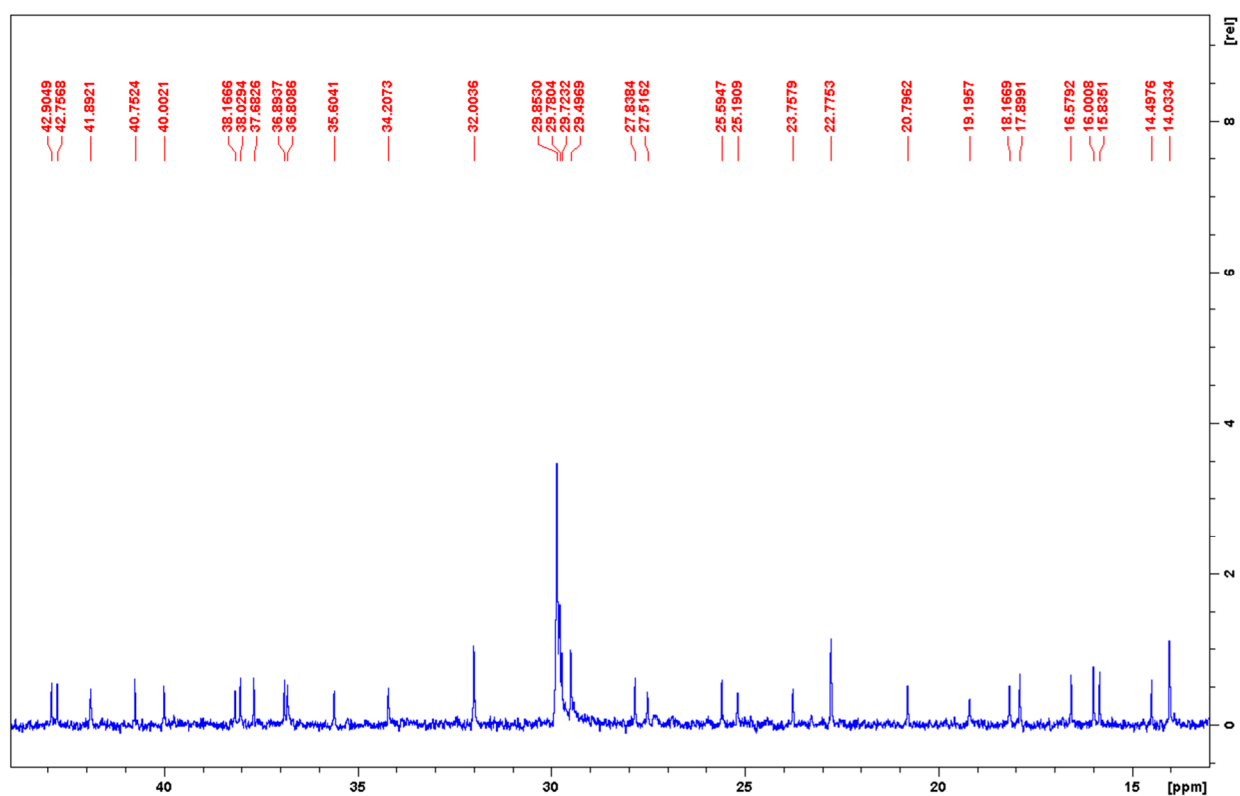Figure S38. <sup>13</sup>CNMR spectrum of 2 (Exp.).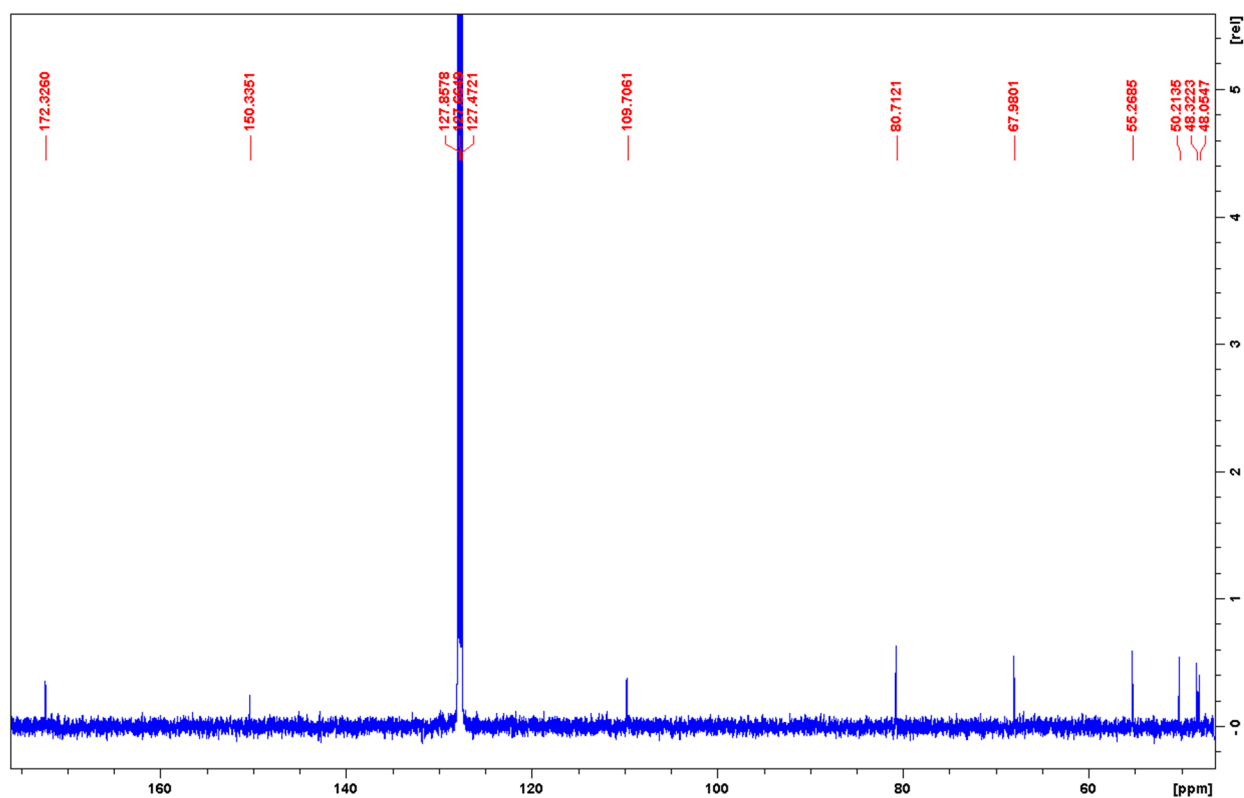Figure S39. <sup>13</sup>CNMR spectrum of 2 (Exp.).

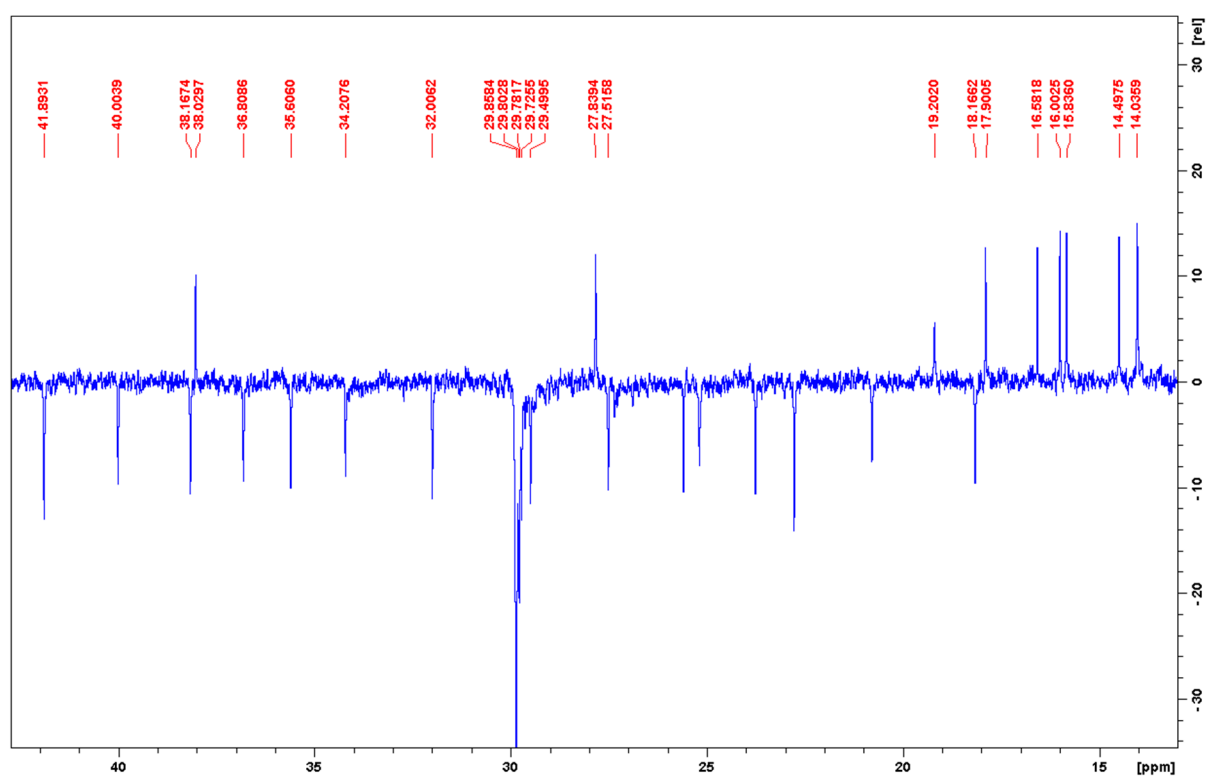

Figure S40. DEPT135 spectrum of 2 (Exp.).

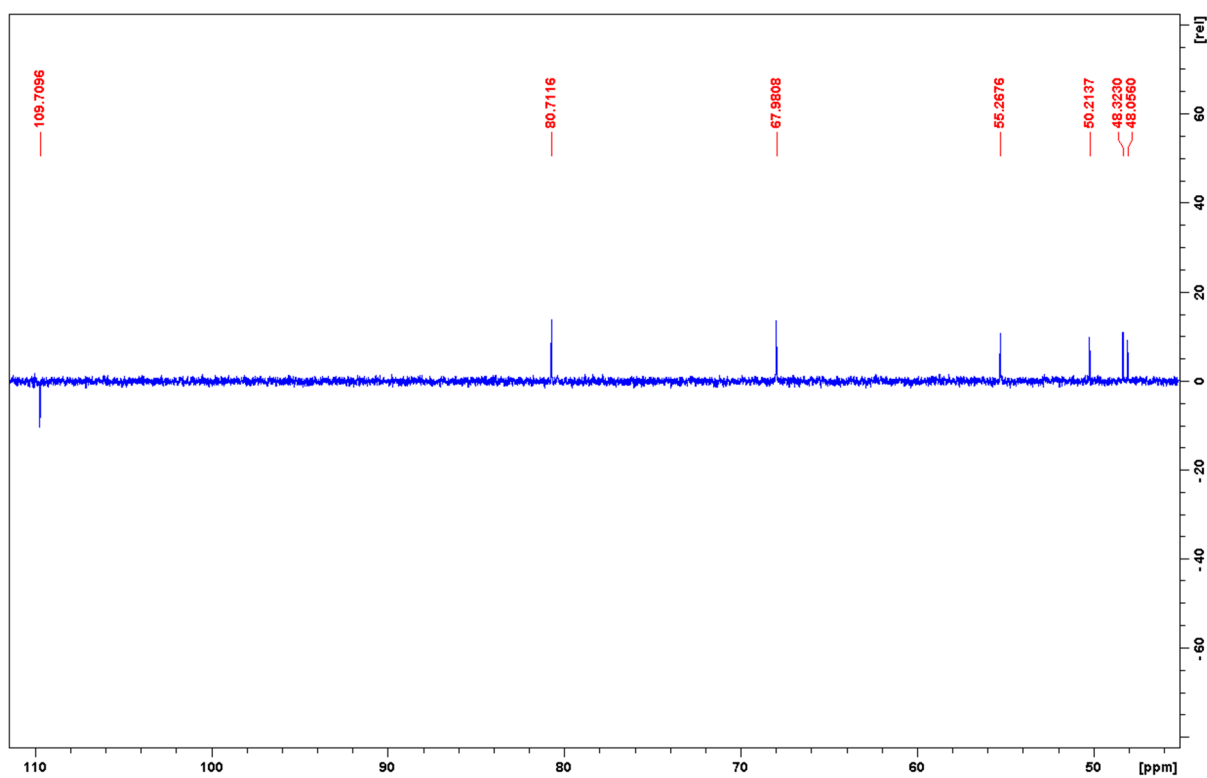

Figure S41. DEPT135 spectrum of 2 (Exp.).

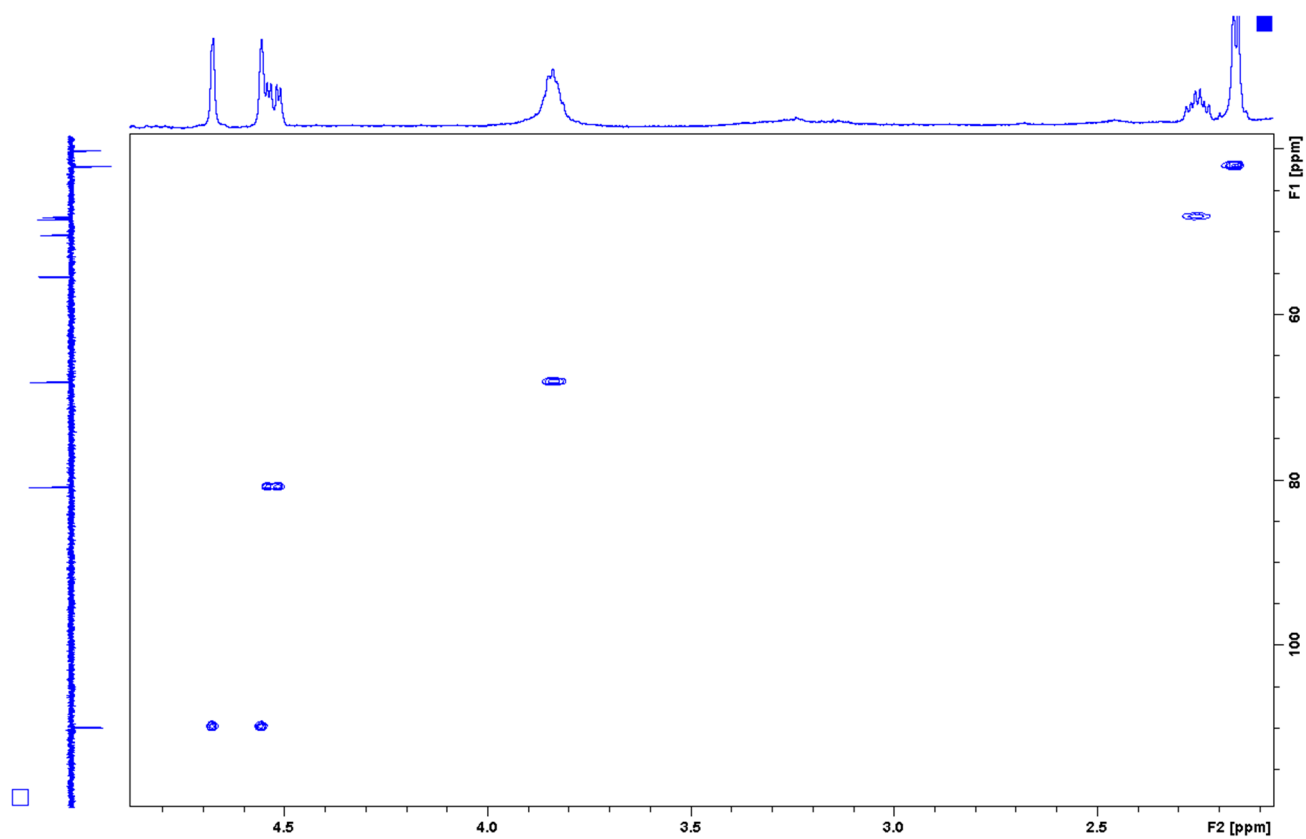

Figure S42. HSQC spectrum of 2 (Exp.).

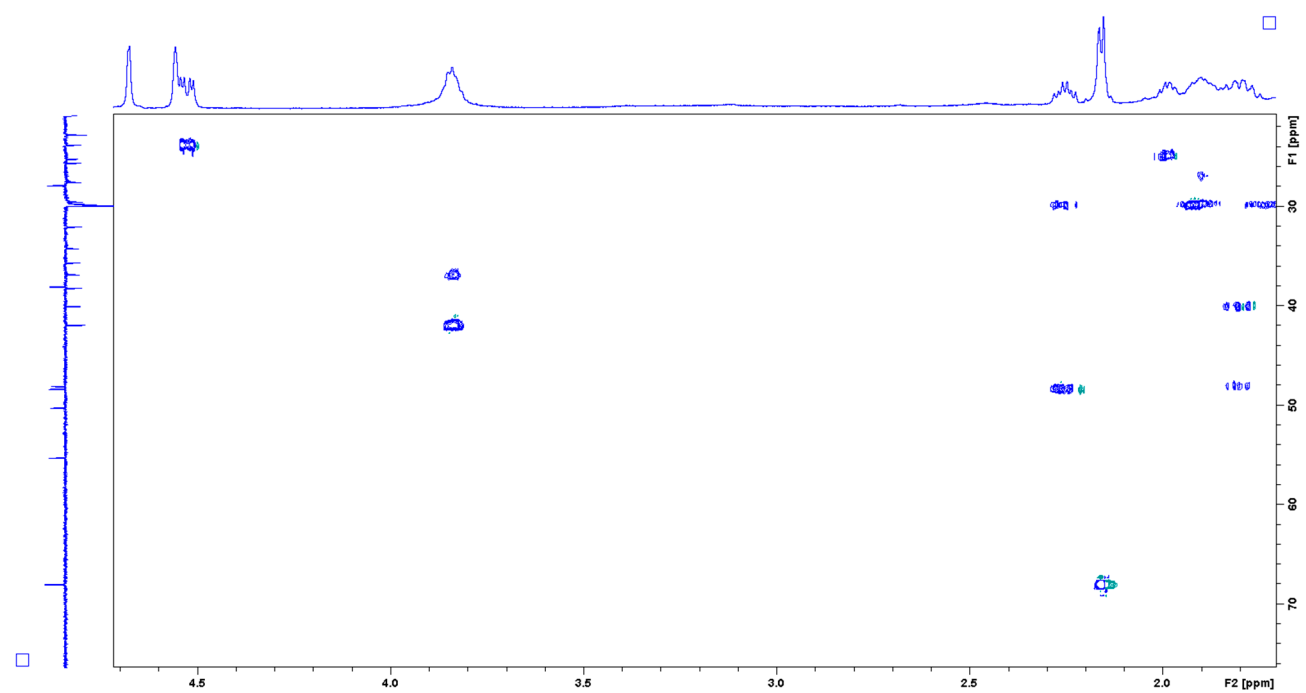

Figure S43. H2BC spectrum of 2 (Exp.).

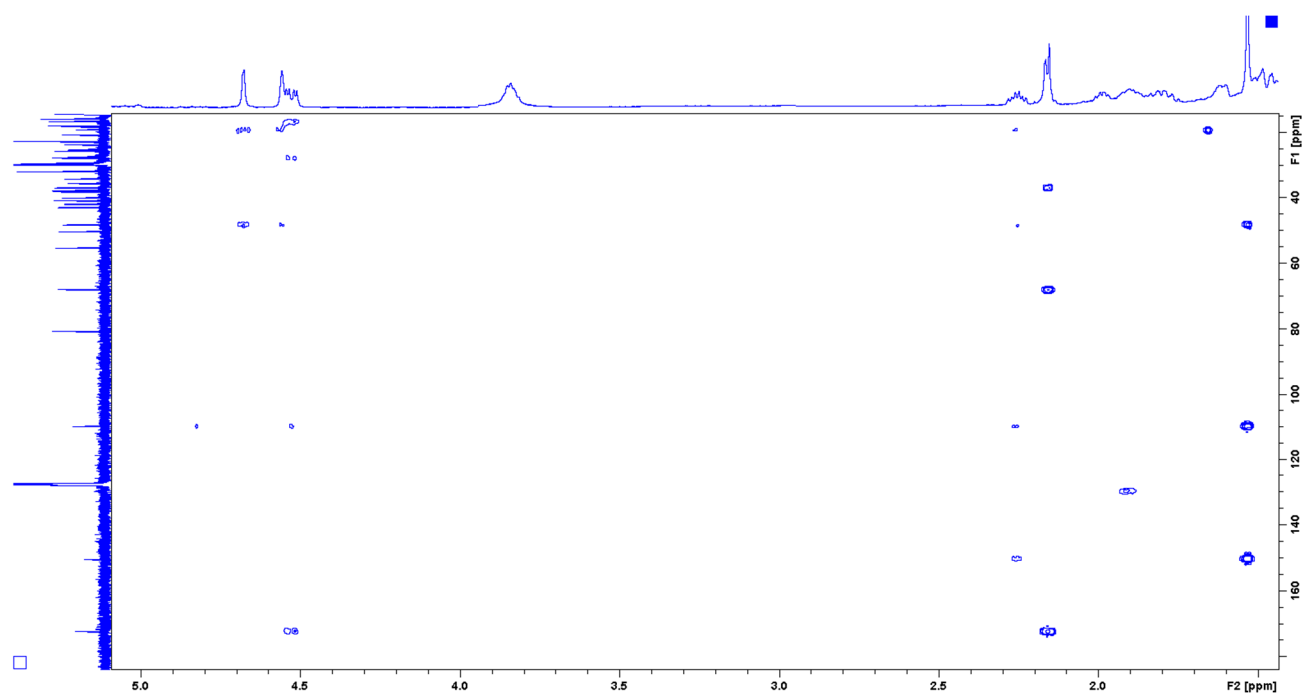

Figure S44. HMBC spectrum of **2** (Exp.).

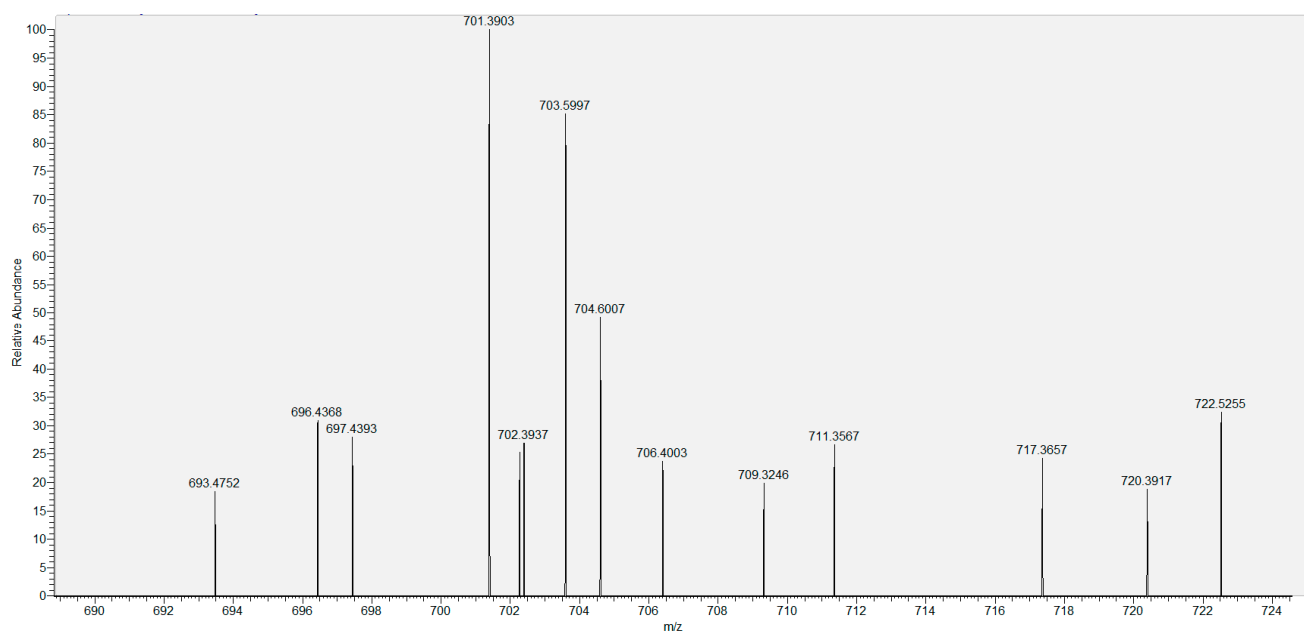

Figure S45. HRSIMS spectrum of **2** (Positive mode).

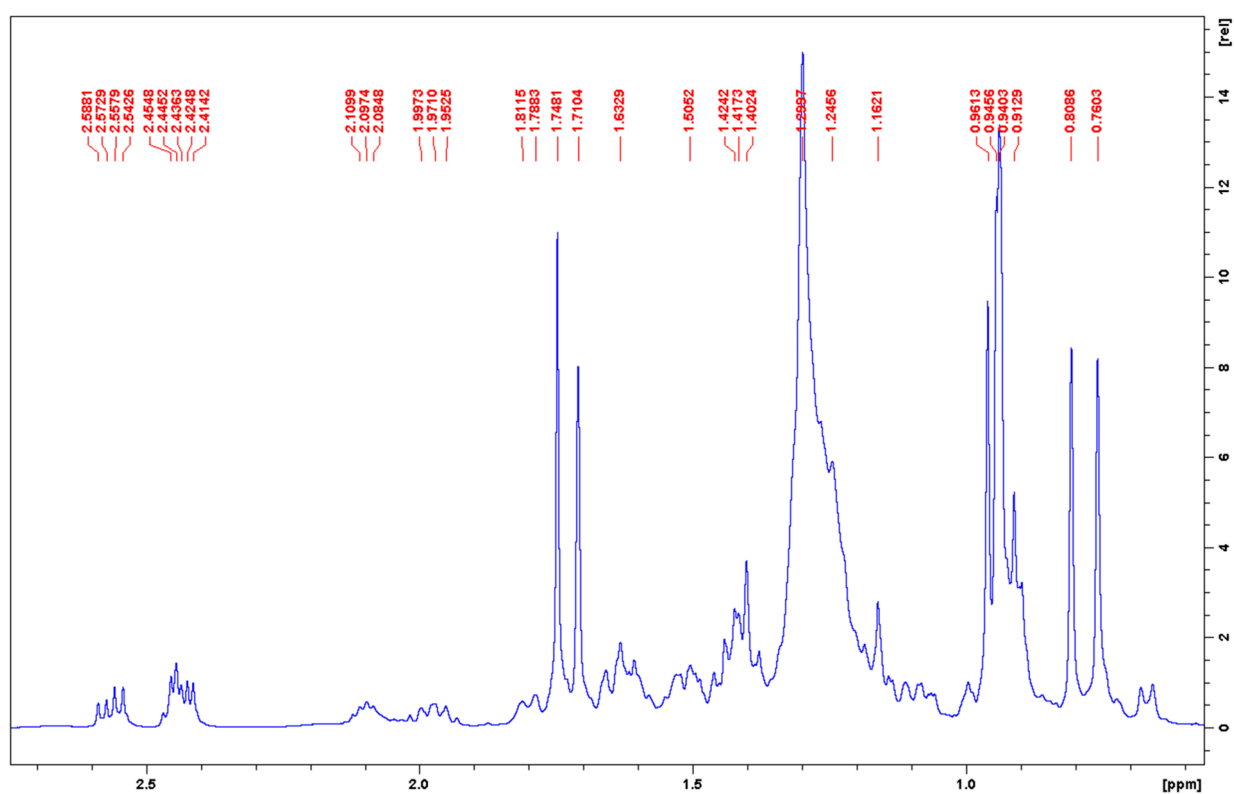Figure S46. <sup>1</sup>H NMR spectrum of 2a (Exp.).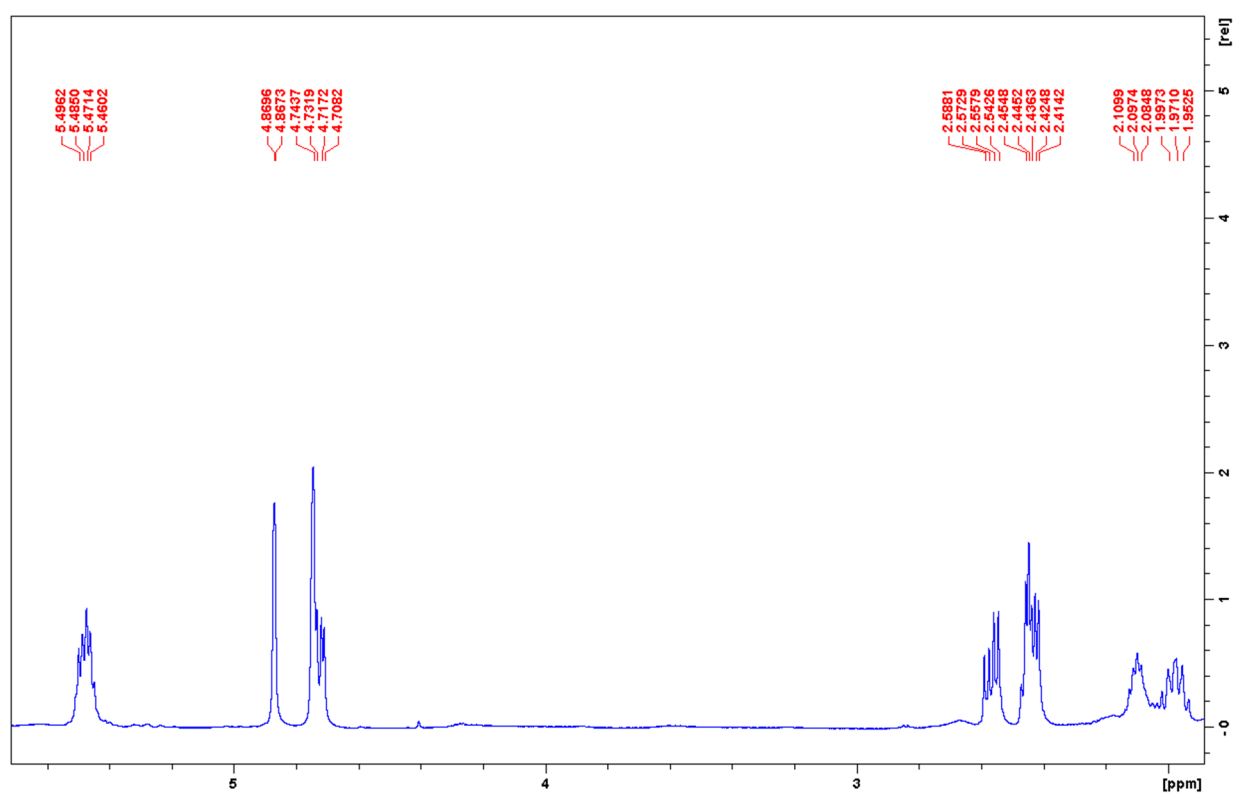Figure S47. <sup>1</sup>H NMR spectrum of 2a (Exp.).



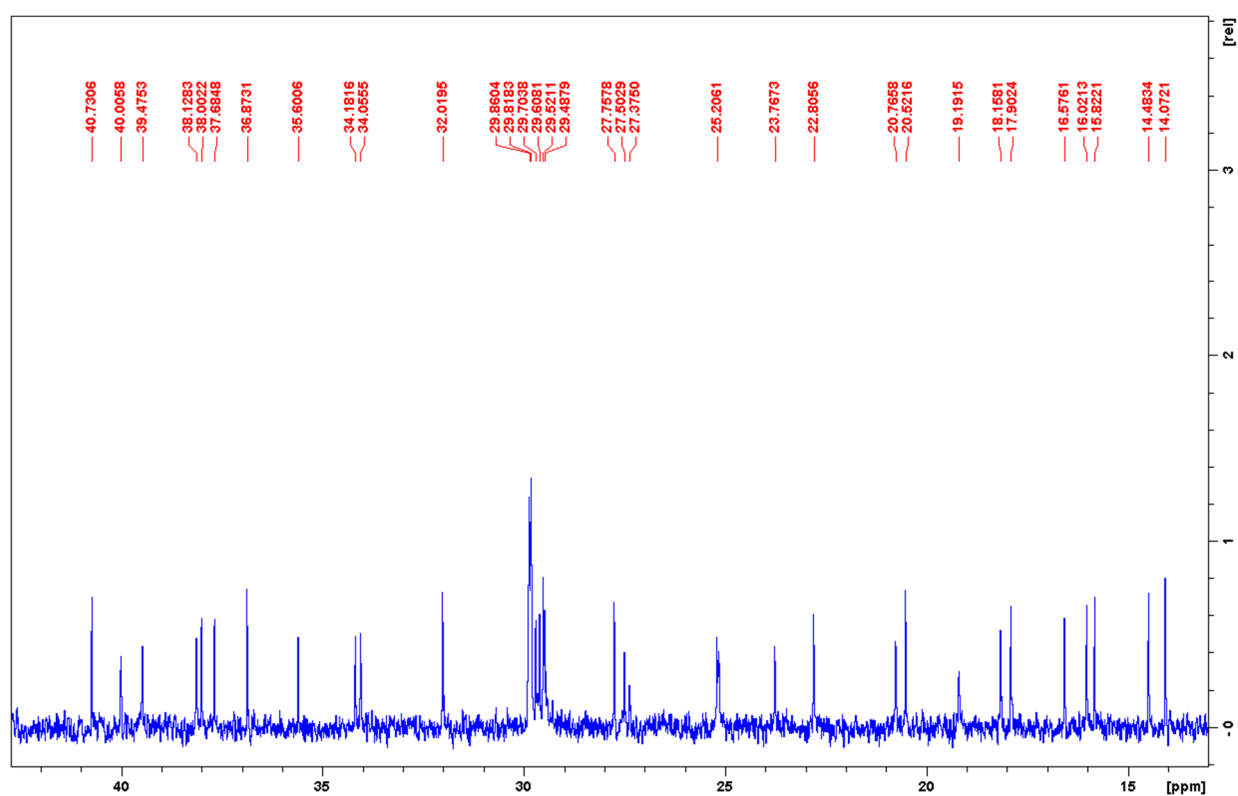Figure S48. <sup>13</sup>CNMR spectrum of 2a (Exp.).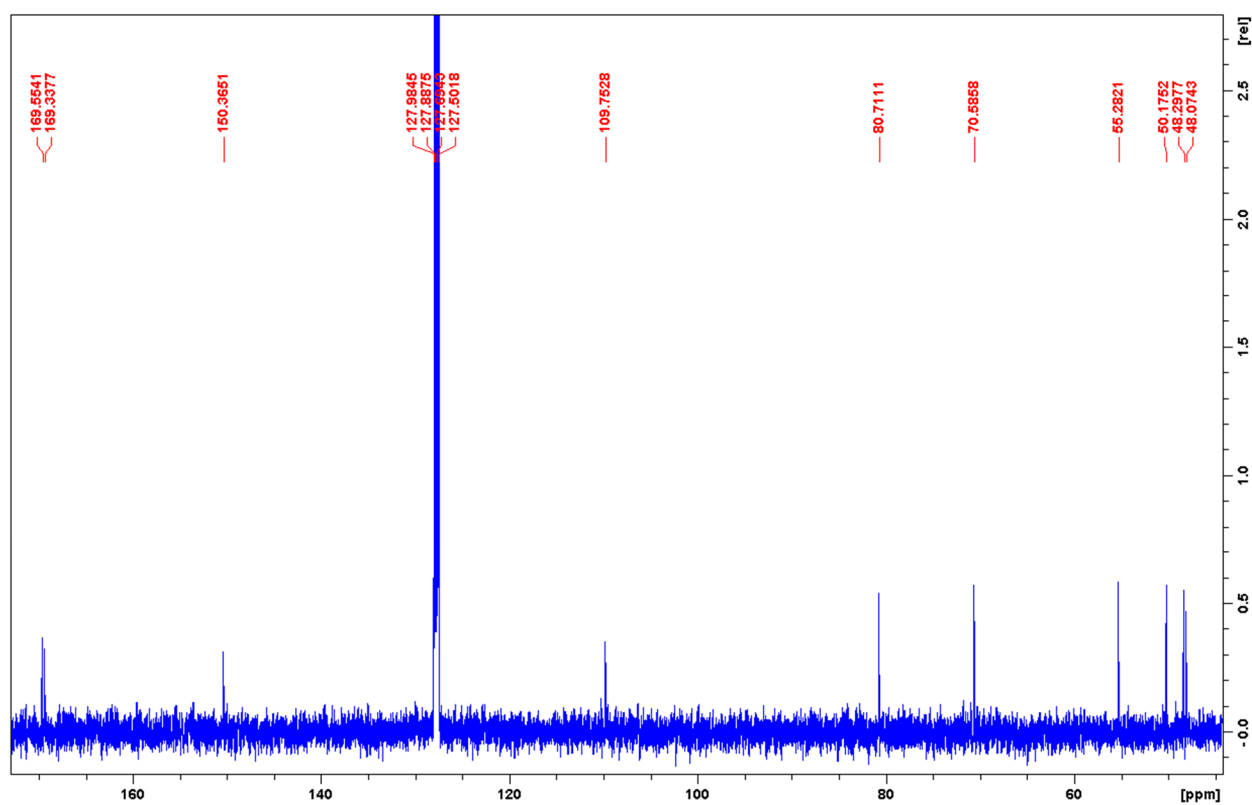Figure S49. <sup>13</sup>CNMR spectrum of 2a (Exp.).

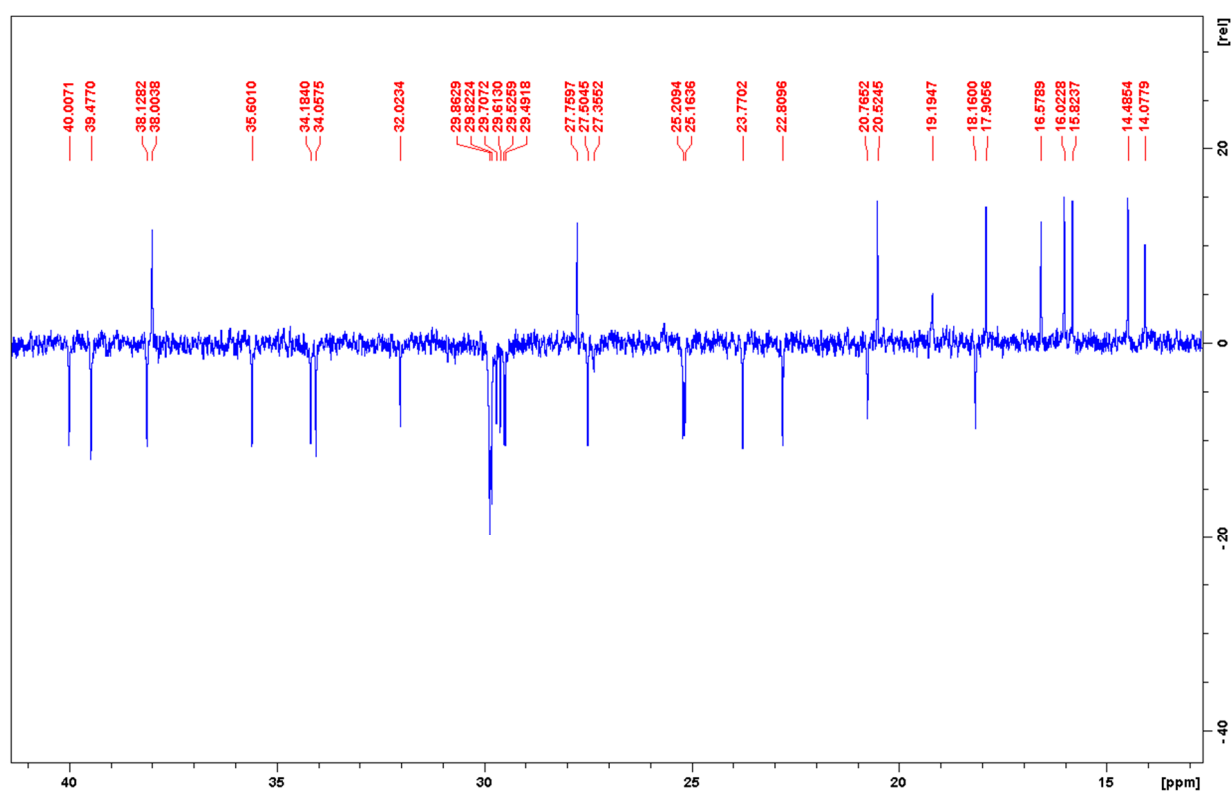

Figure S50. DEPT135 spectrum of 2a (Exp.).

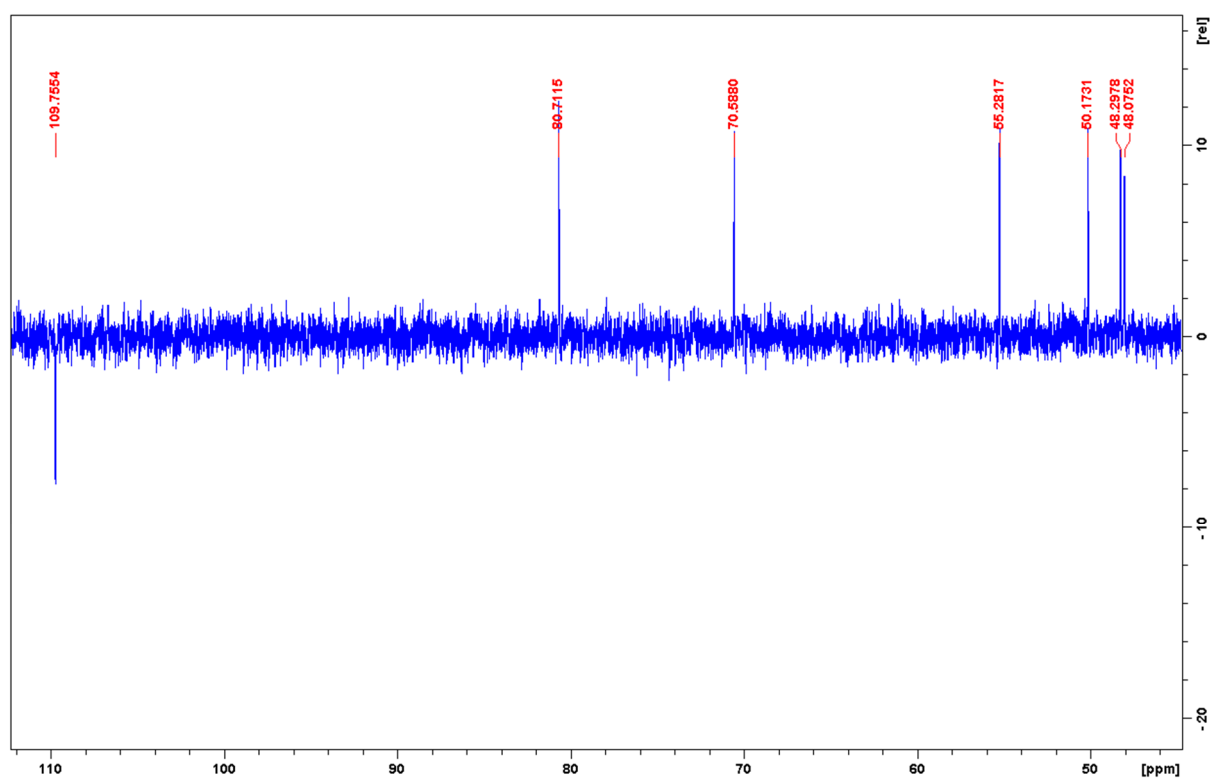

Figure S51. DEPT135 spectrum of 2a (Exp.).

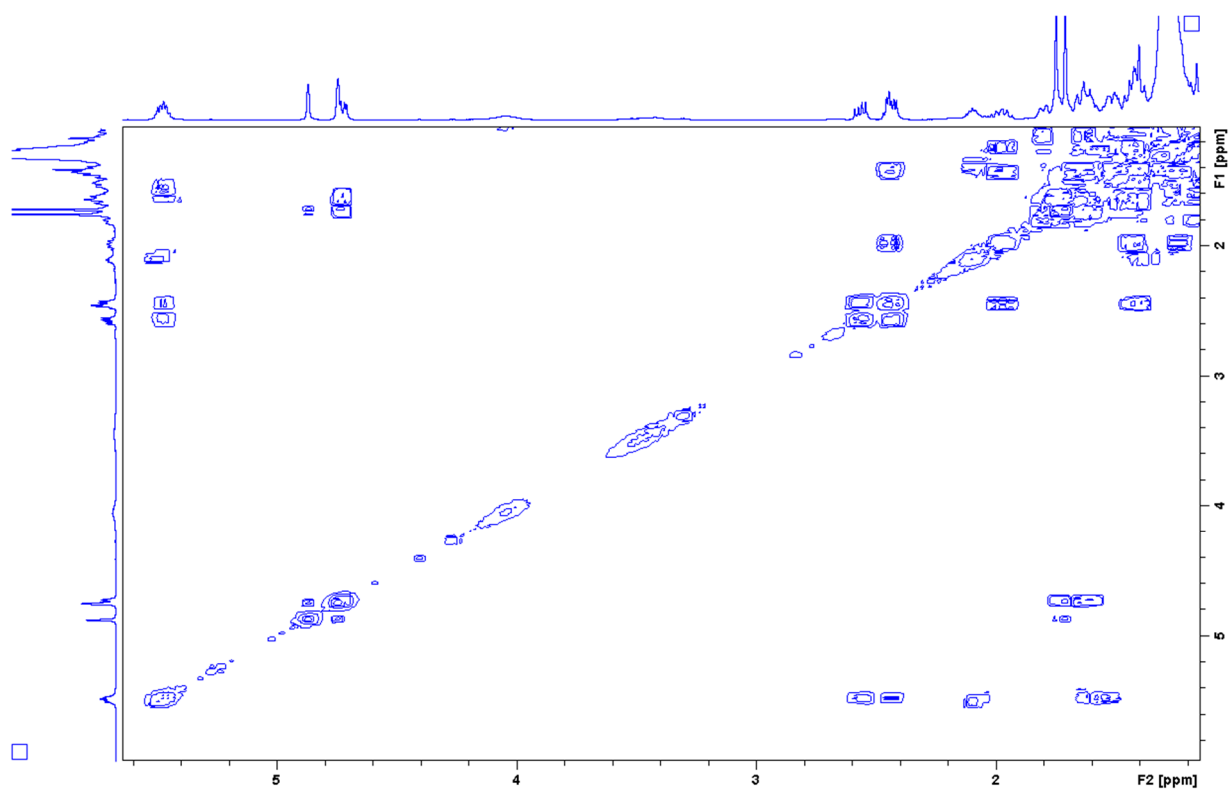

Figure S52. COSY spectrum of 2a (Exp.).

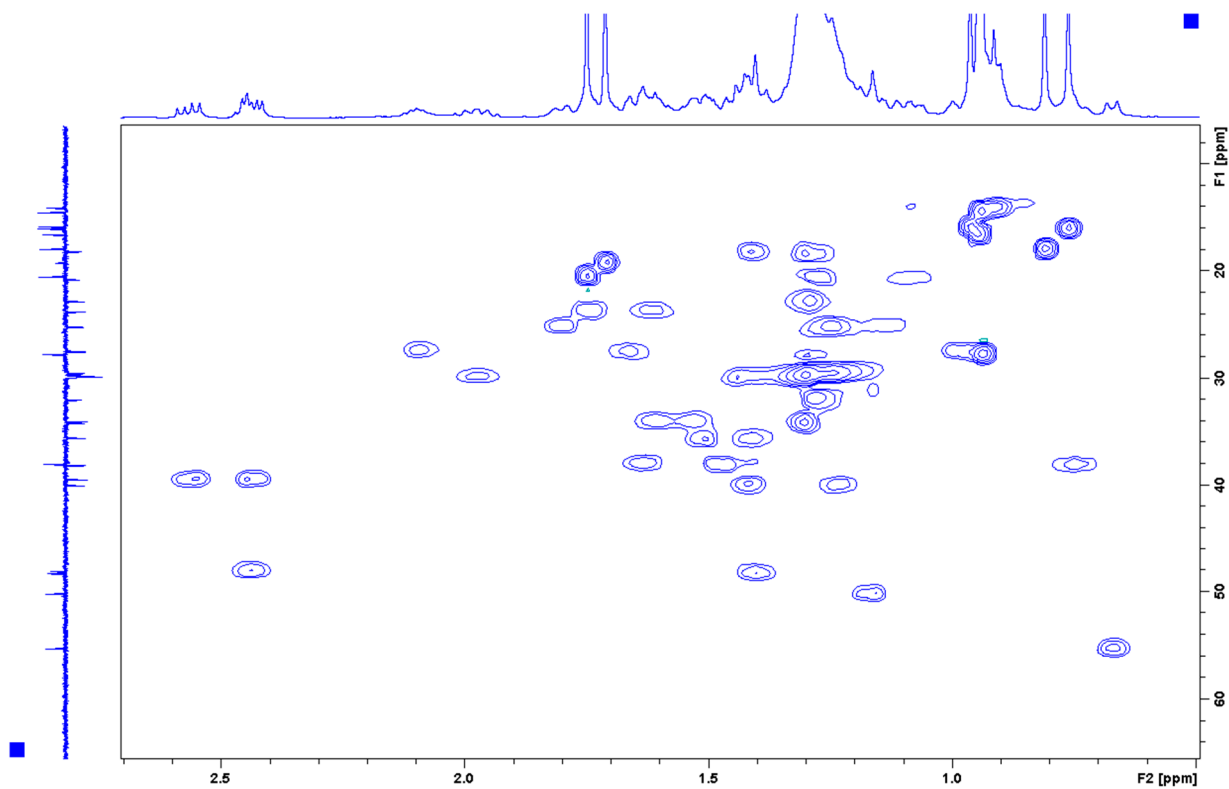

Figure S53. HSQC spectrum of 2a (Exp.).

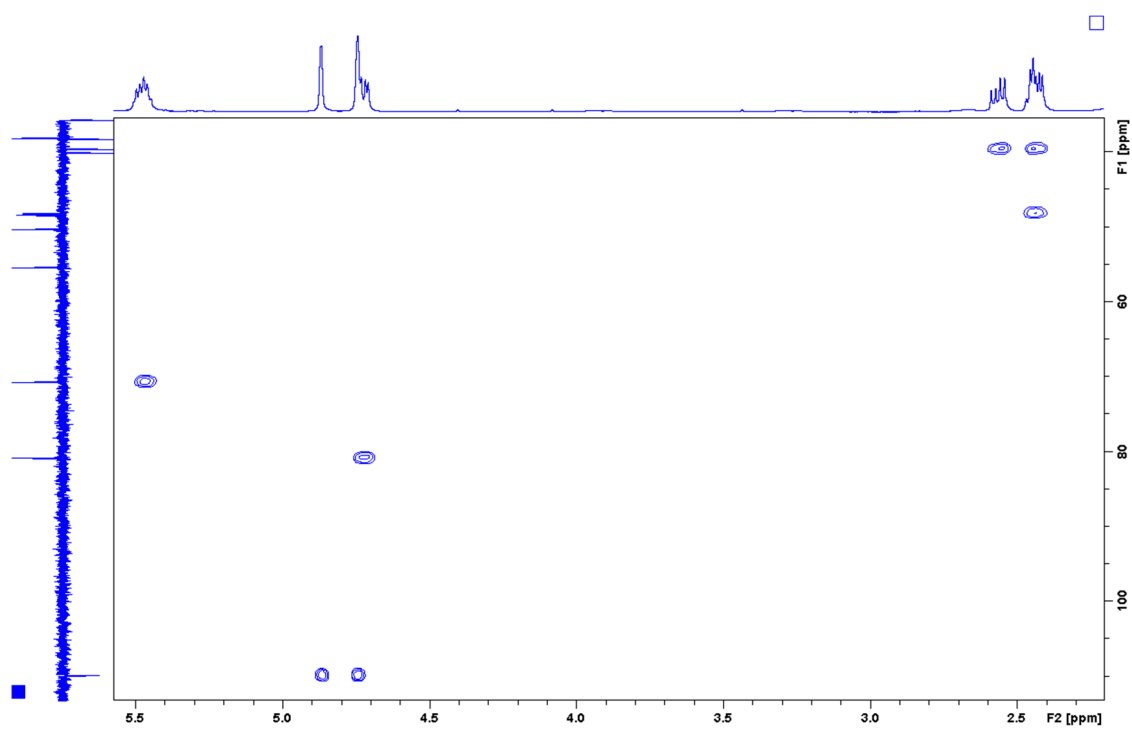

Figure S54. HSQC spectrum of **2a** (Exp.).

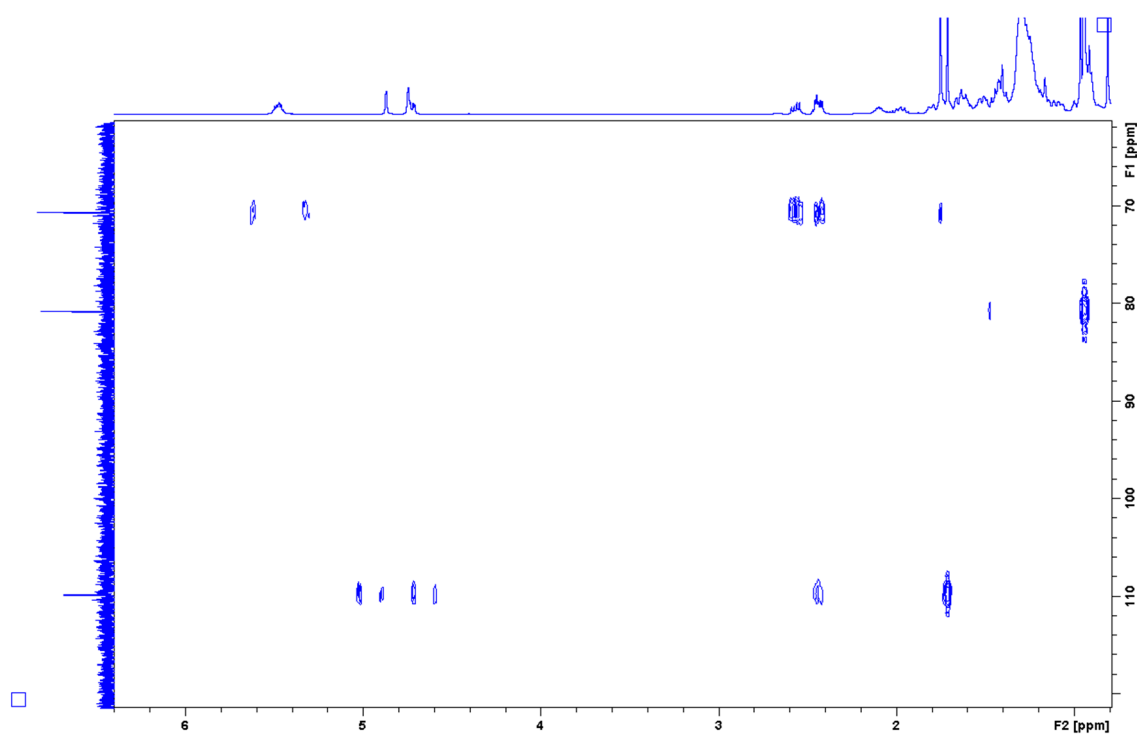

Figure S55. H2BC spectrum of **2a** (Exp.).

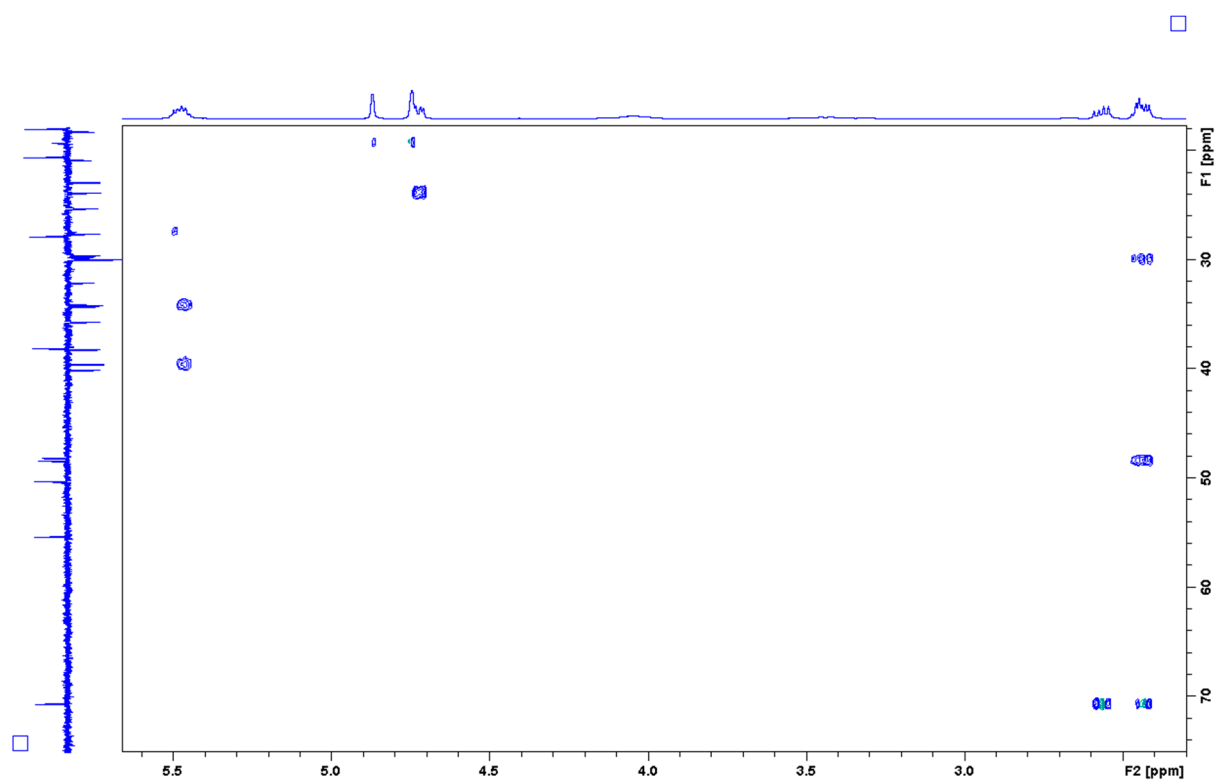

Figure S56. H2BC spectrum of 2a (Exp.).

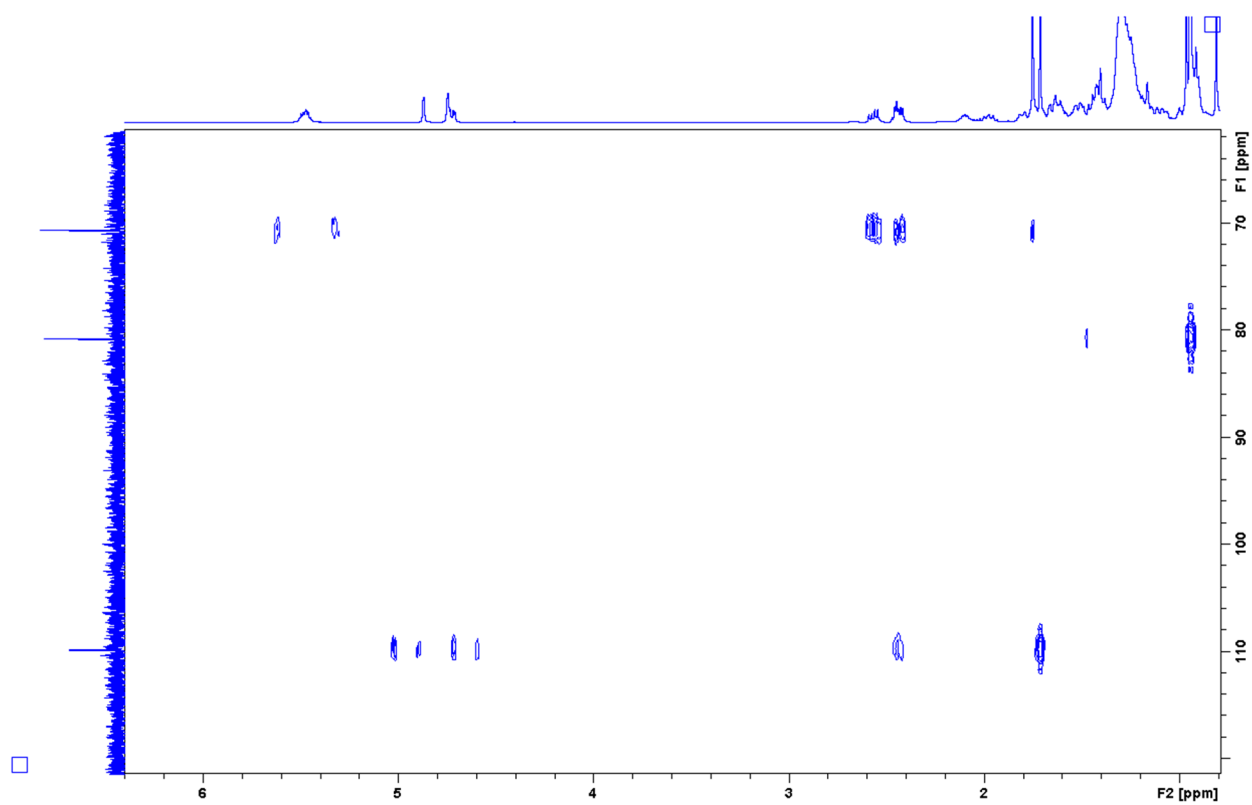

Figure S57. HMBC spectrum of 2a (Exp.).

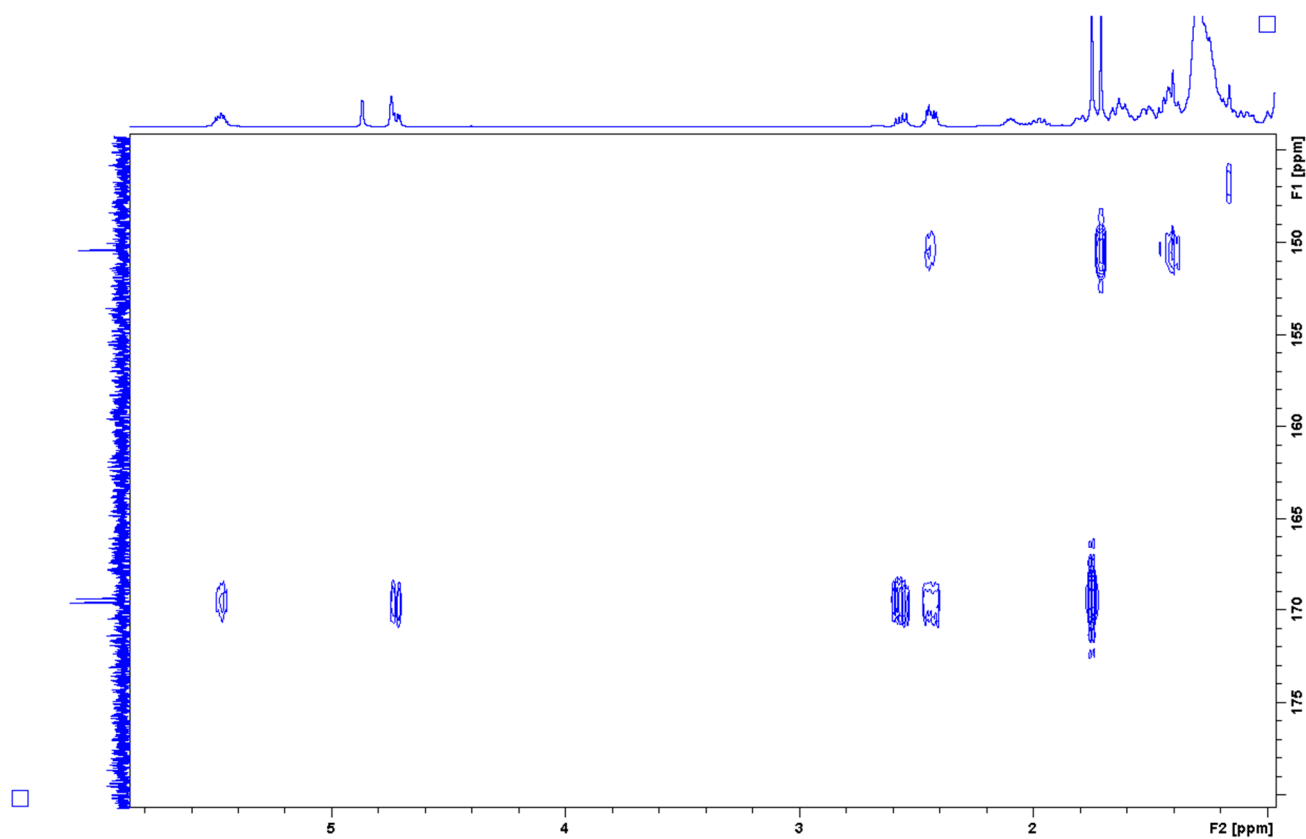

Figure S58. HMBC spectrum of 2a (Exp.).

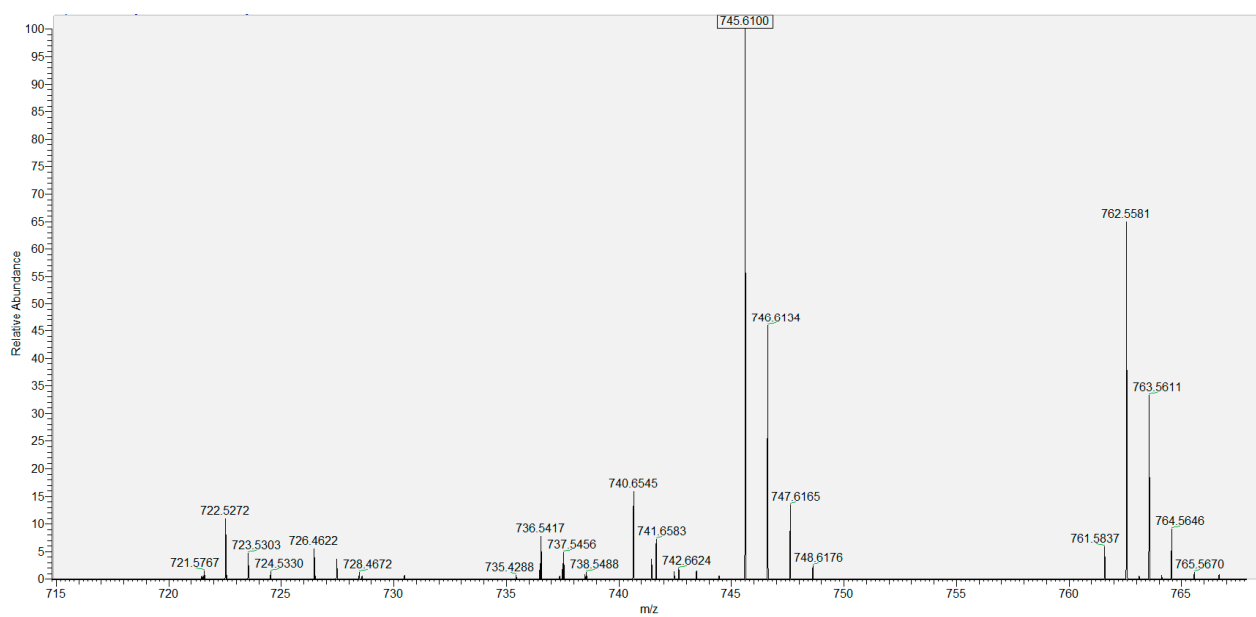

Figure S59. HRESIMS spectrum of 2a (Positive mode).

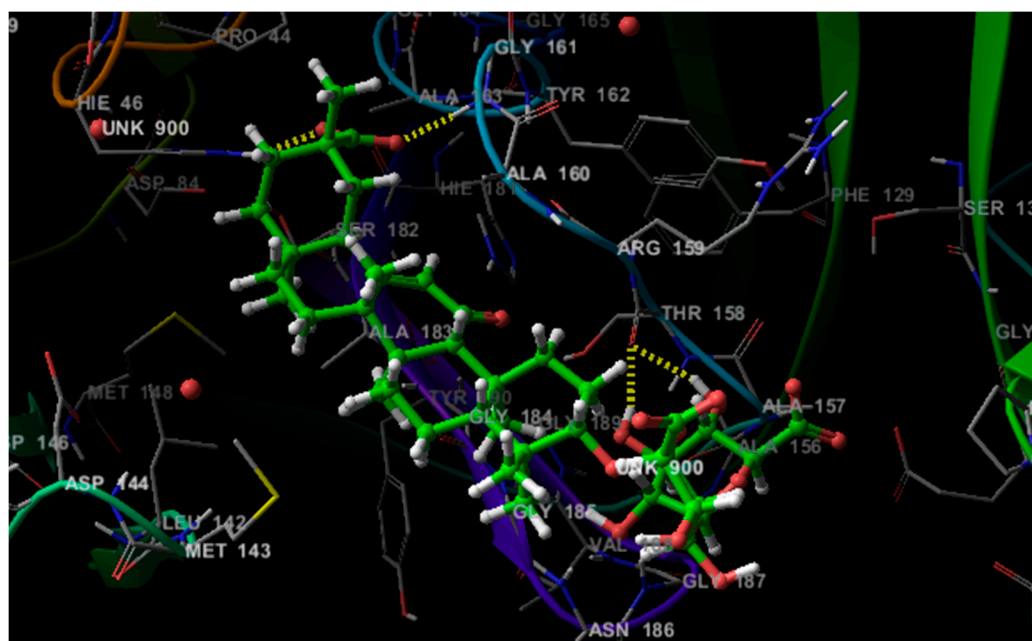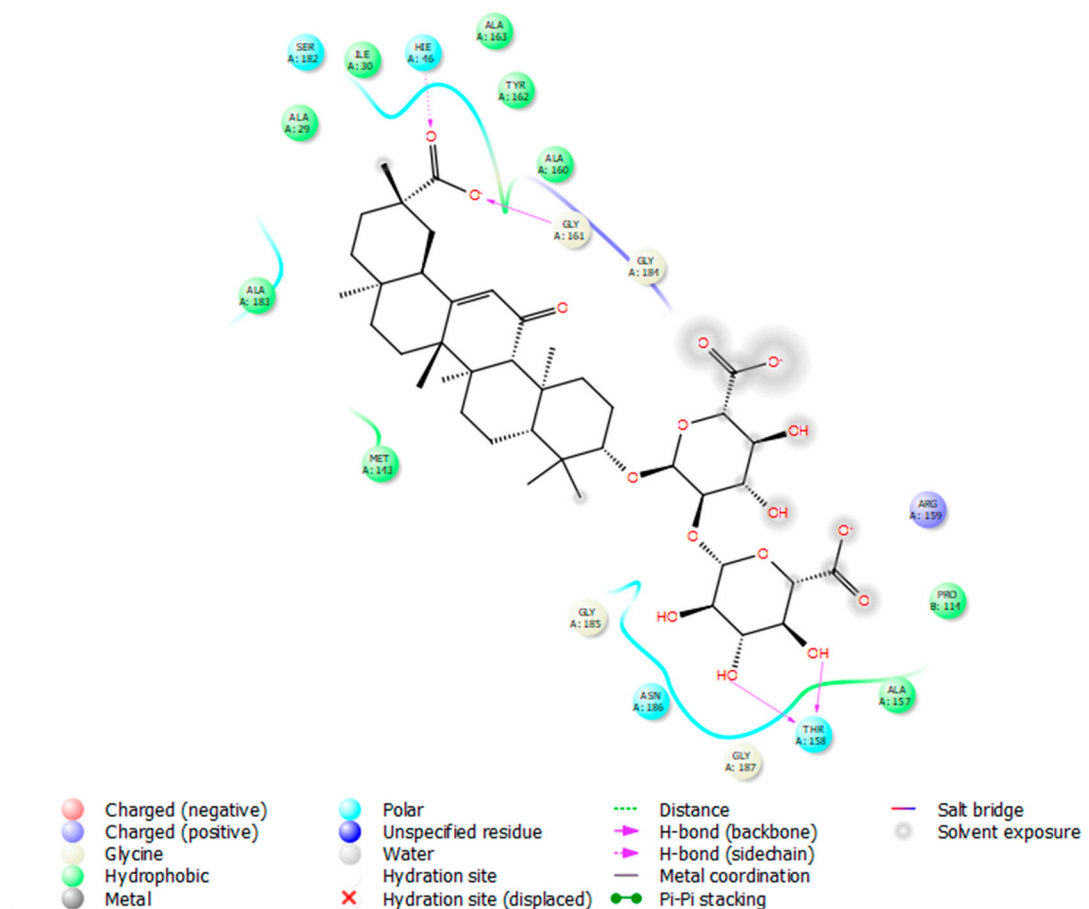

**Figure S60.** 3D and 2D interaction diagrams of FMDV 3C<sup>pro</sup> with glycyrrhizic acid in 2D representation (lower panel).

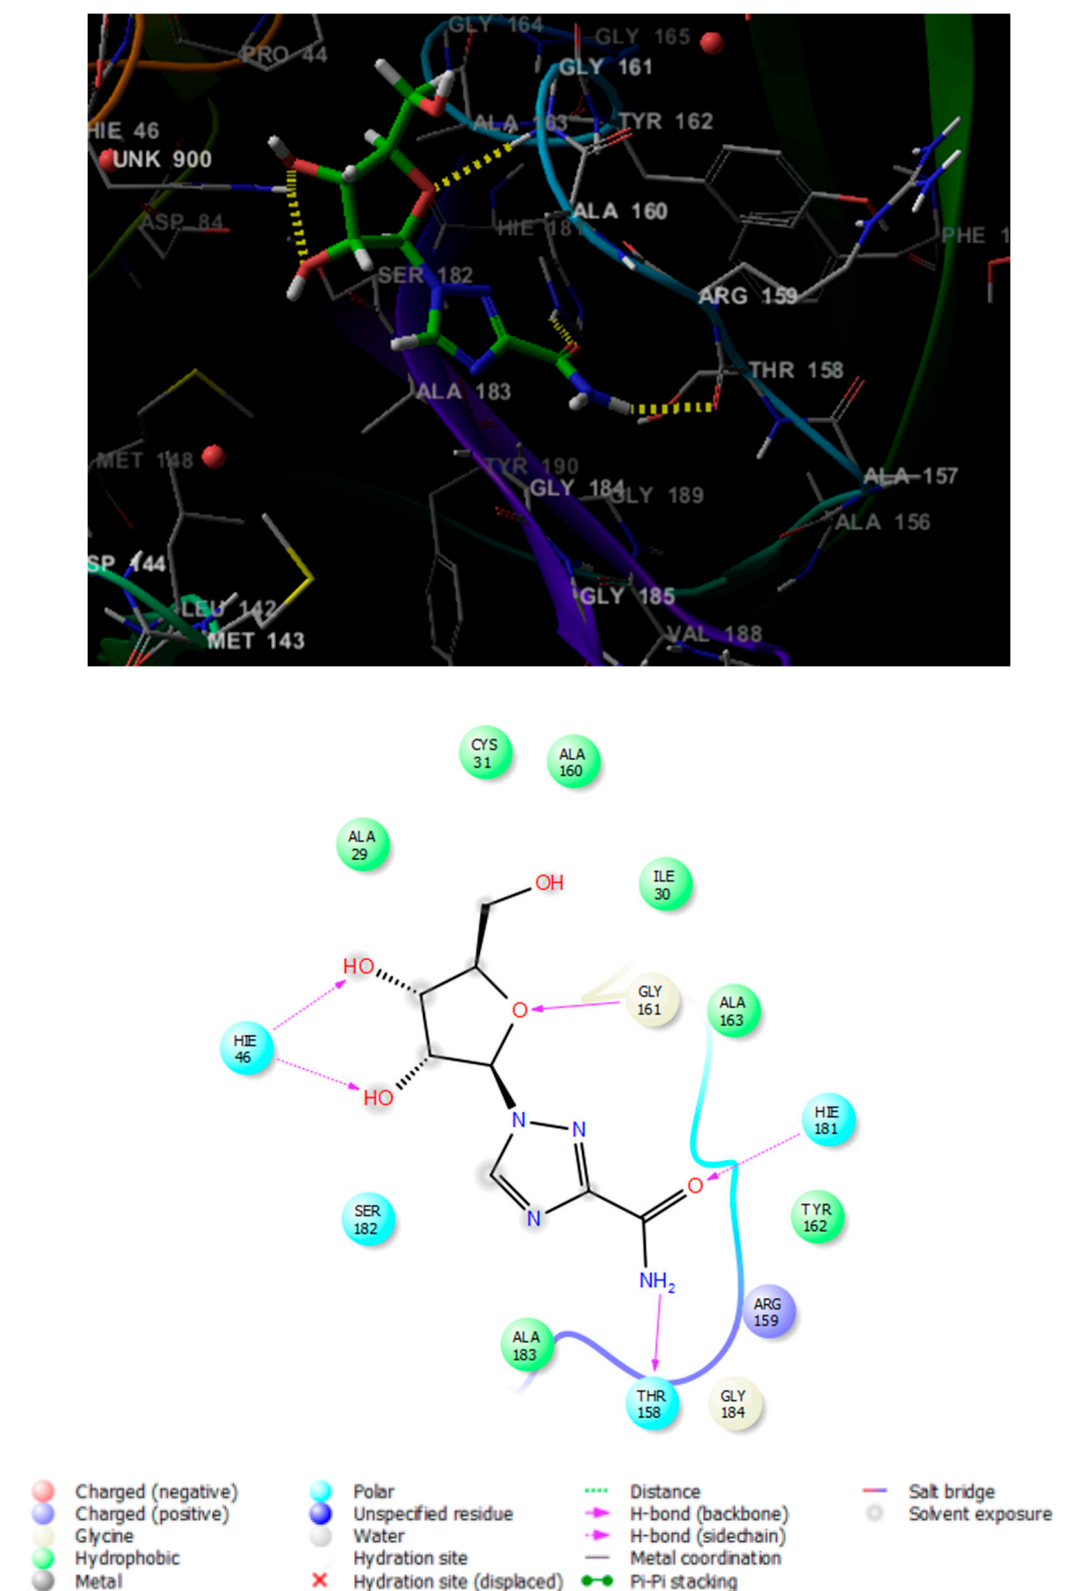

**Figure S61.** 3D and 2D interaction diagrams of FMDV 3C<sup>pro</sup> with ribavirin in 2D representation (lower panel).



**Table S1.** Determination of total extract and fractions of *R. stricta* cytotoxicity on BHK cell.

| ID  | Dilution<br>1:2 | O.D   |       |        | Mean<br>O.D | Viability % | Toxicity % | CC50    |
|-----|-----------------|-------|-------|--------|-------------|-------------|------------|---------|
| BHK | ug/ml           | 0.263 | 0.258 | 0.271  | 0.264       | 100         | 0          | ug/ml   |
| RSC | 1000            | 0.022 | 0.025 | 0.023  | 0.023333    | 8.838384    | 91.16162   | 46.137  |
|     | 500             | 0.025 | 0.023 | 0.024  | 0.024       | 9.090909    | 90.90909   |         |
|     | 250             | 0.042 | 0.048 | 0.051  | 0.047       | 17.80303    | 82.19697   |         |
|     | 125             | 0.06  | 0.072 | 0.077  | 0.069667    | 26.38889    | 73.61111   |         |
|     | 62.5            | 0.094 | 0.086 | 0.102  | 0.094       | 35.60606    | 64.39394   |         |
|     | 31.25           | 0.142 | 0.136 | 0.152  | 0.143333    | 54.29293    | 45.70707   |         |
|     | 15.625          | 0.236 | 0.242 | 0.241  | 0.239667    | 90.78283    | 9.217172   |         |
|     | 7.812           | 0.259 | 0.267 | 0.266  | 0.264       | 100         | 0          |         |
| RSE | 1000            | 0.064 | 0.058 | 0.078  | 0.066667    | 25.25253    | 74.74747   | 699.241 |
|     | 500             | 0.163 | 0.155 | 0.158  | 0.158667    | 60.10101    | 39.89899   |         |
|     | 250             | 0.268 | 0.252 | 0.269  | 0.263       | 99.62121    | 0.378788   |         |
|     | 125             | 0.264 | 0.269 | 0.261  | 0.264667    | 100.2525    | 0          |         |
|     | 62.5            | 0.257 | 0.269 | 0.253  | 0.259667    | 98.35859    | 1.641414   |         |
|     | 31.25           | 0.259 | 0.264 | 0.268  | 0.263667    | 99.87374    | 0.126263   |         |
|     | 15.625          | 0.266 | 0.268 | 0.267  | 0.267       | 101.1364    | 0          |         |
|     | 7.812           | 0.264 | 0.27  | 0.258  | 0.264       | 100         | 0          |         |
| RSH | 1000            | 0.043 | 0.058 | 0.066  | 0.055667    | 21.08586    | 78.91414   | 593.007 |
|     | 500             | 0.115 | 0.126 | 0.124  | 0.121667    | 46.08586    | 53.91414   |         |
|     | 250             | 0.195 | 0.204 | 0.213  | 0.204       | 77.27273    | 22.72727   |         |
|     | 125             | 0.234 | 0.246 | 0.241  | 0.240333    | 91.03535    | 8.964646   |         |
|     | 62.5            | 0.267 | 0.261 | 0.267  | 0.265       | 100.3788    | 0          |         |
|     | 31.25           | 0.27  | 0.262 | 0.259  | 0.263667    | 99.87374    | 0.126263   |         |
|     | 15.625          | 0.256 | 0.264 | 0.268  | 0.262667    | 99.49495    | 0.505051   |         |
|     | 7.812           | 0.261 | 0.269 | 0.269  | 0.266333    | 100.8838    | 0          |         |
| RSP | 1000            | 0.062 | 0.058 | 0.059  | 0.059667    | 22.60101    | 77.39899   | 653.318 |
|     | 500             | 0.136 | 0.141 | 0.138  | 0.138333    | 52.39899    | 47.60101   |         |
|     | 250             | 0.245 | 0.252 | 0.257  | 0.251333    | 95.20202    | 4.79798    |         |
|     | 125             | 0.268 | 0.27  | 0.261  | 0.266333    | 100.8838    | 0          |         |
|     | 62.5            | 0.261 | 0.272 | 0.264  | 0.265667    | 100.6313    | 0          |         |
|     | 31.25           | 0.264 | 0.265 | 0.264  | 0.264333    | 100.1263    | 0          |         |
|     | 15.625          | 0.268 | 0.263 | 0.2668 | 0.265933    | 100.7323    | 0          |         |
|     | 7.812           | 0.261 | 0.27  | 0.265  | 0.265333    | 100.5051    | 0          |         |
| RST | 1000            | 0.034 | 0.044 | 0.036  | 0.038       | 14.39394    | 85.60606   | 342.362 |
|     | 500             | 0.056 | 0.078 | 0.081  | 0.071667    | 27.14646    | 72.85354   |         |
|     | 250             | 0.142 | 0.138 | 0.146  | 0.142       | 53.78788    | 46.21212   |         |
|     | 125             | 0.246 | 0.252 | 0.247  | 0.248333    | 94.06566    | 5.934343   |         |

|  |        |       |       |       |          |          |   |  |
|--|--------|-------|-------|-------|----------|----------|---|--|
|  | 62.5   | 0.267 | 0.262 | 0.269 | 0.266    | 100.7576 | 0 |  |
|  | 31.25  | 0.27  | 0.264 | 0.264 | 0.266    | 100.7576 | 0 |  |
|  | 15.625 | 0.263 | 0.268 | 0.265 | 0.265333 | 100.5051 | 0 |  |
|  | 7.812  | 0.266 | 0.26  | 0.268 | 0.264667 | 100.2525 | 0 |  |

**Table S2.** Determination of compounds 1-9 cytotoxicity on BHK cell.

| ID       | ug/ml | O.D   |       |       | Mean O.D | Viability % | Toxicity % | SEM±     | CC <sub>50</sub> | MNTC |
|----------|-------|-------|-------|-------|----------|-------------|------------|----------|------------------|------|
| BHK      | ---   | 0.351 | 0.349 | 0.32  | 0.34     | 100         | 0          | 0.010017 | ug               |      |
| <b>1</b> | 1000  | 0.184 | 0.162 | 0.147 | 0.164333 | 48.33333    | 51.66667   | 0.010745 | 984.18           | 500  |
|          | 500   | 0.336 | 0.345 | 0.341 | 0.340667 | 100.1961    | 0          | 0.002603 |                  |      |
|          | 250   | 0.338 | 0.343 | 0.328 | 0.336333 | 98.92157    | 1.078431   | 0.00441  |                  |      |
|          | 125   | 0.346 | 0.34  | 0.34  | 0.342    | 100.5882    | 0          | 0.002    |                  |      |
|          | 62.5  | 0.335 | 0.353 | 0.331 | 0.339667 | 99.90196    | 0.098039   | 0.006766 |                  |      |
|          | 31.25 | 0.348 | 0.339 | 0.343 | 0.343333 | 100.9804    | 0          | 0.002603 |                  |      |
| <b>2</b> | 1000  | 0.076 | 0.089 | 0.092 | 0.085667 | 25.19608    | 74.80392   | 0.00491  | 497.42           | 125  |
|          | 500   | 0.142 | 0.159 | 0.172 | 0.157667 | 46.37255    | 53.62745   | 0.008686 |                  |      |
|          | 250   | 0.295 | 0.301 | 0.312 | 0.302667 | 89.01961    | 10.98039   | 0.004978 |                  |      |
|          | 125   | 0.341 | 0.326 | 0.34  | 0.335667 | 98.72549    | 1.27451    | 0.004842 |                  |      |
|          | 62.5  | 0.348 | 0.347 | 0.33  | 0.341667 | 100.4902    | 0          | 0.00584  |                  |      |
|          | 31.25 | 0.339 | 0.352 | 0.337 | 0.342667 | 100.7843    | 0          | 0.004702 |                  |      |
| <b>3</b> | 1000  | 0.074 | 0.069 | 0.052 | 0.065    | 19.11765    | 80.88235   | 0.006658 | 462.17           | 125  |
|          | 500   | 0.142 | 0.139 | 0.157 | 0.146    | 42.94118    | 57.05882   | 0.005568 |                  |      |
|          | 250   | 0.286 | 0.302 | 0.294 | 0.294    | 86.47059    | 13.52941   | 0.004619 |                  |      |
|          | 125   | 0.328 | 0.351 | 0.343 | 0.340667 | 100.1961    | 0          | 0.006741 |                  |      |
|          | 62.5  | 0.346 | 0.337 | 0.345 | 0.342667 | 100.7843    | 0          | 0.002848 |                  |      |
|          | 31.25 | 0.335 | 0.34  | 0.348 | 0.341    | 100.2941    | 0          | 0.003786 |                  |      |
| <b>4</b> | 1000  | 0.214 | 0.196 | 0.225 | 0.211667 | 62.2549     | 37.7451    | 0.008452 | 1160.71          | 500  |
|          | 500   | 0.342 | 0.338 | 0.343 | 0.341    | 100.2941    | 0          | 0.001528 |                  |      |
|          | 250   | 0.346 | 0.332 | 0.345 | 0.341    | 100.2941    | 0          | 0.004509 |                  |      |
|          | 125   | 0.332 | 0.339 | 0.356 | 0.342333 | 100.6863    | 0          | 0.007126 |                  |      |
|          | 62.5  | 0.352 | 0.33  | 0.328 | 0.336667 | 99.01961    | 0.980392   | 0.007688 |                  |      |

|   |       |       |       |       |          |          |          |          |        |     |
|---|-------|-------|-------|-------|----------|----------|----------|----------|--------|-----|
|   | 31.25 | 0.347 | 0.347 | 0.34  | 0.344667 | 101.3725 | 0        | 0.002333 |        |     |
| 5 | 1000  | 0.084 | 0.096 | 0.101 | 0.093667 | 27.54902 | 72.45098 | 0.005044 | 708.18 | 250 |
|   | 500   | 0.186 | 0.214 | 0.207 | 0.202333 | 59.5098  | 40.4902  | 0.008413 |        |     |
|   | 250   | 0.323 | 0.316 | 0.334 | 0.324333 | 95.39216 | 4.607843 | 0.005239 |        |     |
|   | 125   | 0.336 | 0.341 | 0.349 | 0.342    | 100.5882 | 0        | 0.003786 |        |     |
|   | 62.5  | 0.343 | 0.338 | 0.339 | 0.34     | 100      | 0        | 0.001528 |        |     |
|   | 31.25 | 0.343 | 0.338 | 0.342 | 0.341    | 100.2941 | 0        | 0.001528 |        |     |
| 6 | 1000  | 0.108 | 0.117 | 0.132 | 0.119    | 35       | 65       | 0.007    | 818.09 | 250 |
|   | 500   | 0.257 | 0.263 | 0.248 | 0.256    | 75.29412 | 24.70588 | 0.004359 |        |     |
|   | 250   | 0.346 | 0.346 | 0.341 | 0.344333 | 101.2745 | 0        | 0.001667 |        |     |
|   | 125   | 0.335 | 0.348 | 0.346 | 0.343    | 100.8824 | 0        | 0.004041 |        |     |
|   | 62.5  | 0.348 | 0.342 | 0.345 | 0.345    | 101.4706 | 0        | 0.001732 |        |     |
|   | 31.25 | 0.35  | 0.349 | 0.321 | 0.34     | 100      | 0        | 0.009504 |        |     |
| 7 | 1000  | 0.095 | 0.088 | 0.105 | 0.096    | 28.23529 | 71.76471 | 0.004933 | 762.93 | 250 |
|   | 500   | 0.248 | 0.263 | 0.258 | 0.256333 | 75.39216 | 24.60784 | 0.00441  |        |     |
|   | 250   | 0.324 | 0.319 | 0.338 | 0.327    | 96.17647 | 3.823529 | 0.005686 |        |     |
|   | 125   | 0.35  | 0.332 | 0.327 | 0.336333 | 98.92157 | 1.078431 | 0.006984 |        |     |
|   | 62.5  | 0.326 | 0.33  | 0.343 | 0.333    | 97.94118 | 2.058824 | 0.005132 |        |     |
|   | 31.25 | 0.344 | 0.329 | 0.34  | 0.337667 | 99.31373 | 0.686275 | 0.004485 |        |     |
| 8 | 1000  | 0.092 | 0.114 | 0.089 | 0.098333 | 28.92157 | 71.07843 | 0.007881 | 174.23 | 125 |
|   | 500   | 0.168 | 0.18  | 0.178 | 0.175333 | 51.56863 | 48.43137 | 0.003712 |        |     |
|   | 250   | 0.294 | 0.32  | 0.316 | 0.31     | 91.17647 | 8.823529 | 0.008083 |        |     |
|   | 125   | 0.326 | 0.347 | 0.349 | 0.340667 | 100.1961 | 0        | 0.007356 |        |     |
|   | 62.5  | 0.352 | 0.33  | 0.328 | 0.336667 | 99.01961 | 0.980392 | 0.007688 |        |     |
|   | 31.25 | 0.342 | 0.349 | 0.331 | 0.340667 | 100.1961 | 0        | 0.005239 |        |     |
| 9 | 1000  | 0.096 | 0.114 | 0.136 | 0.115333 | 33.92157 | 66.07843 | 0.011566 | 747.39 | 125 |
|   | 500   | 0.194 | 0.205 | 0.214 | 0.204333 | 60.09804 | 39.90196 | 0.005783 |        |     |
|   | 250   | 0.31  | 0.305 | 0.324 | 0.313    | 92.05882 | 7.941176 | 0.005686 |        |     |
|   | 125   | 0.328 | 0.339 | 0.349 | 0.338667 | 99.60784 | 0.392157 | 0.006064 |        |     |
|   | 62.5  | 0.347 | 0.34  | 0.346 | 0.344333 | 101.2745 | 0        | 0.002186 |        |     |
|   | 31.25 | 0.329 | 0.351 | 0.342 | 0.340667 | 100.1961 | 0        | 0.006386 |        |     |
